# Supplementary material
Source: publisher figshare collection journal article supplement (https://acs.figshare.com/ndownloader/files/3891034)
Supplement: Supplementary file 1 [file 3891034]

_publ_section_references
;
Altomare, A., Burla, M. C., Camalli, M., Cascarano, G. L., Giacovazzo, C.,
Guagliardi, A., Moliterni, A. G. G., Polidori, G., Spagna, R (1999).
SIR97, J. Appl. Cryst. 32, 115-119.

Bruker (2009). SAINT V7.68A, Bruker AXS, Inc., Madison, WI, USA.

Bruker (2012). APEX2 v2012.4-3, Bruker AXS, Inc., Madison, WI, USA.

Sheldrick, G. M. (2008). SADABS V2008/1, University of G\"ottingen, Germany.

Sheldrick, G. M. (2008). Acta Cryst. A64, 112-122.

Spek, A. L. (2003). PLATON V300106, J. Appl. Cryst. 36, 7-13.
;
 
data_1 
  
_vrf_PLAT601_1 
; 
PROBLEM: _A Structure Contains Solvent Accessible VOIDS of 357 A**3. 
RESPONSE:  Reflection contributions from two disordered solvent molecules 
(hexane and tetrahydrofurane with partial occupancy in the solvent pocket) 
were removed using program PLATON, function SQUEEZE (Spek, 2003), which 
determined there to be one pocket of 87 electrons in 353 \%A^3^ per unit 
cell removed. Since definitive amount of solvent could not be determined, 
it was not included in the molecular formula. 
; 
  
_audit_creation_method            SHELXL-97 
_chemical_name_systematic 
; 
 1 
; 
_chemical_name_common             TpPh2Fe(2,6-dichlorophenolate) 
_chemical_melting_point           ? 
_chemical_formula_moiety          'C51 H37 B Cl2 Fe N6 O' 
_chemical_formula_sum 
 'C51 H37 B Cl2 Fe N6 O' 
_chemical_formula_weight          887.43 
  
loop_ 
 _atom_type_symbol 
 _atom_type_description 
 _atom_type_scat_dispersion_real 
 _atom_type_scat_dispersion_imag 
 _atom_type_scat_source 
 'C'  'C'   0.0033   0.0016 
 'International Tables Vol C Tables 4.2.6.8 and 6.1.1.4' 
 'H'  'H'   0.0000   0.0000 
 'International Tables Vol C Tables 4.2.6.8 and 6.1.1.4' 
 'B'  'B'   0.0013   0.0007 
 'International Tables Vol C Tables 4.2.6.8 and 6.1.1.4' 
 'N'  'N'   0.0061   0.0033 
 'International Tables Vol C Tables 4.2.6.8 and 6.1.1.4' 
 'O'  'O'   0.0106   0.0060 
 'International Tables Vol C Tables 4.2.6.8 and 6.1.1.4' 
 'Cl'  'Cl'   0.1484   0.1585 
 'International Tables Vol C Tables 4.2.6.8 and 6.1.1.4' 
 'Fe'  'Fe'   0.3463   0.8444 
 'International Tables Vol C Tables 4.2.6.8 and 6.1.1.4' 
  
_symmetry_cell_setting            Triclinic 
_symmetry_space_group_name_H-M    'P -1' 
  
loop_ 
 _symmetry_equiv_pos_as_xyz 
 'x, y, z' 
 '-x, -y, -z' 
  
_cell_length_a                    12.305(2) 
_cell_length_b                    14.638(3) 
_cell_length_c                    15.082(3) 
_cell_angle_alpha                 64.193(3) 
_cell_angle_beta                  84.138(4) 
_cell_angle_gamma                 71.675(4) 
_cell_volume                      2319.8(7) 
_cell_formula_units_Z             2 
_cell_measurement_temperature     100.0(5) 
_cell_measurement_reflns_used     3790 
_cell_measurement_theta_min       2.26 
_cell_measurement_theta_max       30.31 
  
_exptl_crystal_description        block 
_exptl_crystal_colour             colorless 
_exptl_crystal_size_max           0.24 
_exptl_crystal_size_mid           0.20 
_exptl_crystal_size_min           0.08 
_exptl_crystal_density_meas       ? 
_exptl_crystal_density_diffrn     1.270 
_exptl_crystal_density_method     'not measured' 
_exptl_crystal_F_000              916 
_exptl_absorpt_coefficient_mu     0.484 
_exptl_absorpt_correction_type    multi-scan 
_exptl_absorpt_correction_T_min   0.8927 
_exptl_absorpt_correction_T_max   0.9623 
_exptl_absorpt_process_details    'SADABS (Sheldrick, 2008)' 
  
_exptl_special_details 
; 
 ? 
; 
  
_diffrn_ambient_temperature       100.0(5) 
_diffrn_radiation_wavelength      0.71073 
_diffrn_radiation_type            MoK\a 
_diffrn_radiation_source          'fine-focus sealed tube' 
_diffrn_radiation_monochromator   graphite 
_diffrn_measurement_device_type   'Bruker SMART APEX II CCD Platform' 
_diffrn_measurement_method        'area detector, \w scans per \f' 
_diffrn_detector_area_resol_mean  ? 
_diffrn_standards_number          0 
_diffrn_standards_interval_count  ? 
_diffrn_standards_interval_time   ? 
_diffrn_standards_decay_%         ? 
_diffrn_reflns_number             47302 
_diffrn_reflns_av_R_equivalents   0.0780 
_diffrn_reflns_av_sigmaI/netI     0.1187 
_diffrn_reflns_limit_h_min        -19 
_diffrn_reflns_limit_h_max        19 
_diffrn_reflns_limit_k_min        -22 
_diffrn_reflns_limit_k_max        22 
_diffrn_reflns_limit_l_min        -23 
_diffrn_reflns_limit_l_max        23 
_diffrn_reflns_theta_min          1.62 
_diffrn_reflns_theta_max          33.73 
_reflns_number_total              18368 
_reflns_number_gt                 9918 
_reflns_threshold_expression      >2sigma(I) 
  
_computing_data_collection        'APEX2 (Bruker, 2012)' 
_computing_cell_refinement        'SAINT (Bruker, 2009)' 
_computing_data_reduction         'SAINT (Bruker, 2009)' 
_computing_structure_solution     'SIR97 (Altomare et al., 1999)' 
_computing_structure_refinement   'SHELXL-97 (Sheldrick, 2008)' 
_computing_molecular_graphics     'SHELXTL (Sheldrick, 2008)' 
_computing_publication_material   'SHELXTL (Sheldrick, 2008)' 
  
_refine_special_details 
; 
 Refinement of F^2^ against ALL reflections.  The weighted R-factor wR and 
 goodness of fit S are based on F^2^, conventional R-factors R are based 
 on F, with F set to zero for negative F^2^. The threshold expression of 
 F^2^ > 2sigma(F^2^) is used only for calculating R-factors(gt) etc. and is 
 not relevant to the choice of reflections for refinement.  R-factors based 
 on F^2^ are statistically about twice as large as those based on F, and R- 
 factors based on ALL data will be even larger. 
  
 Reflection contributions from two disordered solvent molecules 
 (hexane and tetrahydrofurane with partial occupancy in the solvent pocket) 
 were removed using program PLATON, function SQUEEZE (Spek, 2003), which 
 determined there to be one pocket of 87 electrons in 353 \%A^3^ per unit 
 cell removed. Since definitive amount of solvent could not be determined, 
 it was not included in the molecular formula. 
; 
  
_refine_ls_structure_factor_coef  Fsqd 
_refine_ls_matrix_type            full 
_refine_ls_weighting_scheme       calc 
_refine_ls_weighting_details 
 'calc w=1/[\s^2^(Fo^2^)+(0.0577P)^2^+0.0000P] where P=(Fo^2^+2Fc^2^)/3' 
_atom_sites_solution_primary      direct 
_atom_sites_solution_secondary    difmap 
_atom_sites_solution_hydrogens    geom 
_refine_ls_hydrogen_treatment     constr 
_refine_ls_extinction_method      none 
_refine_ls_extinction_coef        ? 
_refine_ls_number_reflns          18368 
_refine_ls_number_parameters      559 
_refine_ls_number_restraints      0 
_refine_ls_R_factor_all           0.1107 
_refine_ls_R_factor_gt            0.0563 
_refine_ls_wR_factor_ref          0.1356 
_refine_ls_wR_factor_gt           0.1170 
_refine_ls_goodness_of_fit_ref    0.873 
_refine_ls_restrained_S_all       0.873 
_refine_ls_shift/su_max           0.001 
_refine_ls_shift/su_mean          0.000 
  
loop_ 
 _atom_site_label 
 _atom_site_type_symbol 
 _atom_site_fract_x 
 _atom_site_fract_y 
 _atom_site_fract_z 
 _atom_site_U_iso_or_equiv 
 _atom_site_adp_type 
 _atom_site_occupancy 
 _atom_site_symmetry_multiplicity 
 _atom_site_calc_flag 
 _atom_site_refinement_flags 
 _atom_site_disorder_assembly 
 _atom_site_disorder_group 
Fe1 Fe 0.68912(2) 0.83347(2) 0.83367(2) 0.01542(7) Uani 1 1 d . . . 
Cl1 Cl 0.65668(5) 1.05452(4) 0.77574(4) 0.02802(12) Uani 1 1 d . . . 
Cl2 Cl 0.80595(5) 0.89846(5) 0.50761(4) 0.03011(12) Uani 1 1 d . . . 
O1 O 0.71573(12) 0.89455(11) 0.69678(10) 0.0199(3) Uani 1 1 d . . . 
N1 N 0.82924(14) 0.76327(12) 0.93620(11) 0.0161(3) Uani 1 1 d . . . 
N2 N 0.82208(13) 0.67237(12) 1.01613(11) 0.0153(3) Uani 1 1 d . . . 
N3 N 0.68712(14) 0.68296(12) 0.84816(11) 0.0162(3) Uani 1 1 d . . . 
N4 N 0.70596(13) 0.60482(12) 0.94284(11) 0.0153(3) Uani 1 1 d . . . 
N5 N 0.57011(14) 0.81806(12) 0.94519(11) 0.0166(3) Uani 1 1 d . . . 
N6 N 0.60614(14) 0.72218(12) 1.02723(11) 0.0161(3) Uani 1 1 d . . . 
B1 B 0.71652(18) 0.63329(17) 1.02853(15) 0.0149(4) Uani 1 1 d . . . 
H1 H 0.7247 0.5689 1.0926 0.018 Uiso 1 1 calc R . . 
C1 C 0.93064(16) 0.77536(15) 0.94752(14) 0.0173(4) Uani 1 1 d . . . 
C2 C 0.98782(17) 0.69258(15) 1.03427(14) 0.0190(4) Uani 1 1 d . . . 
H2 H 1.0607 0.6820 1.0594 0.023 Uiso 1 1 calc R . . 
C3 C 0.91660(16) 0.62883(15) 1.07647(14) 0.0165(4) Uani 1 1 d . . . 
C4 C 0.66992(16) 0.63846(15) 0.79153(14) 0.0178(4) Uani 1 1 d . . . 
C5 C 0.67914(17) 0.53157(15) 0.84935(14) 0.0193(4) Uani 1 1 d . . . 
H5 H 0.6721 0.4818 0.8274 0.023 Uiso 1 1 calc R . . 
C6 C 0.70063(16) 0.51240(15) 0.94509(14) 0.0169(4) Uani 1 1 d . . . 
C7 C 0.47126(16) 0.87515(15) 0.96793(14) 0.0164(4) Uani 1 1 d . . . 
C8 C 0.44567(17) 0.81727(16) 1.06471(14) 0.0198(4) Uani 1 1 d . . . 
H8 H 0.3817 0.8394 1.0995 0.024 Uiso 1 1 calc R . . 
C9 C 0.53203(16) 0.72110(15) 1.09999(14) 0.0175(4) Uani 1 1 d . . . 
C10 C 0.97035(17) 0.86512(16) 0.87739(15) 0.0200(4) Uani 1 1 d . . . 
C11 C 1.0307(2) 0.90917(19) 0.91322(17) 0.0310(5) Uani 1 1 d . . . 
H11 H 1.0419 0.8839 0.9823 0.037 Uiso 1 1 calc R . . 
C12 C 1.0742(2) 0.9896(2) 0.84838(19) 0.0397(6) Uani 1 1 d . . . 
H12 H 1.1167 1.0182 0.8732 0.048 Uiso 1 1 calc R . . 
C13 C 1.0562(2) 1.0286(2) 0.74798(18) 0.0356(6) Uani 1 1 d . . . 
H13 H 1.0848 1.0849 0.7039 0.043 Uiso 1 1 calc R . . 
C14 C 0.99632(18) 0.98529(17) 0.71141(16) 0.0260(4) Uani 1 1 d . . . 
H14 H 0.9840 1.0117 0.6423 0.031 Uiso 1 1 calc R . . 
C15 C 0.95450(17) 0.90307(16) 0.77640(15) 0.0209(4) Uani 1 1 d . . . 
H15 H 0.9147 0.8726 0.7514 0.025 Uiso 1 1 calc R . . 
C16 C 0.93505(16) 0.53168(15) 1.17007(14) 0.0171(4) Uani 1 1 d . . . 
C17 C 0.86068(18) 0.52808(16) 1.24705(15) 0.0226(4) Uani 1 1 d . . . 
H17 H 0.7962 0.5880 1.2388 0.027 Uiso 1 1 calc R . . 
C18 C 0.88051(19) 0.43732(18) 1.33553(16) 0.0292(5) Uani 1 1 d . . . 
H18 H 0.8296 0.4353 1.3877 0.035 Uiso 1 1 calc R . . 
C19 C 0.97444(19) 0.34941(17) 1.34809(16) 0.0281(5) Uani 1 1 d . . . 
H19 H 0.9875 0.2872 1.4086 0.034 Uiso 1 1 calc R . . 
C20 C 1.04900(18) 0.35234(16) 1.27254(16) 0.0248(4) Uani 1 1 d . . . 
H20 H 1.1135 0.2923 1.2813 0.030 Uiso 1 1 calc R . . 
C21 C 1.02955(17) 0.44336(16) 1.18363(15) 0.0216(4) Uani 1 1 d . . . 
H21 H 1.0811 0.4452 1.1319 0.026 Uiso 1 1 calc R . . 
C22 C 0.63785(18) 0.69827(16) 0.68562(14) 0.0215(4) Uani 1 1 d . . . 
C23 C 0.55233(19) 0.79557(19) 0.64982(16) 0.0279(5) Uani 1 1 d . . . 
H23 H 0.5207 0.8283 0.6928 0.033 Uiso 1 1 calc R . . 
C24 C 0.5125(2) 0.8457(2) 0.55207(18) 0.0421(7) Uani 1 1 d . . . 
H24 H 0.4532 0.9117 0.5286 0.051 Uiso 1 1 calc R . . 
C25 C 0.5593(2) 0.7992(3) 0.48975(18) 0.0464(8) Uani 1 1 d . . . 
H25 H 0.5310 0.8323 0.4233 0.056 Uiso 1 1 calc R . . 
C26 C 0.6473(2) 0.7045(2) 0.52291(18) 0.0416(7) Uani 1 1 d . . . 
H26 H 0.6811 0.6740 0.4787 0.050 Uiso 1 1 calc R . . 
C27 C 0.6864(2) 0.6539(2) 0.62085(16) 0.0318(5) Uani 1 1 d . . . 
H27 H 0.7467 0.5886 0.6435 0.038 Uiso 1 1 calc R . . 
C28 C 0.70650(17) 0.41483(14) 1.03629(14) 0.0171(4) Uani 1 1 d . . . 
C29 C 0.79045(17) 0.37154(15) 1.11113(14) 0.0184(4) Uani 1 1 d . . . 
H29 H 0.8488 0.4038 1.1039 0.022 Uiso 1 1 calc R . . 
C30 C 0.78875(18) 0.28112(16) 1.19642(15) 0.0224(4) Uani 1 1 d . . . 
H30 H 0.8446 0.2531 1.2481 0.027 Uiso 1 1 calc R . . 
C31 C 0.70617(19) 0.23180(16) 1.20633(15) 0.0249(4) Uani 1 1 d . . . 
H31 H 0.7061 0.1695 1.2643 0.030 Uiso 1 1 calc R . . 
C32 C 0.62391(19) 0.27329(16) 1.13191(15) 0.0248(4) Uani 1 1 d . . . 
H32 H 0.5672 0.2394 1.1388 0.030 Uiso 1 1 calc R . . 
C33 C 0.62371(18) 0.36429(16) 1.04704(15) 0.0207(4) Uani 1 1 d . . . 
H33 H 0.5670 0.3923 0.9960 0.025 Uiso 1 1 calc R . . 
C34 C 0.40139(16) 0.97970(15) 0.89635(15) 0.0183(4) Uani 1 1 d . . . 
C35 C 0.39024(18) 1.00200(16) 0.79759(15) 0.0225(4) Uani 1 1 d . . . 
H35 H 0.4325 0.9508 0.7742 0.027 Uiso 1 1 calc R . . 
C36 C 0.31751(18) 1.09879(17) 0.73264(16) 0.0250(4) Uani 1 1 d . . . 
H36 H 0.3096 1.1133 0.6654 0.030 Uiso 1 1 calc R . . 
C37 C 0.25666(19) 1.17385(17) 0.76653(17) 0.0275(5) Uani 1 1 d . . . 
H37 H 0.2078 1.2403 0.7222 0.033 Uiso 1 1 calc R . . 
C38 C 0.26694(19) 1.15232(16) 0.86453(18) 0.0268(5) Uani 1 1 d . . . 
H38 H 0.2248 1.2038 0.8875 0.032 Uiso 1 1 calc R . . 
C39 C 0.33852(17) 1.05575(16) 0.92942(16) 0.0217(4) Uani 1 1 d . . . 
H39 H 0.3449 1.0412 0.9968 0.026 Uiso 1 1 calc R . . 
C40 C 0.54640(17) 0.63190(15) 1.19934(14) 0.0187(4) Uani 1 1 d . . . 
C41 C 0.55517(17) 0.52909(16) 1.21440(15) 0.0198(4) Uani 1 1 d . . . 
H41 H 0.5526 0.5142 1.1595 0.024 Uiso 1 1 calc R . . 
C42 C 0.56771(18) 0.44803(17) 1.30926(15) 0.0240(4) Uani 1 1 d . . . 
H42 H 0.5717 0.3784 1.3190 0.029 Uiso 1 1 calc R . . 
C43 C 0.57443(19) 0.46850(18) 1.38936(15) 0.0273(5) Uani 1 1 d . . . 
H43 H 0.5848 0.4126 1.4540 0.033 Uiso 1 1 calc R . . 
C44 C 0.5661(2) 0.57051(19) 1.37546(16) 0.0290(5) Uani 1 1 d . . . 
H44 H 0.5703 0.5845 1.4307 0.035 Uiso 1 1 calc R . . 
C45 C 0.55169(18) 0.65252(17) 1.28087(15) 0.0241(4) Uani 1 1 d . . . 
H45 H 0.5454 0.7225 1.2716 0.029 Uiso 1 1 calc R . . 
C46 C 0.73114(16) 0.98590(15) 0.63559(14) 0.0178(4) Uani 1 1 d . . . 
C47 C 0.70741(18) 1.07351(16) 0.65834(15) 0.0229(4) Uani 1 1 d . . . 
C48 C 0.7253(2) 1.16926(17) 0.59523(17) 0.0301(5) Uani 1 1 d . . . 
H48 H 0.7080 1.2261 0.6142 0.036 Uiso 1 1 calc R . . 
C49 C 0.7689(2) 1.18101(19) 0.50361(17) 0.0344(6) Uani 1 1 d . . . 
H49 H 0.7805 1.2467 0.4588 0.041 Uiso 1 1 calc R . . 
C50 C 0.79526(19) 1.09764(18) 0.47777(16) 0.0291(5) Uani 1 1 d . . . 
H50 H 0.8266 1.1052 0.4156 0.035 Uiso 1 1 calc R . . 
C51 C 0.77613(18) 1.00214(16) 0.54235(15) 0.0228(4) Uani 1 1 d . . . 
  
loop_ 
 _atom_site_aniso_label 
 _atom_site_aniso_U_11 
 _atom_site_aniso_U_22 
 _atom_site_aniso_U_33 
 _atom_site_aniso_U_23 
 _atom_site_aniso_U_13 
 _atom_site_aniso_U_12 
Fe1 0.01651(14) 0.01413(13) 0.01402(13) -0.00392(10) 0.00162(10) -0.00592(10) 
Cl1 0.0329(3) 0.0251(3) 0.0293(3) -0.0150(2) 0.0048(2) -0.0092(2) 
Cl2 0.0352(3) 0.0337(3) 0.0206(2) -0.0119(2) 0.0038(2) -0.0097(2) 
O1 0.0266(8) 0.0172(7) 0.0153(6) -0.0036(5) 0.0023(6) -0.0111(6) 
N1 0.0179(8) 0.0149(7) 0.0146(7) -0.0045(6) 0.0016(6) -0.0066(6) 
N2 0.0172(8) 0.0137(7) 0.0140(7) -0.0042(6) 0.0010(6) -0.0060(6) 
N3 0.0176(8) 0.0163(7) 0.0132(7) -0.0047(6) 0.0014(6) -0.0058(6) 
N4 0.0157(7) 0.0134(7) 0.0161(7) -0.0046(6) 0.0022(6) -0.0062(6) 
N5 0.0170(8) 0.0144(7) 0.0163(7) -0.0047(6) 0.0007(6) -0.0049(6) 
N6 0.0172(8) 0.0141(7) 0.0150(7) -0.0042(6) 0.0014(6) -0.0054(6) 
B1 0.0146(10) 0.0161(10) 0.0133(9) -0.0047(8) 0.0002(7) -0.0058(8) 
C1 0.0164(9) 0.0173(9) 0.0179(9) -0.0065(7) 0.0015(7) -0.0064(7) 
C2 0.0171(9) 0.0200(9) 0.0186(9) -0.0066(8) -0.0008(7) -0.0061(8) 
C3 0.0151(9) 0.0168(9) 0.0167(8) -0.0065(7) 0.0009(7) -0.0044(7) 
C4 0.0163(9) 0.0204(9) 0.0176(9) -0.0077(8) 0.0037(7) -0.0082(8) 
C5 0.0226(10) 0.0185(9) 0.0187(9) -0.0082(8) 0.0026(8) -0.0086(8) 
C6 0.0164(9) 0.0154(9) 0.0199(9) -0.0076(7) 0.0037(7) -0.0070(7) 
C7 0.0151(9) 0.0151(8) 0.0202(9) -0.0087(7) 0.0019(7) -0.0048(7) 
C8 0.0205(10) 0.0208(9) 0.0202(9) -0.0101(8) 0.0053(8) -0.0084(8) 
C9 0.0177(9) 0.0216(9) 0.0179(9) -0.0108(8) 0.0043(7) -0.0097(8) 
C10 0.0180(9) 0.0188(9) 0.0215(9) -0.0051(8) 0.0014(8) -0.0085(8) 
C11 0.0374(13) 0.0341(12) 0.0262(11) -0.0085(10) 0.0010(10) -0.0234(11) 
C12 0.0488(16) 0.0429(15) 0.0349(13) -0.0090(11) -0.0006(12) -0.0338(13) 
C13 0.0379(14) 0.0352(13) 0.0305(12) -0.0008(10) 0.0024(10) -0.0263(11) 
C14 0.0212(10) 0.0266(11) 0.0225(10) -0.0027(9) 0.0002(8) -0.0083(9) 
C15 0.0165(9) 0.0204(10) 0.0216(10) -0.0044(8) 0.0012(8) -0.0070(8) 
C16 0.0169(9) 0.0170(9) 0.0155(8) -0.0044(7) -0.0005(7) -0.0059(7) 
C17 0.0213(10) 0.0201(10) 0.0209(10) -0.0059(8) 0.0014(8) -0.0036(8) 
C18 0.0253(11) 0.0314(12) 0.0191(10) -0.0015(9) 0.0048(9) -0.0077(9) 
C19 0.0240(11) 0.0231(11) 0.0249(11) 0.0007(9) -0.0017(9) -0.0064(9) 
C20 0.0199(10) 0.0178(10) 0.0292(11) -0.0041(8) -0.0017(8) -0.0039(8) 
C21 0.0179(10) 0.0227(10) 0.0228(10) -0.0081(8) 0.0024(8) -0.0071(8) 
C22 0.0249(10) 0.0253(10) 0.0170(9) -0.0053(8) 0.0009(8) -0.0165(9) 
C23 0.0240(11) 0.0349(12) 0.0224(10) -0.0060(9) 0.0000(9) -0.0146(10) 
C24 0.0243(12) 0.0553(17) 0.0273(12) 0.0055(11) -0.0059(10) -0.0183(12) 
C25 0.0345(14) 0.080(2) 0.0201(11) -0.0036(13) -0.0027(10) -0.0359(15) 
C26 0.0536(17) 0.0644(19) 0.0225(12) -0.0202(12) 0.0070(11) -0.0372(15) 
C27 0.0405(14) 0.0385(13) 0.0237(11) -0.0147(10) 0.0025(10) -0.0200(11) 
C28 0.0201(9) 0.0121(8) 0.0178(9) -0.0052(7) 0.0033(7) -0.0058(7) 
C29 0.0166(9) 0.0175(9) 0.0215(9) -0.0083(8) 0.0016(7) -0.0059(7) 
C30 0.0233(10) 0.0186(10) 0.0213(10) -0.0061(8) -0.0032(8) -0.0035(8) 
C31 0.0317(12) 0.0182(10) 0.0220(10) -0.0032(8) 0.0007(9) -0.0115(9) 
C32 0.0308(12) 0.0223(10) 0.0219(10) -0.0044(8) -0.0005(9) -0.0155(9) 
C33 0.0231(10) 0.0202(10) 0.0195(9) -0.0061(8) -0.0009(8) -0.0103(8) 
C34 0.0159(9) 0.0169(9) 0.0217(9) -0.0074(8) 0.0017(7) -0.0060(7) 
C35 0.0199(10) 0.0209(10) 0.0253(10) -0.0095(8) 0.0034(8) -0.0058(8) 
C36 0.0242(11) 0.0246(11) 0.0216(10) -0.0049(8) -0.0006(8) -0.0079(9) 
C37 0.0218(11) 0.0186(10) 0.0358(12) -0.0058(9) -0.0023(9) -0.0054(8) 
C38 0.0226(11) 0.0167(10) 0.0416(13) -0.0146(10) 0.0010(9) -0.0032(8) 
C39 0.0206(10) 0.0193(10) 0.0262(10) -0.0110(8) 0.0005(8) -0.0054(8) 
C40 0.0168(9) 0.0200(9) 0.0183(9) -0.0072(8) 0.0054(7) -0.0069(8) 
C41 0.0199(10) 0.0214(10) 0.0202(9) -0.0092(8) 0.0027(8) -0.0091(8) 
C42 0.0233(11) 0.0217(10) 0.0240(10) -0.0060(8) 0.0059(8) -0.0098(9) 
C43 0.0283(12) 0.0292(11) 0.0181(10) -0.0051(9) 0.0065(9) -0.0095(9) 
C44 0.0326(12) 0.0370(13) 0.0190(10) -0.0135(9) 0.0068(9) -0.0121(10) 
C45 0.0275(11) 0.0244(10) 0.0238(10) -0.0127(9) 0.0072(9) -0.0106(9) 
C46 0.0156(9) 0.0159(9) 0.0183(9) -0.0026(7) -0.0020(7) -0.0061(7) 
C47 0.0228(10) 0.0195(10) 0.0230(10) -0.0051(8) -0.0004(8) -0.0072(8) 
C48 0.0316(12) 0.0198(10) 0.0340(12) -0.0033(9) -0.0081(10) -0.0104(9) 
C49 0.0335(13) 0.0265(12) 0.0313(12) 0.0062(10) -0.0049(10) -0.0189(10) 
C50 0.0263(11) 0.0306(12) 0.0202(10) 0.0018(9) -0.0023(9) -0.0127(10) 
C51 0.0203(10) 0.0241(10) 0.0178(9) -0.0022(8) -0.0013(8) -0.0079(8) 
  
_geom_special_details 
; 
 All esds (except the esd in the dihedral angle between two l.s. planes) 
 are estimated using the full covariance matrix.  The cell esds are taken 
 into account individually in the estimation of esds in distances, angles 
 and torsion angles; correlations between esds in cell parameters are only 
 used when they are defined by crystal symmetry.  An approximate (isotropic) 
 treatment of cell esds is used for estimating esds involving l.s. planes. 
; 
  
loop_ 
 _geom_bond_atom_site_label_1 
 _geom_bond_atom_site_label_2 
 _geom_bond_distance 
 _geom_bond_site_symmetry_2 
 _geom_bond_publ_flag 
Fe1 O1 1.8995(14) . ? 
Fe1 N5 2.0973(16) . ? 
Fe1 N1 2.1135(17) . ? 
Fe1 N3 2.1250(16) . ? 
Fe1 Cl1 2.8618(8) . ? 
Cl1 C47 1.748(2) . ? 
Cl2 C51 1.736(2) . ? 
O1 C46 1.313(2) . ? 
N1 C1 1.351(2) . ? 
N1 N2 1.374(2) . ? 
N2 C3 1.354(2) . ? 
N2 B1 1.541(3) . ? 
N3 C4 1.344(2) . ? 
N3 N4 1.371(2) . ? 
N4 C6 1.361(2) . ? 
N4 B1 1.549(3) . ? 
N5 C7 1.349(2) . ? 
N5 N6 1.381(2) . ? 
N6 C9 1.351(2) . ? 
N6 B1 1.552(3) . ? 
B1 H1 1.0000 . ? 
C1 C2 1.395(3) . ? 
C1 C10 1.474(3) . ? 
C2 C3 1.388(3) . ? 
C2 H2 0.9500 . ? 
C3 C16 1.477(3) . ? 
C4 C5 1.394(3) . ? 
C4 C22 1.472(3) . ? 
C5 C6 1.383(3) . ? 
C5 H5 0.9500 . ? 
C6 C28 1.477(3) . ? 
C7 C8 1.394(3) . ? 
C7 C34 1.473(3) . ? 
C8 C9 1.384(3) . ? 
C8 H8 0.9500 . ? 
C9 C40 1.479(3) . ? 
C10 C15 1.386(3) . ? 
C10 C11 1.395(3) . ? 
C11 C12 1.385(3) . ? 
C11 H11 0.9500 . ? 
C12 C13 1.380(3) . ? 
C12 H12 0.9500 . ? 
C13 C14 1.389(3) . ? 
C13 H13 0.9500 . ? 
C14 C15 1.390(3) . ? 
C14 H14 0.9500 . ? 
C15 H15 0.9500 . ? 
C16 C21 1.392(3) . ? 
C16 C17 1.396(3) . ? 
C17 C18 1.387(3) . ? 
C17 H17 0.9500 . ? 
C18 C19 1.387(3) . ? 
C18 H18 0.9500 . ? 
C19 C20 1.382(3) . ? 
C19 H19 0.9500 . ? 
C20 C21 1.393(3) . ? 
C20 H20 0.9500 . ? 
C21 H21 0.9500 . ? 
C22 C27 1.386(3) . ? 
C22 C23 1.390(3) . ? 
C23 C24 1.390(3) . ? 
C23 H23 0.9500 . ? 
C24 C25 1.371(4) . ? 
C24 H24 0.9500 . ? 
C25 C26 1.380(4) . ? 
C25 H25 0.9500 . ? 
C26 C27 1.390(3) . ? 
C26 H26 0.9500 . ? 
C27 H27 0.9500 . ? 
C28 C29 1.395(3) . ? 
C28 C33 1.396(3) . ? 
C29 C30 1.392(3) . ? 
C29 H29 0.9500 . ? 
C30 C31 1.383(3) . ? 
C30 H30 0.9500 . ? 
C31 C32 1.380(3) . ? 
C31 H31 0.9500 . ? 
C32 C33 1.388(3) . ? 
C32 H32 0.9500 . ? 
C33 H33 0.9500 . ? 
C34 C35 1.391(3) . ? 
C34 C39 1.396(3) . ? 
C35 C36 1.393(3) . ? 
C35 H35 0.9500 . ? 
C36 C37 1.387(3) . ? 
C36 H36 0.9500 . ? 
C37 C38 1.381(3) . ? 
C37 H37 0.9500 . ? 
C38 C39 1.386(3) . ? 
C38 H38 0.9500 . ? 
C39 H39 0.9500 . ? 
C40 C41 1.390(3) . ? 
C40 C45 1.400(3) . ? 
C41 C42 1.389(3) . ? 
C41 H41 0.9500 . ? 
C42 C43 1.381(3) . ? 
C42 H42 0.9500 . ? 
C43 C44 1.386(3) . ? 
C43 H43 0.9500 . ? 
C44 C45 1.391(3) . ? 
C44 H44 0.9500 . ? 
C45 H45 0.9500 . ? 
C46 C51 1.405(3) . ? 
C46 C47 1.405(3) . ? 
C47 C48 1.381(3) . ? 
C48 C49 1.388(3) . ? 
C48 H48 0.9500 . ? 
C49 C50 1.373(3) . ? 
C49 H49 0.9500 . ? 
C50 C51 1.390(3) . ? 
C50 H50 0.9500 . ? 
  
loop_ 
 _geom_angle_atom_site_label_1 
 _geom_angle_atom_site_label_2 
 _geom_angle_atom_site_label_3 
 _geom_angle 
 _geom_angle_site_symmetry_1 
 _geom_angle_site_symmetry_3 
 _geom_angle_publ_flag 
O1 Fe1 N5 147.67(7) . . ? 
O1 Fe1 N1 119.13(6) . . ? 
N5 Fe1 N1 92.34(6) . . ? 
O1 Fe1 N3 98.34(6) . . ? 
N5 Fe1 N3 86.85(6) . . ? 
N1 Fe1 N3 92.21(6) . . ? 
O1 Fe1 Cl1 72.95(4) . . ? 
N5 Fe1 Cl1 95.34(4) . . ? 
N1 Fe1 Cl1 100.76(4) . . ? 
N3 Fe1 Cl1 166.73(5) . . ? 
C47 Cl1 Fe1 92.45(7) . . ? 
C46 O1 Fe1 133.66(13) . . ? 
C1 N1 N2 106.28(15) . . ? 
C1 N1 Fe1 140.27(13) . . ? 
N2 N1 Fe1 113.34(11) . . ? 
C3 N2 N1 110.37(15) . . ? 
C3 N2 B1 128.63(15) . . ? 
N1 N2 B1 121.00(15) . . ? 
C4 N3 N4 106.58(15) . . ? 
C4 N3 Fe1 139.13(13) . . ? 
N4 N3 Fe1 114.27(11) . . ? 
C6 N4 N3 110.03(15) . . ? 
C6 N4 B1 130.04(16) . . ? 
N3 N4 B1 119.57(14) . . ? 
C7 N5 N6 106.60(15) . . ? 
C7 N5 Fe1 140.68(13) . . ? 
N6 N5 Fe1 112.44(11) . . ? 
C9 N6 N5 109.78(15) . . ? 
C9 N6 B1 128.35(16) . . ? 
N5 N6 B1 121.86(15) . . ? 
N2 B1 N4 110.00(15) . . ? 
N2 B1 N6 109.96(15) . . ? 
N4 B1 N6 108.54(15) . . ? 
N2 B1 H1 109.4 . . ? 
N4 B1 H1 109.4 . . ? 
N6 B1 H1 109.4 . . ? 
N1 C1 C2 109.86(16) . . ? 
N1 C1 C10 123.32(17) . . ? 
C2 C1 C10 126.81(18) . . ? 
C3 C2 C1 106.05(17) . . ? 
C3 C2 H2 127.0 . . ? 
C1 C2 H2 127.0 . . ? 
N2 C3 C2 107.44(16) . . ? 
N2 C3 C16 124.19(16) . . ? 
C2 C3 C16 128.37(17) . . ? 
N3 C4 C5 109.88(17) . . ? 
N3 C4 C22 123.66(17) . . ? 
C5 C4 C22 126.32(18) . . ? 
C6 C5 C4 106.23(17) . . ? 
C6 C5 H5 126.9 . . ? 
C4 C5 H5 126.9 . . ? 
N4 C6 C5 107.27(17) . . ? 
N4 C6 C28 124.30(17) . . ? 
C5 C6 C28 128.20(17) . . ? 
N5 C7 C8 109.53(17) . . ? 
N5 C7 C34 123.01(17) . . ? 
C8 C7 C34 127.37(17) . . ? 
C9 C8 C7 106.29(17) . . ? 
C9 C8 H8 126.9 . . ? 
C7 C8 H8 126.9 . . ? 
N6 C9 C8 107.78(17) . . ? 
N6 C9 C40 124.21(17) . . ? 
C8 C9 C40 128.00(17) . . ? 
C15 C10 C11 119.18(18) . . ? 
C15 C10 C1 121.53(18) . . ? 
C11 C10 C1 119.20(18) . . ? 
C12 C11 C10 120.1(2) . . ? 
C12 C11 H11 119.9 . . ? 
C10 C11 H11 119.9 . . ? 
C13 C12 C11 120.4(2) . . ? 
C13 C12 H12 119.8 . . ? 
C11 C12 H12 119.8 . . ? 
C12 C13 C14 119.9(2) . . ? 
C12 C13 H13 120.0 . . ? 
C14 C13 H13 120.0 . . ? 
C13 C14 C15 119.7(2) . . ? 
C13 C14 H14 120.2 . . ? 
C15 C14 H14 120.2 . . ? 
C10 C15 C14 120.62(19) . . ? 
C10 C15 H15 119.7 . . ? 
C14 C15 H15 119.7 . . ? 
C21 C16 C17 119.10(18) . . ? 
C21 C16 C3 120.08(17) . . ? 
C17 C16 C3 120.79(17) . . ? 
C18 C17 C16 120.3(2) . . ? 
C18 C17 H17 119.9 . . ? 
C16 C17 H17 119.9 . . ? 
C17 C18 C19 120.2(2) . . ? 
C17 C18 H18 119.9 . . ? 
C19 C18 H18 119.9 . . ? 
C20 C19 C18 120.0(2) . . ? 
C20 C19 H19 120.0 . . ? 
C18 C19 H19 120.0 . . ? 
C19 C20 C21 120.0(2) . . ? 
C19 C20 H20 120.0 . . ? 
C21 C20 H20 120.0 . . ? 
C16 C21 C20 120.41(19) . . ? 
C16 C21 H21 119.8 . . ? 
C20 C21 H21 119.8 . . ? 
C27 C22 C23 118.7(2) . . ? 
C27 C22 C4 120.1(2) . . ? 
C23 C22 C4 121.05(19) . . ? 
C22 C23 C24 120.9(2) . . ? 
C22 C23 H23 119.5 . . ? 
C24 C23 H23 119.5 . . ? 
C25 C24 C23 119.5(3) . . ? 
C25 C24 H24 120.2 . . ? 
C23 C24 H24 120.2 . . ? 
C24 C25 C26 120.4(2) . . ? 
C24 C25 H25 119.8 . . ? 
C26 C25 H25 119.8 . . ? 
C25 C26 C27 120.0(3) . . ? 
C25 C26 H26 120.0 . . ? 
C27 C26 H26 120.0 . . ? 
C22 C27 C26 120.3(2) . . ? 
C22 C27 H27 119.9 . . ? 
C26 C27 H27 119.9 . . ? 
C29 C28 C33 119.09(17) . . ? 
C29 C28 C6 123.13(17) . . ? 
C33 C28 C6 117.78(18) . . ? 
C30 C29 C28 120.03(18) . . ? 
C30 C29 H29 120.0 . . ? 
C28 C29 H29 120.0 . . ? 
C31 C30 C29 120.35(19) . . ? 
C31 C30 H30 119.8 . . ? 
C29 C30 H30 119.8 . . ? 
C32 C31 C30 119.90(19) . . ? 
C32 C31 H31 120.1 . . ? 
C30 C31 H31 120.1 . . ? 
C31 C32 C33 120.31(19) . . ? 
C31 C32 H32 119.8 . . ? 
C33 C32 H32 119.8 . . ? 
C32 C33 C28 120.29(19) . . ? 
C32 C33 H33 119.9 . . ? 
C28 C33 H33 119.9 . . ? 
C35 C34 C39 118.99(19) . . ? 
C35 C34 C7 121.53(18) . . ? 
C39 C34 C7 119.33(18) . . ? 
C34 C35 C36 120.5(2) . . ? 
C34 C35 H35 119.8 . . ? 
C36 C35 H35 119.8 . . ? 
C37 C36 C35 119.7(2) . . ? 
C37 C36 H36 120.1 . . ? 
C35 C36 H36 120.1 . . ? 
C38 C37 C36 120.2(2) . . ? 
C38 C37 H37 119.9 . . ? 
C36 C37 H37 119.9 . . ? 
C37 C38 C39 120.2(2) . . ? 
C37 C38 H38 119.9 . . ? 
C39 C38 H38 119.9 . . ? 
C38 C39 C34 120.4(2) . . ? 
C38 C39 H39 119.8 . . ? 
C34 C39 H39 119.8 . . ? 
C41 C40 C45 119.19(18) . . ? 
C41 C40 C9 122.56(18) . . ? 
C45 C40 C9 118.25(18) . . ? 
C42 C41 C40 120.44(19) . . ? 
C42 C41 H41 119.8 . . ? 
C40 C41 H41 119.8 . . ? 
C43 C42 C41 120.1(2) . . ? 
C43 C42 H42 119.9 . . ? 
C41 C42 H42 119.9 . . ? 
C42 C43 C44 120.1(2) . . ? 
C42 C43 H43 120.0 . . ? 
C44 C43 H43 120.0 . . ? 
C43 C44 C45 120.2(2) . . ? 
C43 C44 H44 119.9 . . ? 
C45 C44 H44 119.9 . . ? 
C44 C45 C40 120.0(2) . . ? 
C44 C45 H45 120.0 . . ? 
C40 C45 H45 120.0 . . ? 
O1 C46 C51 121.87(18) . . ? 
O1 C46 C47 123.37(18) . . ? 
C51 C46 C47 114.74(17) . . ? 
C48 C47 C46 123.8(2) . . ? 
C48 C47 Cl1 120.08(18) . . ? 
C46 C47 Cl1 116.06(15) . . ? 
C47 C48 C49 118.8(2) . . ? 
C47 C48 H48 120.6 . . ? 
C49 C48 H48 120.6 . . ? 
C50 C49 C48 120.0(2) . . ? 
C50 C49 H49 120.0 . . ? 
C48 C49 H49 120.0 . . ? 
C49 C50 C51 120.2(2) . . ? 
C49 C50 H50 119.9 . . ? 
C51 C50 H50 119.9 . . ? 
C50 C51 C46 122.4(2) . . ? 
C50 C51 Cl2 119.82(17) . . ? 
C46 C51 Cl2 117.73(15) . . ? 
  
loop_ 
 _geom_torsion_atom_site_label_1 
 _geom_torsion_atom_site_label_2 
 _geom_torsion_atom_site_label_3 
 _geom_torsion_atom_site_label_4 
 _geom_torsion 
 _geom_torsion_site_symmetry_1 
 _geom_torsion_site_symmetry_2 
 _geom_torsion_site_symmetry_3 
 _geom_torsion_site_symmetry_4 
 _geom_torsion_publ_flag 
O1 Fe1 Cl1 C47 -8.02(8) . . . . ? 
N5 Fe1 Cl1 C47 -157.22(8) . . . . ? 
N1 Fe1 Cl1 C47 109.37(8) . . . . ? 
N3 Fe1 Cl1 C47 -58.2(2) . . . . ? 
N5 Fe1 O1 C46 85.3(2) . . . . ? 
N1 Fe1 O1 C46 -80.07(19) . . . . ? 
N3 Fe1 O1 C46 -177.32(17) . . . . ? 
Cl1 Fe1 O1 C46 12.95(17) . . . . ? 
O1 Fe1 N1 C1 33.6(2) . . . . ? 
N5 Fe1 N1 C1 -138.7(2) . . . . ? 
N3 Fe1 N1 C1 134.4(2) . . . . ? 
Cl1 Fe1 N1 C1 -42.8(2) . . . . ? 
O1 Fe1 N1 N2 -141.69(11) . . . . ? 
N5 Fe1 N1 N2 46.06(12) . . . . ? 
N3 Fe1 N1 N2 -40.88(12) . . . . ? 
Cl1 Fe1 N1 N2 141.95(11) . . . . ? 
C1 N1 N2 C3 0.4(2) . . . . ? 
Fe1 N1 N2 C3 177.20(12) . . . . ? 
C1 N1 N2 B1 179.77(16) . . . . ? 
Fe1 N1 N2 B1 -3.4(2) . . . . ? 
O1 Fe1 N3 C4 -21.9(2) . . . . ? 
N5 Fe1 N3 C4 126.0(2) . . . . ? 
N1 Fe1 N3 C4 -141.7(2) . . . . ? 
Cl1 Fe1 N3 C4 26.1(3) . . . . ? 
O1 Fe1 N3 N4 160.16(12) . . . . ? 
N5 Fe1 N3 N4 -51.92(12) . . . . ? 
N1 Fe1 N3 N4 40.30(12) . . . . ? 
Cl1 Fe1 N3 N4 -151.89(14) . . . . ? 
C4 N3 N4 C6 0.1(2) . . . . ? 
Fe1 N3 N4 C6 178.67(12) . . . . ? 
C4 N3 N4 B1 -173.75(16) . . . . ? 
Fe1 N3 N4 B1 4.9(2) . . . . ? 
O1 Fe1 N5 C7 -35.1(3) . . . . ? 
N1 Fe1 N5 C7 132.2(2) . . . . ? 
N3 Fe1 N5 C7 -135.7(2) . . . . ? 
Cl1 Fe1 N5 C7 31.1(2) . . . . ? 
O1 Fe1 N5 N6 152.28(11) . . . . ? 
N1 Fe1 N5 N6 -40.44(12) . . . . ? 
N3 Fe1 N5 N6 51.65(12) . . . . ? 
Cl1 Fe1 N5 N6 -141.48(11) . . . . ? 
C7 N5 N6 C9 -1.3(2) . . . . ? 
Fe1 N5 N6 C9 173.86(12) . . . . ? 
C7 N5 N6 B1 178.51(16) . . . . ? 
Fe1 N5 N6 B1 -6.4(2) . . . . ? 
C3 N2 B1 N4 -117.6(2) . . . . ? 
N1 N2 B1 N4 63.1(2) . . . . ? 
C3 N2 B1 N6 122.91(19) . . . . ? 
N1 N2 B1 N6 -56.4(2) . . . . ? 
C6 N4 B1 N2 124.0(2) . . . . ? 
N3 N4 B1 N2 -63.6(2) . . . . ? 
C6 N4 B1 N6 -115.6(2) . . . . ? 
N3 N4 B1 N6 56.8(2) . . . . ? 
C9 N6 B1 N2 -116.8(2) . . . . ? 
N5 N6 B1 N2 63.5(2) . . . . ? 
C9 N6 B1 N4 122.87(19) . . . . ? 
N5 N6 B1 N4 -56.9(2) . . . . ? 
N2 N1 C1 C2 0.0(2) . . . . ? 
Fe1 N1 C1 C2 -175.49(15) . . . . ? 
N2 N1 C1 C10 -179.08(17) . . . . ? 
Fe1 N1 C1 C10 5.4(3) . . . . ? 
N1 C1 C2 C3 -0.3(2) . . . . ? 
C10 C1 C2 C3 178.72(19) . . . . ? 
N1 N2 C3 C2 -0.5(2) . . . . ? 
B1 N2 C3 C2 -179.91(17) . . . . ? 
N1 N2 C3 C16 178.73(17) . . . . ? 
B1 N2 C3 C16 -0.6(3) . . . . ? 
C1 C2 C3 N2 0.5(2) . . . . ? 
C1 C2 C3 C16 -178.72(19) . . . . ? 
N4 N3 C4 C5 -0.8(2) . . . . ? 
Fe1 N3 C4 C5 -178.84(15) . . . . ? 
N4 N3 C4 C22 175.11(17) . . . . ? 
Fe1 N3 C4 C22 -3.0(3) . . . . ? 
N3 C4 C5 C6 1.2(2) . . . . ? 
C22 C4 C5 C6 -174.56(19) . . . . ? 
N3 N4 C6 C5 0.7(2) . . . . ? 
B1 N4 C6 C5 173.63(18) . . . . ? 
N3 N4 C6 C28 -174.21(17) . . . . ? 
B1 N4 C6 C28 -1.3(3) . . . . ? 
C4 C5 C6 N4 -1.1(2) . . . . ? 
C4 C5 C6 C28 173.51(19) . . . . ? 
N6 N5 C7 C8 1.5(2) . . . . ? 
Fe1 N5 C7 C8 -171.42(15) . . . . ? 
N6 N5 C7 C34 -175.34(16) . . . . ? 
Fe1 N5 C7 C34 11.8(3) . . . . ? 
N5 C7 C8 C9 -1.1(2) . . . . ? 
C34 C7 C8 C9 175.50(18) . . . . ? 
N5 N6 C9 C8 0.6(2) . . . . ? 
B1 N6 C9 C8 -179.17(17) . . . . ? 
N5 N6 C9 C40 -177.99(17) . . . . ? 
B1 N6 C9 C40 2.3(3) . . . . ? 
C7 C8 C9 N6 0.3(2) . . . . ? 
C7 C8 C9 C40 178.81(19) . . . . ? 
N1 C1 C10 C15 -40.8(3) . . . . ? 
C2 C1 C10 C15 140.3(2) . . . . ? 
N1 C1 C10 C11 142.7(2) . . . . ? 
C2 C1 C10 C11 -36.2(3) . . . . ? 
C15 C10 C11 C12 -0.1(4) . . . . ? 
C1 C10 C11 C12 176.5(2) . . . . ? 
C10 C11 C12 C13 1.4(4) . . . . ? 
C11 C12 C13 C14 -1.5(4) . . . . ? 
C12 C13 C14 C15 0.2(4) . . . . ? 
C11 C10 C15 C14 -1.1(3) . . . . ? 
C1 C10 C15 C14 -177.63(19) . . . . ? 
C13 C14 C15 C10 1.1(3) . . . . ? 
N2 C3 C16 C21 120.7(2) . . . . ? 
C2 C3 C16 C21 -60.1(3) . . . . ? 
N2 C3 C16 C17 -61.4(3) . . . . ? 
C2 C3 C16 C17 117.8(2) . . . . ? 
C21 C16 C17 C18 -0.4(3) . . . . ? 
C3 C16 C17 C18 -178.37(19) . . . . ? 
C16 C17 C18 C19 0.0(3) . . . . ? 
C17 C18 C19 C20 0.4(4) . . . . ? 
C18 C19 C20 C21 -0.3(3) . . . . ? 
C17 C16 C21 C20 0.6(3) . . . . ? 
C3 C16 C21 C20 178.49(19) . . . . ? 
C19 C20 C21 C16 -0.2(3) . . . . ? 
N3 C4 C22 C27 139.6(2) . . . . ? 
C5 C4 C22 C27 -45.2(3) . . . . ? 
N3 C4 C22 C23 -45.7(3) . . . . ? 
C5 C4 C22 C23 129.5(2) . . . . ? 
C27 C22 C23 C24 2.7(3) . . . . ? 
C4 C22 C23 C24 -172.10(19) . . . . ? 
C22 C23 C24 C25 -0.9(3) . . . . ? 
C23 C24 C25 C26 -1.5(4) . . . . ? 
C24 C25 C26 C27 2.1(4) . . . . ? 
C23 C22 C27 C26 -2.1(3) . . . . ? 
C4 C22 C27 C26 172.8(2) . . . . ? 
C25 C26 C27 C22 -0.3(4) . . . . ? 
N4 C6 C28 C29 -49.0(3) . . . . ? 
C5 C6 C28 C29 137.2(2) . . . . ? 
N4 C6 C28 C33 131.1(2) . . . . ? 
C5 C6 C28 C33 -42.7(3) . . . . ? 
C33 C28 C29 C30 -2.0(3) . . . . ? 
C6 C28 C29 C30 178.08(18) . . . . ? 
C28 C29 C30 C31 2.0(3) . . . . ? 
C29 C30 C31 C32 -1.0(3) . . . . ? 
C30 C31 C32 C33 0.1(3) . . . . ? 
C31 C32 C33 C28 -0.2(3) . . . . ? 
C29 C28 C33 C32 1.2(3) . . . . ? 
C6 C28 C33 C32 -178.96(19) . . . . ? 
N5 C7 C34 C35 36.4(3) . . . . ? 
C8 C7 C34 C35 -139.8(2) . . . . ? 
N5 C7 C34 C39 -148.08(19) . . . . ? 
C8 C7 C34 C39 35.7(3) . . . . ? 
C39 C34 C35 C36 0.1(3) . . . . ? 
C7 C34 C35 C36 175.58(18) . . . . ? 
C34 C35 C36 C37 0.6(3) . . . . ? 
C35 C36 C37 C38 -0.8(3) . . . . ? 
C36 C37 C38 C39 0.3(3) . . . . ? 
C37 C38 C39 C34 0.4(3) . . . . ? 
C35 C34 C39 C38 -0.6(3) . . . . ? 
C7 C34 C39 C38 -176.21(18) . . . . ? 
N6 C9 C40 C41 -58.1(3) . . . . ? 
C8 C9 C40 C41 123.6(2) . . . . ? 
N6 C9 C40 C45 121.7(2) . . . . ? 
C8 C9 C40 C45 -56.6(3) . . . . ? 
C45 C40 C41 C42 0.7(3) . . . . ? 
C9 C40 C41 C42 -179.51(18) . . . . ? 
C40 C41 C42 C43 -1.6(3) . . . . ? 
C41 C42 C43 C44 1.4(3) . . . . ? 
C42 C43 C44 C45 -0.4(3) . . . . ? 
C43 C44 C45 C40 -0.5(3) . . . . ? 
C41 C40 C45 C44 0.3(3) . . . . ? 
C9 C40 C45 C44 -179.46(19) . . . . ? 
Fe1 O1 C46 C51 164.52(15) . . . . ? 
Fe1 O1 C46 C47 -13.7(3) . . . . ? 
O1 C46 C47 C48 178.8(2) . . . . ? 
C51 C46 C47 C48 0.4(3) . . . . ? 
O1 C46 C47 Cl1 0.8(3) . . . . ? 
C51 C46 C47 Cl1 -177.53(15) . . . . ? 
Fe1 Cl1 C47 C48 -172.34(18) . . . . ? 
Fe1 Cl1 C47 C46 5.71(16) . . . . ? 
C46 C47 C48 C49 0.2(3) . . . . ? 
Cl1 C47 C48 C49 178.06(17) . . . . ? 
C47 C48 C49 C50 -1.1(3) . . . . ? 
C48 C49 C50 C51 1.3(3) . . . . ? 
C49 C50 C51 C46 -0.7(3) . . . . ? 
C49 C50 C51 Cl2 178.19(17) . . . . ? 
O1 C46 C51 C50 -178.52(19) . . . . ? 
C47 C46 C51 C50 -0.2(3) . . . . ? 
O1 C46 C51 Cl2 2.6(3) . . . . ? 
C47 C46 C51 Cl2 -179.09(15) . . . . ? 
  
_diffrn_measured_fraction_theta_max    0.991 
_diffrn_reflns_theta_full              33.73 
_diffrn_measured_fraction_theta_full   0.991 
_refine_diff_density_max    0.570 
_refine_diff_density_min   -0.457 
_refine_diff_density_rms    0.084 

#===END

data_2 
  
_vrf_PLAT302_2 
; 
PROBLEM: _G Note: Anion/Solvent Disorder ................... 100 Perc. 
RESPONSE: The cocrystallized THF solvent molecule is modeled as 
disordered over a crystallographic inverion center (50:50). 
; 
  
_vrf_PLAT860_2 
; 
PROBLEM: _G Note: Number of Least-Squares Restraints ....... 5 
RESPONSE: Corresponding bond lengths and angles in both directions 
around the THF ring were restrained to be similar. Anisotropic 
displacement parameters for spatially close symmetry-related atoms 
were constrained to be equivalent. 
; 
  
_audit_creation_method            SHELXL-97 
_chemical_name_systematic 
; 
2 
; 
_chemical_name_common             holkg18 
_chemical_melting_point           ? 
_chemical_formula_moiety          'C51 H37 B Br2 Fe N6 O, 0.5(C4 H8 O)' 
_chemical_formula_sum             'C53 H41 B Br2 Fe N6 O1.5' 
_chemical_formula_weight          1012.40 
  
loop_ 
 _atom_type_symbol 
 _atom_type_description 
 _atom_type_scat_dispersion_real 
 _atom_type_scat_dispersion_imag 
 _atom_type_scat_source 
 'C'  'C'   0.0033   0.0016 
 'International Tables Vol C Tables 4.2.6.8 and 6.1.1.4' 
 'H'  'H'   0.0000   0.0000 
 'International Tables Vol C Tables 4.2.6.8 and 6.1.1.4' 
 'B'  'B'   0.0013   0.0007 
 'International Tables Vol C Tables 4.2.6.8 and 6.1.1.4' 
 'N'  'N'   0.0061   0.0033 
 'International Tables Vol C Tables 4.2.6.8 and 6.1.1.4' 
 'O'  'O'   0.0106   0.0060 
 'International Tables Vol C Tables 4.2.6.8 and 6.1.1.4' 
 'Fe'  'Fe'   0.3463   0.8444 
 'International Tables Vol C Tables 4.2.6.8 and 6.1.1.4' 
 'Br'  'Br'  -0.2901   2.4595 
 'International Tables Vol C Tables 4.2.6.8 and 6.1.1.4' 
  
_symmetry_cell_setting            triclinic 
_symmetry_space_group_name_H-M    'P -1' 
  
loop_ 
 _symmetry_equiv_pos_as_xyz 
 'x, y, z' 
 '-x, -y, -z' 
  
_cell_length_a                    12.4836(11) 
_cell_length_b                    12.8222(11) 
_cell_length_c                    15.9833(14) 
_cell_angle_alpha                 89.687(2) 
_cell_angle_beta                  79.109(2) 
_cell_angle_gamma                 62.179(2) 
_cell_volume                      2211.8(3) 
_cell_formula_units_Z             2 
_cell_measurement_temperature     100.0(5) 
_cell_measurement_reflns_used     4023 
_cell_measurement_theta_min       2.32 
_cell_measurement_theta_max       29.72 
  
_exptl_crystal_description        needle 
_exptl_crystal_colour             colorless 
_exptl_crystal_size_max           0.22 
_exptl_crystal_size_mid           0.18 
_exptl_crystal_size_min           0.12 
_exptl_crystal_density_meas       ? 
_exptl_crystal_density_diffrn     1.520 
_exptl_crystal_density_method     'not measured' 
_exptl_crystal_F_000              1028 
_exptl_absorpt_coefficient_mu     2.197 
_exptl_absorpt_correction_type    multi-scan 
_exptl_absorpt_correction_T_min   0.6436 
_exptl_absorpt_correction_T_max   0.7785 
_exptl_absorpt_process_details    'SADABS (Sheldrick, 2008)' 
  
_exptl_special_details 
; 
 ? 
; 
  
_diffrn_ambient_temperature       100.0(5) 
_diffrn_radiation_wavelength      0.71073 
_diffrn_radiation_type            MoK\a 
_diffrn_radiation_source          'fine-focus sealed tube' 
_diffrn_radiation_monochromator   graphite 
_diffrn_measurement_device_type   'Bruker SMART APEX II CCD Platform' 
_diffrn_measurement_method        'area detector, \w scans per \f' 
_diffrn_detector_area_resol_mean  ? 
_diffrn_standards_number          0 
_diffrn_standards_interval_count  ? 
_diffrn_standards_interval_time   ? 
_diffrn_standards_decay_%         ? 
_diffrn_reflns_number             45390 
_diffrn_reflns_av_R_equivalents   0.0755 
_diffrn_reflns_av_sigmaI/netI     0.1020 
_diffrn_reflns_limit_h_min        -19 
_diffrn_reflns_limit_h_max        19 
_diffrn_reflns_limit_k_min        -19 
_diffrn_reflns_limit_k_max        19 
_diffrn_reflns_limit_l_min        -24 
_diffrn_reflns_limit_l_max        24 
_diffrn_reflns_theta_min          1.80 
_diffrn_reflns_theta_max          33.14 
_reflns_number_total              16767 
_reflns_number_gt                 9607 
_reflns_threshold_expression      >2sigma(I) 
  
_computing_data_collection        'APEX2 (Bruker, 2011)' 
_computing_cell_refinement        'SAINT (Bruker, 2009)' 
_computing_data_reduction         'SAINT (Bruker, 2009)' 
_computing_structure_solution     'SIR97 (Altomare et al., 1999)' 
_computing_structure_refinement   'SHELXL-97 (Sheldrick, 2008)' 
_computing_molecular_graphics     'SHELXTL (Sheldrick, 2008)' 
_computing_publication_material   'SHELXTL (Sheldrick, 2008)' 
  
_refine_special_details 
; 
 Refinement of F^2^ against ALL reflections.  The weighted R-factor wR and 
 goodness of fit S are based on F^2^, conventional R-factors R are based 
 on F, with F set to zero for negative F^2^. The threshold expression of 
 F^2^ > 2sigma(F^2^) is used only for calculating R-factors(gt) etc. and is 
 not relevant to the choice of reflections for refinement.  R-factors based 
 on F^2^ are statistically about twice as large as those based on F, and R- 
 factors based on ALL data will be even larger. 
  
 The cocrystallized THF solvent molecule is modeled as disordered over a 
 crystallographic inverion center (50:50). Corresponding bond lengths and 
 angles in both directions around the THF ring were restrained to be 
 similar. Anisotropic displacement parameters for spatially close 
 symmetry-related atoms were constrained to be equivalent. 
; 
  
_refine_ls_structure_factor_coef  Fsqd 
_refine_ls_matrix_type            full 
_refine_ls_weighting_scheme       calc 
_refine_ls_weighting_details 
 'calc w=1/[\s^2^(Fo^2^)+(0.0458P)^2^+0.0000P] where P=(Fo^2^+2Fc^2^)/3' 
_atom_sites_solution_primary      direct 
_atom_sites_solution_secondary    difmap 
_atom_sites_solution_hydrogens    geom 
_refine_ls_hydrogen_treatment     constr 
_refine_ls_extinction_method      none 
_refine_ls_extinction_coef        ? 
_refine_ls_number_reflns          16767 
_refine_ls_number_parameters      592 
_refine_ls_number_restraints      5 
_refine_ls_R_factor_all           0.1159 
_refine_ls_R_factor_gt            0.0535 
_refine_ls_wR_factor_ref          0.1224 
_refine_ls_wR_factor_gt           0.1021 
_refine_ls_goodness_of_fit_ref    0.998 
_refine_ls_restrained_S_all       1.000 
_refine_ls_shift/su_max           0.001 
_refine_ls_shift/su_mean          0.000 
  
loop_ 
 _atom_site_label 
 _atom_site_type_symbol 
 _atom_site_fract_x 
 _atom_site_fract_y 
 _atom_site_fract_z 
 _atom_site_U_iso_or_equiv 
 _atom_site_adp_type 
 _atom_site_occupancy 
 _atom_site_symmetry_multiplicity 
 _atom_site_calc_flag 
 _atom_site_refinement_flags 
 _atom_site_disorder_assembly 
 _atom_site_disorder_group 
Fe1 Fe 0.14644(3) 0.17764(3) 0.74673(2) 0.01567(8) Uani 1 1 d . . . 
Br1 Br 0.08161(3) 0.38104(3) 0.861164(18) 0.02683(8) Uani 1 1 d . . . 
Br2 Br 0.30888(3) -0.08425(3) 0.95873(2) 0.03294(9) Uani 1 1 d . . . 
O1 O 0.18107(18) 0.11306(16) 0.85164(11) 0.0209(4) Uani 1 1 d . . . 
N1 N 0.0026(2) 0.27656(19) 0.68438(13) 0.0163(4) Uani 1 1 d . . . 
N2 N 0.03906(19) 0.26176(18) 0.59659(12) 0.0147(4) Uani 1 1 d . . . 
N3 N 0.17856(19) 0.02726(19) 0.66839(13) 0.0161(4) Uani 1 1 d . . . 
N4 N 0.19196(19) 0.04403(18) 0.58228(13) 0.0150(4) Uani 1 1 d . . . 
N5 N 0.2772(2) 0.20510(19) 0.65893(13) 0.0163(4) Uani 1 1 d . . . 
N6 N 0.26921(19) 0.19510(19) 0.57492(13) 0.0154(4) Uani 1 1 d . . . 
B1 B 0.1717(3) 0.1648(3) 0.55222(18) 0.0161(5) Uani 1 1 d . . . 
H1B H 0.1791 0.1618 0.4888 0.019 Uiso 1 1 calc R . . 
C1 C -0.1148(2) 0.3640(2) 0.70336(16) 0.0165(5) Uani 1 1 d . . . 
C2 C -0.1529(2) 0.4082(2) 0.62833(16) 0.0180(5) Uani 1 1 d . . . 
H2A H -0.2309 0.4716 0.6237 0.022 Uiso 1 1 calc R . . 
C3 C -0.0544(2) 0.3412(2) 0.56205(16) 0.0168(5) Uani 1 1 d . . . 
C4 C 0.1886(2) -0.0813(2) 0.67413(16) 0.0166(5) Uani 1 1 d . . . 
C5 C 0.2093(2) -0.1350(2) 0.59252(16) 0.0184(5) Uani 1 1 d . . . 
H5A H 0.2206 -0.2120 0.5787 0.022 Uiso 1 1 calc R . . 
C6 C 0.2097(2) -0.0534(2) 0.53637(16) 0.0167(5) Uani 1 1 d . . . 
C7 C 0.3722(2) 0.2286(2) 0.65781(16) 0.0170(5) Uani 1 1 d . . . 
C8 C 0.4246(2) 0.2327(2) 0.57394(16) 0.0187(5) Uani 1 1 d . . . 
H8A H 0.4928 0.2475 0.5555 0.022 Uiso 1 1 calc R . . 
C9 C 0.3583(2) 0.2112(2) 0.52267(16) 0.0157(5) Uani 1 1 d . . . 
C10 C -0.1893(2) 0.3959(2) 0.79169(16) 0.0179(5) Uani 1 1 d . . . 
C11 C -0.2845(3) 0.5095(3) 0.81666(19) 0.0298(7) Uani 1 1 d . . . 
H11A H -0.3015 0.5678 0.7770 0.036 Uiso 1 1 calc R . . 
C12 C -0.3558(3) 0.5391(3) 0.8995(2) 0.0385(8) Uani 1 1 d . . . 
H12A H -0.4193 0.6182 0.9167 0.046 Uiso 1 1 calc R . . 
C13 C -0.3350(3) 0.4550(3) 0.95653(19) 0.0325(7) Uani 1 1 d . . . 
H13A H -0.3835 0.4756 1.0132 0.039 Uiso 1 1 calc R . . 
C14 C -0.2439(3) 0.3413(3) 0.93116(18) 0.0285(7) Uani 1 1 d . . . 
H14A H -0.2310 0.2823 0.9700 0.034 Uiso 1 1 calc R . . 
C15 C -0.1702(3) 0.3110(3) 0.84943(17) 0.0235(6) Uani 1 1 d . . . 
H15A H -0.1065 0.2318 0.8329 0.028 Uiso 1 1 calc R . . 
C16 C -0.0488(2) 0.3528(2) 0.46896(16) 0.0165(5) Uani 1 1 d . . . 
C17 C -0.0900(3) 0.4657(2) 0.44123(17) 0.0212(5) Uani 1 1 d . . . 
H17A H -0.1189 0.5321 0.4816 0.025 Uiso 1 1 calc R . . 
C18 C -0.0893(3) 0.4823(3) 0.35547(17) 0.0237(6) Uani 1 1 d . . . 
H18A H -0.1174 0.5596 0.3373 0.028 Uiso 1 1 calc R . . 
C19 C -0.0481(3) 0.3866(2) 0.29667(17) 0.0233(6) Uani 1 1 d . . . 
H19A H -0.0466 0.3979 0.2378 0.028 Uiso 1 1 calc R . . 
C20 C -0.0085(3) 0.2734(2) 0.32324(16) 0.0208(5) Uani 1 1 d . . . 
H20A H 0.0189 0.2075 0.2827 0.025 Uiso 1 1 calc R . . 
C21 C -0.0093(2) 0.2571(2) 0.40913(16) 0.0178(5) Uani 1 1 d . . . 
H21A H 0.0175 0.1798 0.4273 0.021 Uiso 1 1 calc R . . 
C22 C 0.1663(3) -0.1292(2) 0.75561(16) 0.0193(5) Uani 1 1 d . . . 
C23 C 0.2322(3) -0.2502(3) 0.76296(19) 0.0279(6) Uani 1 1 d . . . 
H23A H 0.3000 -0.2997 0.7184 0.033 Uiso 1 1 calc R . . 
C24 C 0.1999(3) -0.2992(3) 0.8344(2) 0.0337(7) Uani 1 1 d . . . 
H24A H 0.2459 -0.3818 0.8389 0.040 Uiso 1 1 calc R . . 
C25 C 0.1014(3) -0.2283(3) 0.8988(2) 0.0344(8) Uani 1 1 d . . . 
H25A H 0.0771 -0.2626 0.9466 0.041 Uiso 1 1 calc R . . 
C26 C 0.0378(3) -0.1081(3) 0.89468(18) 0.0301(7) Uani 1 1 d . . . 
H26A H -0.0280 -0.0591 0.9405 0.036 Uiso 1 1 calc R . . 
C27 C 0.0702(3) -0.0588(3) 0.82341(17) 0.0234(6) Uani 1 1 d . . . 
H27A H 0.0262 0.0244 0.8207 0.028 Uiso 1 1 calc R . . 
C28 C 0.2156(2) -0.0602(2) 0.44312(16) 0.0175(5) Uani 1 1 d . . . 
C29 C 0.1388(3) -0.0957(2) 0.41325(17) 0.0212(6) Uani 1 1 d . . . 
H29A H 0.0879 -0.1186 0.4523 0.025 Uiso 1 1 calc R . . 
C30 C 0.1357(3) -0.0980(3) 0.32709(17) 0.0228(6) Uani 1 1 d . . . 
H30A H 0.0830 -0.1224 0.3075 0.027 Uiso 1 1 calc R . . 
C31 C 0.2091(3) -0.0648(2) 0.26969(17) 0.0234(6) Uani 1 1 d . . . 
H31A H 0.2062 -0.0654 0.2107 0.028 Uiso 1 1 calc R . . 
C32 C 0.2866(3) -0.0309(2) 0.29833(17) 0.0217(6) Uani 1 1 d . . . 
H32A H 0.3375 -0.0085 0.2588 0.026 Uiso 1 1 calc R . . 
C33 C 0.2912(2) -0.0291(2) 0.38435(16) 0.0185(5) Uani 1 1 d . . . 
H33A H 0.3459 -0.0067 0.4032 0.022 Uiso 1 1 calc R . . 
C34 C 0.4116(2) 0.2466(2) 0.73549(16) 0.0193(5) Uani 1 1 d . . . 
C35 C 0.4532(3) 0.3299(3) 0.73859(18) 0.0273(6) Uani 1 1 d . . . 
H35A H 0.4511 0.3774 0.6924 0.033 Uiso 1 1 calc R . . 
C36 C 0.4975(3) 0.3440(3) 0.80849(19) 0.0300(7) Uani 1 1 d . . . 
H36A H 0.5261 0.4007 0.8099 0.036 Uiso 1 1 calc R . . 
C37 C 0.5004(3) 0.2759(3) 0.87627(17) 0.0275(6) Uani 1 1 d . . . 
H37A H 0.5312 0.2855 0.9240 0.033 Uiso 1 1 calc R . . 
C38 C 0.4581(3) 0.1935(3) 0.87427(17) 0.0237(6) Uani 1 1 d . . . 
H38A H 0.4590 0.1474 0.9211 0.028 Uiso 1 1 calc R . . 
C39 C 0.4144(2) 0.1783(2) 0.80389(16) 0.0190(5) Uani 1 1 d . . . 
H39A H 0.3864 0.1211 0.8025 0.023 Uiso 1 1 calc R . . 
C40 C 0.3792(2) 0.2022(2) 0.42824(16) 0.0164(5) Uani 1 1 d . . . 
C41 C 0.2830(2) 0.2596(2) 0.38489(16) 0.0184(5) Uani 1 1 d . . . 
H41A H 0.2011 0.3085 0.4163 0.022 Uiso 1 1 calc R . . 
C42 C 0.3064(3) 0.2455(2) 0.29649(17) 0.0219(6) Uani 1 1 d . . . 
H42A H 0.2397 0.2826 0.2678 0.026 Uiso 1 1 calc R . . 
C43 C 0.4257(3) 0.1782(3) 0.24929(17) 0.0226(6) Uani 1 1 d . . . 
H43A H 0.4410 0.1693 0.1886 0.027 Uiso 1 1 calc R . . 
C44 C 0.5227(3) 0.1236(2) 0.29157(17) 0.0223(6) Uani 1 1 d . . . 
H44A H 0.6052 0.0789 0.2598 0.027 Uiso 1 1 calc R . . 
C45 C 0.4988(2) 0.1345(2) 0.38057(16) 0.0194(5) Uani 1 1 d . . . 
H45A H 0.5652 0.0951 0.4092 0.023 Uiso 1 1 calc R . . 
C46 C 0.1906(2) 0.1557(3) 0.92300(16) 0.0202(5) Uani 1 1 d . . . 
C47 C 0.1502(3) 0.2759(3) 0.94326(17) 0.0233(6) Uani 1 1 d . . . 
C48 C 0.1628(3) 0.3199(3) 1.01752(19) 0.0327(7) Uani 1 1 d . . . 
H48A H 0.1343 0.4023 1.0285 0.039 Uiso 1 1 calc R . . 
C49 C 0.2174(3) 0.2422(3) 1.07557(19) 0.0403(9) Uani 1 1 d . . . 
H49A H 0.2263 0.2713 1.1270 0.048 Uiso 1 1 calc R . . 
C50 C 0.2590(3) 0.1227(3) 1.05886(18) 0.0325(7) Uani 1 1 d . . . 
H50A H 0.2958 0.0693 1.0989 0.039 Uiso 1 1 calc R . . 
C51 C 0.2467(3) 0.0809(3) 0.98342(17) 0.0257(6) Uani 1 1 d . . . 
O2 O 0.4083(5) 0.5429(5) 0.5865(3) 0.0562(14) Uani 0.50 1 d PD A -1 
C52 C 0.5266(7) 0.5424(8) 0.5780(5) 0.050(2) Uani 0.50 1 d PD A -1 
H52A H 0.5672 0.5022 0.6249 0.061 Uiso 0.50 1 calc PR A -1 
H52B H 0.5134 0.6247 0.5816 0.061 Uiso 0.50 1 calc PR A -1 
C53 C 0.6091(9) 0.4768(9) 0.4912(6) 0.0496(14) Uani 0.50 1 d PD A -1 
H53A H 0.6834 0.4038 0.4986 0.059 Uiso 0.50 1 calc PR A -1 
H53B H 0.6355 0.5280 0.4562 0.059 Uiso 0.50 1 calc PR A -1 
C54 C 0.5212(7) 0.4475(8) 0.4502(5) 0.0496(14) Uani 0.50 1 d PD A -1 
H54A H 0.5413 0.4431 0.3869 0.059 Uiso 0.50 1 calc PR A -1 
H54B H 0.5230 0.3728 0.4681 0.059 Uiso 0.50 1 calc PR A -1 
C55 C 0.3987(9) 0.5545(8) 0.4880(6) 0.0496(14) Uani 0.50 1 d PD A -1 
H55A H 0.3274 0.5471 0.4763 0.059 Uiso 0.50 1 calc PR A -1 
H55B H 0.3951 0.6292 0.4683 0.059 Uiso 0.50 1 calc PR A -1 
  
loop_ 
 _atom_site_aniso_label 
 _atom_site_aniso_U_11 
 _atom_site_aniso_U_22 
 _atom_site_aniso_U_33 
 _atom_site_aniso_U_23 
 _atom_site_aniso_U_13 
 _atom_site_aniso_U_12 
Fe1 0.01811(19) 0.01889(19) 0.01028(17) 0.00258(14) -0.00467(14) -0.00838(16) 
Br1 0.02988(16) 0.02275(15) 0.02408(15) -0.00101(11) -0.00761(12) -0.00865(12) 
Br2 0.03486(18) 0.03650(18) 0.03139(17) 0.01829(14) -0.01397(14) -0.01773(15) 
O1 0.0293(11) 0.0242(10) 0.0140(9) 0.0047(8) -0.0079(8) -0.0154(9) 
N1 0.0187(11) 0.0209(11) 0.0097(9) 0.0015(8) -0.0031(8) -0.0097(9) 
N2 0.0161(10) 0.0179(10) 0.0094(9) 0.0014(8) -0.0042(8) -0.0070(9) 
N3 0.0166(11) 0.0195(11) 0.0121(10) 0.0027(8) -0.0030(8) -0.0084(9) 
N4 0.0159(10) 0.0184(10) 0.0100(10) 0.0003(8) -0.0024(8) -0.0078(9) 
N5 0.0194(11) 0.0196(11) 0.0117(10) 0.0009(8) -0.0058(8) -0.0098(9) 
N6 0.0174(11) 0.0189(11) 0.0113(10) 0.0030(8) -0.0045(8) -0.0092(9) 
B1 0.0175(14) 0.0184(14) 0.0121(13) 0.0011(11) -0.0041(11) -0.0081(12) 
C1 0.0190(13) 0.0174(12) 0.0137(12) 0.0009(10) -0.0030(10) -0.0092(11) 
C2 0.0180(13) 0.0179(12) 0.0164(12) 0.0020(10) -0.0044(10) -0.0068(11) 
C3 0.0201(13) 0.0198(13) 0.0127(12) 0.0036(10) -0.0058(10) -0.0105(11) 
C4 0.0176(12) 0.0208(13) 0.0130(12) 0.0040(10) -0.0050(10) -0.0097(11) 
C5 0.0208(13) 0.0173(12) 0.0179(13) 0.0009(10) -0.0034(10) -0.0100(11) 
C6 0.0161(12) 0.0195(12) 0.0146(12) -0.0007(10) -0.0051(10) -0.0079(11) 
C7 0.0197(13) 0.0188(12) 0.0145(12) 0.0022(10) -0.0074(10) -0.0093(11) 
C8 0.0197(13) 0.0239(13) 0.0168(12) 0.0031(10) -0.0040(10) -0.0138(11) 
C9 0.0160(12) 0.0165(12) 0.0142(12) 0.0039(10) -0.0031(9) -0.0073(10) 
C10 0.0187(13) 0.0210(13) 0.0147(12) -0.0001(10) -0.0025(10) -0.0104(11) 
C11 0.0306(17) 0.0261(15) 0.0249(15) 0.0043(12) 0.0032(13) -0.0106(13) 
C12 0.0398(19) 0.0267(16) 0.0312(18) -0.0067(14) 0.0144(15) -0.0092(15) 
C13 0.0346(18) 0.0442(19) 0.0167(14) -0.0021(13) 0.0046(12) -0.0206(16) 
C14 0.0334(17) 0.0408(18) 0.0176(14) 0.0088(13) -0.0069(12) -0.0222(15) 
C15 0.0250(15) 0.0264(15) 0.0154(13) 0.0006(11) -0.0033(11) -0.0095(12) 
C16 0.0149(12) 0.0222(13) 0.0136(12) 0.0028(10) -0.0045(9) -0.0091(11) 
C17 0.0229(14) 0.0191(13) 0.0191(13) 0.0021(10) -0.0072(11) -0.0069(11) 
C18 0.0293(15) 0.0230(14) 0.0215(14) 0.0103(11) -0.0117(12) -0.0122(12) 
C19 0.0313(16) 0.0283(15) 0.0132(12) 0.0068(11) -0.0095(11) -0.0148(13) 
C20 0.0261(14) 0.0239(14) 0.0147(12) 0.0010(10) -0.0078(11) -0.0125(12) 
C21 0.0189(13) 0.0181(12) 0.0180(12) 0.0047(10) -0.0066(10) -0.0092(11) 
C22 0.0238(14) 0.0246(14) 0.0146(12) 0.0047(10) -0.0060(10) -0.0150(12) 
C23 0.0326(17) 0.0272(15) 0.0254(15) 0.0067(12) -0.0111(13) -0.0135(14) 
C24 0.044(2) 0.0346(17) 0.0328(18) 0.0184(14) -0.0210(15) -0.0229(16) 
C25 0.044(2) 0.052(2) 0.0260(16) 0.0211(15) -0.0165(14) -0.0351(18) 
C26 0.0310(17) 0.050(2) 0.0180(14) 0.0073(13) -0.0054(12) -0.0258(16) 
C27 0.0257(15) 0.0302(15) 0.0190(13) 0.0055(11) -0.0054(11) -0.0168(13) 
C28 0.0176(13) 0.0161(12) 0.0156(12) -0.0006(10) -0.0026(10) -0.0057(10) 
C29 0.0272(15) 0.0230(14) 0.0175(13) 0.0028(11) -0.0022(11) -0.0163(12) 
C30 0.0264(15) 0.0293(15) 0.0180(13) 0.0016(11) -0.0086(11) -0.0161(13) 
C31 0.0290(15) 0.0282(15) 0.0145(13) 0.0017(11) -0.0057(11) -0.0143(13) 
C32 0.0209(14) 0.0227(14) 0.0176(13) -0.0015(11) 0.0026(10) -0.0096(12) 
C33 0.0189(13) 0.0198(13) 0.0175(13) 0.0003(10) -0.0020(10) -0.0103(11) 
C34 0.0193(13) 0.0235(14) 0.0155(12) 0.0002(10) -0.0048(10) -0.0100(11) 
C35 0.0381(18) 0.0291(16) 0.0231(15) 0.0068(12) -0.0135(13) -0.0203(14) 
C36 0.0388(18) 0.0349(17) 0.0249(15) -0.0005(13) -0.0118(13) -0.0225(15) 
C37 0.0249(15) 0.0410(18) 0.0157(13) -0.0059(12) -0.0063(11) -0.0140(14) 
C38 0.0220(14) 0.0332(16) 0.0140(13) 0.0026(11) -0.0045(11) -0.0113(13) 
C39 0.0149(12) 0.0248(14) 0.0165(12) 0.0003(10) -0.0042(10) -0.0084(11) 
C40 0.0195(13) 0.0189(12) 0.0146(12) 0.0024(10) -0.0047(10) -0.0118(11) 
C41 0.0175(13) 0.0206(13) 0.0177(13) 0.0033(10) -0.0023(10) -0.0100(11) 
C42 0.0246(14) 0.0280(15) 0.0171(13) 0.0070(11) -0.0078(11) -0.0145(12) 
C43 0.0288(15) 0.0304(15) 0.0121(12) 0.0033(11) -0.0025(11) -0.0174(13) 
C44 0.0221(14) 0.0267(14) 0.0174(13) 0.0011(11) -0.0013(11) -0.0119(12) 
C45 0.0196(13) 0.0228(13) 0.0191(13) 0.0038(11) -0.0059(10) -0.0120(11) 
C46 0.0205(13) 0.0321(15) 0.0120(12) 0.0026(11) -0.0032(10) -0.0158(12) 
C47 0.0227(14) 0.0321(16) 0.0142(13) 0.0020(11) -0.0039(11) -0.0122(13) 
C48 0.0319(17) 0.0424(19) 0.0212(15) -0.0070(13) -0.0025(13) -0.0167(15) 
C49 0.039(2) 0.065(3) 0.0153(15) -0.0074(15) -0.0059(13) -0.0236(19) 
C50 0.0341(17) 0.054(2) 0.0138(13) 0.0097(14) -0.0098(12) -0.0231(17) 
C51 0.0259(15) 0.0389(17) 0.0160(13) 0.0083(12) -0.0063(11) -0.0177(14) 
O2 0.058(4) 0.064(4) 0.053(4) 0.007(3) -0.015(3) -0.032(3) 
C52 0.039(5) 0.069(6) 0.056(5) 0.010(4) -0.009(4) -0.037(5) 
C53 0.037(2) 0.064(4) 0.056(4) 0.003(3) -0.002(2) -0.033(3) 
C54 0.037(2) 0.064(4) 0.056(4) 0.003(3) -0.002(2) -0.033(3) 
C55 0.037(2) 0.064(4) 0.056(4) 0.003(3) -0.002(2) -0.033(3) 
  
_geom_special_details 
; 
 All esds (except the esd in the dihedral angle between two l.s. planes) 
 are estimated using the full covariance matrix.  The cell esds are taken 
 into account individually in the estimation of esds in distances, angles 
 and torsion angles; correlations between esds in cell parameters are only 
 used when they are defined by crystal symmetry.  An approximate (isotropic) 
 treatment of cell esds is used for estimating esds involving l.s. planes. 
; 
  
loop_ 
 _geom_bond_atom_site_label_1 
 _geom_bond_atom_site_label_2 
 _geom_bond_distance 
 _geom_bond_site_symmetry_2 
 _geom_bond_publ_flag 
Fe1 O1 1.8997(17) . ? 
Fe1 N1 2.089(2) . ? 
Fe1 N5 2.103(2) . ? 
Fe1 N3 2.136(2) . ? 
Fe1 Br1 2.8853(5) . ? 
Br1 C47 1.897(3) . ? 
Br2 C51 1.898(3) . ? 
O1 C46 1.317(3) . ? 
N1 C1 1.341(3) . ? 
N1 N2 1.376(3) . ? 
N2 C3 1.353(3) . ? 
N2 B1 1.561(4) . ? 
N3 C4 1.342(3) . ? 
N3 N4 1.383(3) . ? 
N4 C6 1.356(3) . ? 
N4 B1 1.538(3) . ? 
N5 C7 1.350(3) . ? 
N5 N6 1.376(3) . ? 
N6 C9 1.356(3) . ? 
N6 B1 1.540(3) . ? 
B1 H1B 1.0000 . ? 
C1 C2 1.394(3) . ? 
C1 C10 1.477(3) . ? 
C2 C3 1.380(4) . ? 
C2 H2A 0.9500 . ? 
C3 C16 1.486(3) . ? 
C4 C5 1.400(3) . ? 
C4 C22 1.472(3) . ? 
C5 C6 1.376(3) . ? 
C5 H5A 0.9500 . ? 
C6 C28 1.480(3) . ? 
C7 C8 1.389(3) . ? 
C7 C34 1.476(3) . ? 
C8 C9 1.380(3) . ? 
C8 H8A 0.9500 . ? 
C9 C40 1.478(3) . ? 
C10 C11 1.380(4) . ? 
C10 C15 1.387(4) . ? 
C11 C12 1.391(4) . ? 
C11 H11A 0.9500 . ? 
C12 C13 1.370(4) . ? 
C12 H12A 0.9500 . ? 
C13 C14 1.367(4) . ? 
C13 H13A 0.9500 . ? 
C14 C15 1.386(4) . ? 
C14 H14A 0.9500 . ? 
C15 H15A 0.9500 . ? 
C16 C21 1.390(4) . ? 
C16 C17 1.394(4) . ? 
C17 C18 1.385(4) . ? 
C17 H17A 0.9500 . ? 
C18 C19 1.376(4) . ? 
C18 H18A 0.9500 . ? 
C19 C20 1.391(4) . ? 
C19 H19A 0.9500 . ? 
C20 C21 1.386(3) . ? 
C20 H20A 0.9500 . ? 
C21 H21A 0.9500 . ? 
C22 C27 1.392(4) . ? 
C22 C23 1.393(4) . ? 
C23 C24 1.384(4) . ? 
C23 H23A 0.9500 . ? 
C24 C25 1.374(5) . ? 
C24 H24A 0.9500 . ? 
C25 C26 1.373(5) . ? 
C25 H25A 0.9500 . ? 
C26 C27 1.385(4) . ? 
C26 H26A 0.9500 . ? 
C27 H27A 0.9500 . ? 
C28 C29 1.391(4) . ? 
C28 C33 1.394(3) . ? 
C29 C30 1.386(4) . ? 
C29 H29A 0.9500 . ? 
C30 C31 1.380(4) . ? 
C30 H30A 0.9500 . ? 
C31 C32 1.377(4) . ? 
C31 H31A 0.9500 . ? 
C32 C33 1.388(4) . ? 
C32 H32A 0.9500 . ? 
C33 H33A 0.9500 . ? 
C34 C35 1.392(4) . ? 
C34 C39 1.393(4) . ? 
C35 C36 1.384(4) . ? 
C35 H35A 0.9500 . ? 
C36 C37 1.383(4) . ? 
C36 H36A 0.9500 . ? 
C37 C38 1.386(4) . ? 
C37 H37A 0.9500 . ? 
C38 C39 1.391(4) . ? 
C38 H38A 0.9500 . ? 
C39 H39A 0.9500 . ? 
C40 C45 1.389(4) . ? 
C40 C41 1.395(4) . ? 
C41 C42 1.383(4) . ? 
C41 H41A 0.9500 . ? 
C42 C43 1.384(4) . ? 
C42 H42A 0.9500 . ? 
C43 C44 1.388(4) . ? 
C43 H43A 0.9500 . ? 
C44 C45 1.391(4) . ? 
C44 H44A 0.9500 . ? 
C45 H45A 0.9500 . ? 
C46 C47 1.396(4) . ? 
C46 C51 1.401(4) . ? 
C47 C48 1.383(4) . ? 
C48 C49 1.383(5) . ? 
C48 H48A 0.9500 . ? 
C49 C50 1.378(5) . ? 
C49 H49A 0.9500 . ? 
C50 C51 1.385(4) . ? 
C50 H50A 0.9500 . ? 
O2 C52 1.454(8) . ? 
O2 C55 1.602(10) . ? 
C52 C53 1.535(10) . ? 
C52 H52A 0.9900 . ? 
C52 H52B 0.9900 . ? 
C53 C54 1.561(8) . ? 
C53 H53A 0.9900 . ? 
C53 H53B 0.9900 . ? 
C54 C55 1.513(11) . ? 
C54 H54A 0.9900 . ? 
C54 H54B 0.9900 . ? 
C55 H55A 0.9900 . ? 
C55 H55B 0.9900 . ? 
  
loop_ 
 _geom_angle_atom_site_label_1 
 _geom_angle_atom_site_label_2 
 _geom_angle_atom_site_label_3 
 _geom_angle 
 _geom_angle_site_symmetry_1 
 _geom_angle_site_symmetry_3 
 _geom_angle_publ_flag 
O1 Fe1 N1 143.31(8) . . ? 
O1 Fe1 N5 121.48(8) . . ? 
N1 Fe1 N5 93.37(8) . . ? 
O1 Fe1 N3 102.25(8) . . ? 
N1 Fe1 N3 86.32(8) . . ? 
N5 Fe1 N3 91.93(8) . . ? 
O1 Fe1 Br1 76.22(6) . . ? 
N1 Fe1 Br1 91.86(6) . . ? 
N5 Fe1 Br1 93.34(6) . . ? 
N3 Fe1 Br1 174.53(6) . . ? 
C47 Br1 Fe1 88.35(9) . . ? 
C46 O1 Fe1 133.01(17) . . ? 
C1 N1 N2 106.7(2) . . ? 
C1 N1 Fe1 138.96(17) . . ? 
N2 N1 Fe1 113.60(15) . . ? 
C3 N2 N1 109.6(2) . . ? 
C3 N2 B1 130.1(2) . . ? 
N1 N2 B1 120.33(19) . . ? 
C4 N3 N4 106.27(19) . . ? 
C4 N3 Fe1 141.13(17) . . ? 
N4 N3 Fe1 112.59(15) . . ? 
C6 N4 N3 109.66(19) . . ? 
C6 N4 B1 129.2(2) . . ? 
N3 N4 B1 120.7(2) . . ? 
C7 N5 N6 106.28(19) . . ? 
C7 N5 Fe1 139.82(17) . . ? 
N6 N5 Fe1 113.89(15) . . ? 
C9 N6 N5 110.1(2) . . ? 
C9 N6 B1 129.6(2) . . ? 
N5 N6 B1 120.27(19) . . ? 
N4 B1 N6 110.5(2) . . ? 
N4 B1 N2 108.9(2) . . ? 
N6 B1 N2 109.9(2) . . ? 
N4 B1 H1B 109.2 . . ? 
N6 B1 H1B 109.2 . . ? 
N2 B1 H1B 109.2 . . ? 
N1 C1 C2 109.7(2) . . ? 
N1 C1 C10 122.0(2) . . ? 
C2 C1 C10 128.1(2) . . ? 
C3 C2 C1 106.1(2) . . ? 
C3 C2 H2A 126.9 . . ? 
C1 C2 H2A 126.9 . . ? 
N2 C3 C2 107.8(2) . . ? 
N2 C3 C16 125.1(2) . . ? 
C2 C3 C16 127.1(2) . . ? 
N3 C4 C5 110.2(2) . . ? 
N3 C4 C22 123.9(2) . . ? 
C5 C4 C22 125.6(2) . . ? 
C6 C5 C4 105.8(2) . . ? 
C6 C5 H5A 127.1 . . ? 
C4 C5 H5A 127.1 . . ? 
N4 C6 C5 108.1(2) . . ? 
N4 C6 C28 123.4(2) . . ? 
C5 C6 C28 128.2(2) . . ? 
N5 C7 C8 109.7(2) . . ? 
N5 C7 C34 123.8(2) . . ? 
C8 C7 C34 126.5(2) . . ? 
C9 C8 C7 106.6(2) . . ? 
C9 C8 H8A 126.7 . . ? 
C7 C8 H8A 126.7 . . ? 
N6 C9 C8 107.3(2) . . ? 
N6 C9 C40 124.4(2) . . ? 
C8 C9 C40 128.2(2) . . ? 
C11 C10 C15 118.7(2) . . ? 
C11 C10 C1 120.4(2) . . ? 
C15 C10 C1 120.8(2) . . ? 
C10 C11 C12 120.4(3) . . ? 
C10 C11 H11A 119.8 . . ? 
C12 C11 H11A 119.8 . . ? 
C13 C12 C11 120.5(3) . . ? 
C13 C12 H12A 119.8 . . ? 
C11 C12 H12A 119.8 . . ? 
C14 C13 C12 119.4(3) . . ? 
C14 C13 H13A 120.3 . . ? 
C12 C13 H13A 120.3 . . ? 
C13 C14 C15 120.8(3) . . ? 
C13 C14 H14A 119.6 . . ? 
C15 C14 H14A 119.6 . . ? 
C14 C15 C10 120.1(3) . . ? 
C14 C15 H15A 119.9 . . ? 
C10 C15 H15A 119.9 . . ? 
C21 C16 C17 118.7(2) . . ? 
C21 C16 C3 123.1(2) . . ? 
C17 C16 C3 118.1(2) . . ? 
C18 C17 C16 120.7(3) . . ? 
C18 C17 H17A 119.6 . . ? 
C16 C17 H17A 119.6 . . ? 
C19 C18 C17 120.0(3) . . ? 
C19 C18 H18A 120.0 . . ? 
C17 C18 H18A 120.0 . . ? 
C18 C19 C20 120.2(2) . . ? 
C18 C19 H19A 119.9 . . ? 
C20 C19 H19A 119.9 . . ? 
C21 C20 C19 119.7(2) . . ? 
C21 C20 H20A 120.1 . . ? 
C19 C20 H20A 120.1 . . ? 
C20 C21 C16 120.6(2) . . ? 
C20 C21 H21A 119.7 . . ? 
C16 C21 H21A 119.7 . . ? 
C27 C22 C23 118.1(2) . . ? 
C27 C22 C4 121.4(2) . . ? 
C23 C22 C4 120.1(2) . . ? 
C24 C23 C22 120.8(3) . . ? 
C24 C23 H23A 119.6 . . ? 
C22 C23 H23A 119.6 . . ? 
C25 C24 C23 119.9(3) . . ? 
C25 C24 H24A 120.1 . . ? 
C23 C24 H24A 120.1 . . ? 
C26 C25 C24 120.5(3) . . ? 
C26 C25 H25A 119.7 . . ? 
C24 C25 H25A 119.7 . . ? 
C25 C26 C27 119.7(3) . . ? 
C25 C26 H26A 120.2 . . ? 
C27 C26 H26A 120.2 . . ? 
C26 C27 C22 121.0(3) . . ? 
C26 C27 H27A 119.5 . . ? 
C22 C27 H27A 119.5 . . ? 
C29 C28 C33 118.6(2) . . ? 
C29 C28 C6 118.2(2) . . ? 
C33 C28 C6 123.1(2) . . ? 
C30 C29 C28 120.7(2) . . ? 
C30 C29 H29A 119.6 . . ? 
C28 C29 H29A 119.6 . . ? 
C31 C30 C29 120.2(2) . . ? 
C31 C30 H30A 119.9 . . ? 
C29 C30 H30A 119.9 . . ? 
C32 C31 C30 119.6(2) . . ? 
C32 C31 H31A 120.2 . . ? 
C30 C31 H31A 120.2 . . ? 
C31 C32 C33 120.7(2) . . ? 
C31 C32 H32A 119.6 . . ? 
C33 C32 H32A 119.6 . . ? 
C32 C33 C28 120.1(2) . . ? 
C32 C33 H33A 120.0 . . ? 
C28 C33 H33A 120.0 . . ? 
C35 C34 C39 119.2(2) . . ? 
C35 C34 C7 119.1(2) . . ? 
C39 C34 C7 121.7(2) . . ? 
C36 C35 C34 120.4(3) . . ? 
C36 C35 H35A 119.8 . . ? 
C34 C35 H35A 119.8 . . ? 
C37 C36 C35 120.3(3) . . ? 
C37 C36 H36A 119.8 . . ? 
C35 C36 H36A 119.8 . . ? 
C36 C37 C38 119.8(3) . . ? 
C36 C37 H37A 120.1 . . ? 
C38 C37 H37A 120.1 . . ? 
C37 C38 C39 120.2(3) . . ? 
C37 C38 H38A 119.9 . . ? 
C39 C38 H38A 119.9 . . ? 
C38 C39 C34 120.1(3) . . ? 
C38 C39 H39A 119.9 . . ? 
C34 C39 H39A 119.9 . . ? 
C45 C40 C41 118.5(2) . . ? 
C45 C40 C9 119.1(2) . . ? 
C41 C40 C9 122.4(2) . . ? 
C42 C41 C40 120.3(2) . . ? 
C42 C41 H41A 119.8 . . ? 
C40 C41 H41A 119.8 . . ? 
C41 C42 C43 120.9(3) . . ? 
C41 C42 H42A 119.6 . . ? 
C43 C42 H42A 119.6 . . ? 
C42 C43 C44 119.3(2) . . ? 
C42 C43 H43A 120.3 . . ? 
C44 C43 H43A 120.3 . . ? 
C43 C44 C45 119.9(3) . . ? 
C43 C44 H44A 120.1 . . ? 
C45 C44 H44A 120.1 . . ? 
C40 C45 C44 121.0(2) . . ? 
C40 C45 H45A 119.5 . . ? 
C44 C45 H45A 119.5 . . ? 
O1 C46 C47 123.6(2) . . ? 
O1 C46 C51 121.2(3) . . ? 
C47 C46 C51 115.2(2) . . ? 
C48 C47 C46 123.3(3) . . ? 
C48 C47 Br1 119.3(2) . . ? 
C46 C47 Br1 117.30(19) . . ? 
C49 C48 C47 119.1(3) . . ? 
C49 C48 H48A 120.4 . . ? 
C47 C48 H48A 120.4 . . ? 
C50 C49 C48 120.0(3) . . ? 
C50 C49 H49A 120.0 . . ? 
C48 C49 H49A 120.0 . . ? 
C49 C50 C51 119.7(3) . . ? 
C49 C50 H50A 120.2 . . ? 
C51 C50 H50A 120.2 . . ? 
C50 C51 C46 122.7(3) . . ? 
C50 C51 Br2 119.6(2) . . ? 
C46 C51 Br2 117.7(2) . . ? 
C52 O2 C55 97.3(6) . . ? 
O2 C52 C53 108.8(6) . . ? 
O2 C52 H52A 109.9 . . ? 
C53 C52 H52A 109.9 . . ? 
O2 C52 H52B 109.9 . . ? 
C53 C52 H52B 109.9 . . ? 
H52A C52 H52B 108.3 . . ? 
C52 C53 C54 102.3(6) . . ? 
C52 C53 H53A 111.3 . . ? 
C54 C53 H53A 111.3 . . ? 
C52 C53 H53B 111.3 . . ? 
C54 C53 H53B 111.3 . . ? 
H53A C53 H53B 109.2 . . ? 
C55 C54 C53 99.5(6) . . ? 
C55 C54 H54A 111.9 . . ? 
C53 C54 H54A 111.9 . . ? 
C55 C54 H54B 111.9 . . ? 
C53 C54 H54B 111.9 . . ? 
H54A C54 H54B 109.6 . . ? 
C54 C55 O2 97.6(7) . . ? 
C54 C55 H55A 112.3 . . ? 
O2 C55 H55A 112.3 . . ? 
C54 C55 H55B 112.3 . . ? 
O2 C55 H55B 112.3 . . ? 
H55A C55 H55B 109.9 . . ? 
  
loop_ 
 _geom_torsion_atom_site_label_1 
 _geom_torsion_atom_site_label_2 
 _geom_torsion_atom_site_label_3 
 _geom_torsion_atom_site_label_4 
 _geom_torsion 
 _geom_torsion_site_symmetry_1 
 _geom_torsion_site_symmetry_2 
 _geom_torsion_site_symmetry_3 
 _geom_torsion_site_symmetry_4 
 _geom_torsion_publ_flag 
O1 Fe1 Br1 C47 7.59(10) . . . . ? 
N1 Fe1 Br1 C47 152.49(10) . . . . ? 
N5 Fe1 Br1 C47 -114.03(10) . . . . ? 
N3 Fe1 Br1 C47 82.0(6) . . . . ? 
N1 Fe1 O1 C46 -87.4(3) . . . . ? 
N5 Fe1 O1 C46 72.2(3) . . . . ? 
N3 Fe1 O1 C46 172.2(2) . . . . ? 
Br1 Fe1 O1 C46 -13.2(2) . . . . ? 
O1 Fe1 N1 C1 31.8(3) . . . . ? 
N5 Fe1 N1 C1 -130.9(3) . . . . ? 
N3 Fe1 N1 C1 137.4(3) . . . . ? 
Br1 Fe1 N1 C1 -37.4(3) . . . . ? 
O1 Fe1 N1 N2 -159.44(14) . . . . ? 
N5 Fe1 N1 N2 37.91(16) . . . . ? 
N3 Fe1 N1 N2 -53.80(16) . . . . ? 
Br1 Fe1 N1 N2 131.36(15) . . . . ? 
C1 N1 N2 C3 1.2(3) . . . . ? 
Fe1 N1 N2 C3 -171.11(16) . . . . ? 
C1 N1 N2 B1 -179.2(2) . . . . ? 
Fe1 N1 N2 B1 8.4(3) . . . . ? 
O1 Fe1 N3 C4 18.1(3) . . . . ? 
N1 Fe1 N3 C4 -125.8(3) . . . . ? 
N5 Fe1 N3 C4 140.9(3) . . . . ? 
Br1 Fe1 N3 C4 -55.1(8) . . . . ? 
O1 Fe1 N3 N4 -163.48(15) . . . . ? 
N1 Fe1 N3 N4 52.59(16) . . . . ? 
N5 Fe1 N3 N4 -40.66(16) . . . . ? 
Br1 Fe1 N3 N4 123.3(6) . . . . ? 
C4 N3 N4 C6 0.1(3) . . . . ? 
Fe1 N3 N4 C6 -178.88(16) . . . . ? 
C4 N3 N4 B1 173.4(2) . . . . ? 
Fe1 N3 N4 B1 -5.5(3) . . . . ? 
O1 Fe1 N5 C7 -28.9(3) . . . . ? 
N1 Fe1 N5 C7 139.0(3) . . . . ? 
N3 Fe1 N5 C7 -134.5(3) . . . . ? 
Br1 Fe1 N5 C7 47.0(3) . . . . ? 
O1 Fe1 N5 N6 149.66(15) . . . . ? 
N1 Fe1 N5 N6 -42.40(17) . . . . ? 
N3 Fe1 N5 N6 44.03(17) . . . . ? 
Br1 Fe1 N5 N6 -134.47(16) . . . . ? 
C7 N5 N6 C9 0.5(3) . . . . ? 
Fe1 N5 N6 C9 -178.56(16) . . . . ? 
C7 N5 N6 B1 178.4(2) . . . . ? 
Fe1 N5 N6 B1 -0.7(3) . . . . ? 
C6 N4 B1 N6 -123.9(3) . . . . ? 
N3 N4 B1 N6 64.2(3) . . . . ? 
C6 N4 B1 N2 115.3(3) . . . . ? 
N3 N4 B1 N2 -56.6(3) . . . . ? 
C9 N6 B1 N4 117.2(3) . . . . ? 
N5 N6 B1 N4 -60.3(3) . . . . ? 
C9 N6 B1 N2 -122.7(3) . . . . ? 
N5 N6 B1 N2 59.9(3) . . . . ? 
C3 N2 B1 N4 -125.0(3) . . . . ? 
N1 N2 B1 N4 55.6(3) . . . . ? 
C3 N2 B1 N6 113.9(3) . . . . ? 
N1 N2 B1 N6 -65.5(3) . . . . ? 
N2 N1 C1 C2 -1.8(3) . . . . ? 
Fe1 N1 C1 C2 167.4(2) . . . . ? 
N2 N1 C1 C10 173.3(2) . . . . ? 
Fe1 N1 C1 C10 -17.4(4) . . . . ? 
N1 C1 C2 C3 1.8(3) . . . . ? 
C10 C1 C2 C3 -173.0(2) . . . . ? 
N1 N2 C3 C2 -0.2(3) . . . . ? 
B1 N2 C3 C2 -179.6(2) . . . . ? 
N1 N2 C3 C16 179.4(2) . . . . ? 
B1 N2 C3 C16 -0.1(4) . . . . ? 
C1 C2 C3 N2 -0.9(3) . . . . ? 
C1 C2 C3 C16 179.5(2) . . . . ? 
N4 N3 C4 C5 0.4(3) . . . . ? 
Fe1 N3 C4 C5 178.9(2) . . . . ? 
N4 N3 C4 C22 -173.0(2) . . . . ? 
Fe1 N3 C4 C22 5.4(4) . . . . ? 
N3 C4 C5 C6 -0.8(3) . . . . ? 
C22 C4 C5 C6 172.6(2) . . . . ? 
N3 N4 C6 C5 -0.6(3) . . . . ? 
B1 N4 C6 C5 -173.2(2) . . . . ? 
N3 N4 C6 C28 174.0(2) . . . . ? 
B1 N4 C6 C28 1.4(4) . . . . ? 
C4 C5 C6 N4 0.8(3) . . . . ? 
C4 C5 C6 C28 -173.5(2) . . . . ? 
N6 N5 C7 C8 -0.4(3) . . . . ? 
Fe1 N5 C7 C8 178.2(2) . . . . ? 
N6 N5 C7 C34 179.6(2) . . . . ? 
Fe1 N5 C7 C34 -1.7(4) . . . . ? 
N5 C7 C8 C9 0.2(3) . . . . ? 
C34 C7 C8 C9 -179.9(3) . . . . ? 
N5 N6 C9 C8 -0.3(3) . . . . ? 
B1 N6 C9 C8 -178.0(2) . . . . ? 
N5 N6 C9 C40 177.7(2) . . . . ? 
B1 N6 C9 C40 0.1(4) . . . . ? 
C7 C8 C9 N6 0.1(3) . . . . ? 
C7 C8 C9 C40 -177.9(2) . . . . ? 
N1 C1 C10 C11 153.2(3) . . . . ? 
C2 C1 C10 C11 -32.6(4) . . . . ? 
N1 C1 C10 C15 -30.9(4) . . . . ? 
C2 C1 C10 C15 143.3(3) . . . . ? 
C15 C10 C11 C12 3.1(4) . . . . ? 
C1 C10 C11 C12 179.2(3) . . . . ? 
C10 C11 C12 C13 -2.2(5) . . . . ? 
C11 C12 C13 C14 -0.4(5) . . . . ? 
C12 C13 C14 C15 1.9(5) . . . . ? 
C13 C14 C15 C10 -0.9(4) . . . . ? 
C11 C10 C15 C14 -1.6(4) . . . . ? 
C1 C10 C15 C14 -177.6(2) . . . . ? 
N2 C3 C16 C21 50.1(4) . . . . ? 
C2 C3 C16 C21 -130.4(3) . . . . ? 
N2 C3 C16 C17 -132.6(3) . . . . ? 
C2 C3 C16 C17 46.9(4) . . . . ? 
C21 C16 C17 C18 -1.3(4) . . . . ? 
C3 C16 C17 C18 -178.7(2) . . . . ? 
C16 C17 C18 C19 0.2(4) . . . . ? 
C17 C18 C19 C20 0.8(4) . . . . ? 
C18 C19 C20 C21 -0.8(4) . . . . ? 
C19 C20 C21 C16 -0.2(4) . . . . ? 
C17 C16 C21 C20 1.3(4) . . . . ? 
C3 C16 C21 C20 178.6(2) . . . . ? 
N3 C4 C22 C27 39.5(4) . . . . ? 
C5 C4 C22 C27 -133.0(3) . . . . ? 
N3 C4 C22 C23 -148.2(3) . . . . ? 
C5 C4 C22 C23 39.3(4) . . . . ? 
C27 C22 C23 C24 2.2(4) . . . . ? 
C4 C22 C23 C24 -170.4(3) . . . . ? 
C22 C23 C24 C25 0.4(5) . . . . ? 
C23 C24 C25 C26 -2.9(5) . . . . ? 
C24 C25 C26 C27 2.6(5) . . . . ? 
C25 C26 C27 C22 0.1(4) . . . . ? 
C23 C22 C27 C26 -2.5(4) . . . . ? 
C4 C22 C27 C26 170.0(3) . . . . ? 
N4 C6 C28 C29 -127.5(3) . . . . ? 
C5 C6 C28 C29 46.0(4) . . . . ? 
N4 C6 C28 C33 50.4(4) . . . . ? 
C5 C6 C28 C33 -136.1(3) . . . . ? 
C33 C28 C29 C30 -1.2(4) . . . . ? 
C6 C28 C29 C30 176.7(2) . . . . ? 
C28 C29 C30 C31 0.0(4) . . . . ? 
C29 C30 C31 C32 0.8(4) . . . . ? 
C30 C31 C32 C33 -0.3(4) . . . . ? 
C31 C32 C33 C28 -0.9(4) . . . . ? 
C29 C28 C33 C32 1.7(4) . . . . ? 
C6 C28 C33 C32 -176.2(2) . . . . ? 
N5 C7 C34 C35 -143.8(3) . . . . ? 
C8 C7 C34 C35 36.3(4) . . . . ? 
N5 C7 C34 C39 39.6(4) . . . . ? 
C8 C7 C34 C39 -140.3(3) . . . . ? 
C39 C34 C35 C36 0.5(4) . . . . ? 
C7 C34 C35 C36 -176.3(3) . . . . ? 
C34 C35 C36 C37 -0.4(5) . . . . ? 
C35 C36 C37 C38 -0.3(5) . . . . ? 
C36 C37 C38 C39 0.8(4) . . . . ? 
C37 C38 C39 C34 -0.7(4) . . . . ? 
C35 C34 C39 C38 0.1(4) . . . . ? 
C7 C34 C39 C38 176.7(2) . . . . ? 
N6 C9 C40 C45 -131.5(3) . . . . ? 
C8 C9 C40 C45 46.1(4) . . . . ? 
N6 C9 C40 C41 48.6(4) . . . . ? 
C8 C9 C40 C41 -133.8(3) . . . . ? 
C45 C40 C41 C42 2.2(4) . . . . ? 
C9 C40 C41 C42 -177.9(2) . . . . ? 
C40 C41 C42 C43 -2.3(4) . . . . ? 
C41 C42 C43 C44 0.4(4) . . . . ? 
C42 C43 C44 C45 1.7(4) . . . . ? 
C41 C40 C45 C44 -0.1(4) . . . . ? 
C9 C40 C45 C44 -180.0(2) . . . . ? 
C43 C44 C45 C40 -1.9(4) . . . . ? 
Fe1 O1 C46 C47 14.0(4) . . . . ? 
Fe1 O1 C46 C51 -164.01(19) . . . . ? 
O1 C46 C47 C48 -178.6(3) . . . . ? 
C51 C46 C47 C48 -0.4(4) . . . . ? 
O1 C46 C47 Br1 -1.5(4) . . . . ? 
C51 C46 C47 Br1 176.62(19) . . . . ? 
Fe1 Br1 C47 C48 172.0(2) . . . . ? 
Fe1 Br1 C47 C46 -5.1(2) . . . . ? 
C46 C47 C48 C49 -0.4(5) . . . . ? 
Br1 C47 C48 C49 -177.4(2) . . . . ? 
C47 C48 C49 C50 0.3(5) . . . . ? 
C48 C49 C50 C51 0.6(5) . . . . ? 
C49 C50 C51 C46 -1.5(5) . . . . ? 
C49 C50 C51 Br2 177.9(2) . . . . ? 
O1 C46 C51 C50 179.6(3) . . . . ? 
C47 C46 C51 C50 1.4(4) . . . . ? 
O1 C46 C51 Br2 0.2(3) . . . . ? 
C47 C46 C51 Br2 -178.0(2) . . . . ? 
C55 O2 C52 C53 -35.2(8) . . . . ? 
O2 C52 C53 C54 3.2(11) . . . . ? 
C52 C53 C54 C55 32.6(10) . . . . ? 
C53 C54 C55 O2 -53.6(6) . . . . ? 
C52 O2 C55 C54 55.4(6) . . . . ? 
  
_diffrn_measured_fraction_theta_max    0.994 
_diffrn_reflns_theta_full              33.14 
_diffrn_measured_fraction_theta_full   0.994 
_refine_diff_density_max    0.734 
_refine_diff_density_min   -0.826 
_refine_diff_density_rms    0.108 

#===END

data_3 
  
_audit_creation_method            SHELXL-97 
_chemical_name_systematic 
; 
 3 
; 
_chemical_name_common             holmb01 
_chemical_melting_point           ? 
_chemical_formula_moiety          'C51 H37 B Cl2 Co N6 O' 
_chemical_formula_sum             'C51 H37 B Cl2 Co N6 O' 
_chemical_formula_weight          890.51 
  
loop_ 
 _atom_type_symbol 
 _atom_type_description 
 _atom_type_scat_dispersion_real 
 _atom_type_scat_dispersion_imag 
 _atom_type_scat_source 
 'C'  'C'   0.0033   0.0016 
 'International Tables Vol C Tables 4.2.6.8 and 6.1.1.4' 
 'H'  'H'   0.0000   0.0000 
 'International Tables Vol C Tables 4.2.6.8 and 6.1.1.4' 
 'B'  'B'   0.0013   0.0007 
 'International Tables Vol C Tables 4.2.6.8 and 6.1.1.4' 
 'N'  'N'   0.0061   0.0033 
 'International Tables Vol C Tables 4.2.6.8 and 6.1.1.4' 
 'O'  'O'   0.0106   0.0060 
 'International Tables Vol C Tables 4.2.6.8 and 6.1.1.4' 
 'Cl'  'Cl'   0.1484   0.1585 
 'International Tables Vol C Tables 4.2.6.8 and 6.1.1.4' 
 'Co'  'Co'   0.3494   0.9721 
 'International Tables Vol C Tables 4.2.6.8 and 6.1.1.4' 
  
_symmetry_cell_setting            monoclinic 
_symmetry_space_group_name_H-M    'P 1 21/n 1' 
  
loop_ 
 _symmetry_equiv_pos_as_xyz 
 'x, y, z' 
 '-x+1/2, y+1/2, -z+1/2' 
 '-x, -y, -z' 
 'x-1/2, -y-1/2, z-1/2' 
  
_cell_length_a                    10.2718(15) 
_cell_length_b                    30.796(4) 
_cell_length_c                    13.4527(19) 
_cell_angle_alpha                 90.00 
_cell_angle_beta                  91.876(3) 
_cell_angle_gamma                 90.00 
_cell_volume                      4253.2(10) 
_cell_formula_units_Z             4 
_cell_measurement_temperature     100.0(5) 
_cell_measurement_reflns_used     4030 
_cell_measurement_theta_min       2.38 
_cell_measurement_theta_max       24.22 
  
_exptl_crystal_description        plate 
_exptl_crystal_colour             blue-violet 
_exptl_crystal_size_max           0.24 
_exptl_crystal_size_mid           0.18 
_exptl_crystal_size_min           0.06 
_exptl_crystal_density_meas       ? 
_exptl_crystal_density_diffrn     1.391 
_exptl_crystal_density_method     'not measured' 
_exptl_crystal_F_000              1836 
_exptl_absorpt_coefficient_mu     0.577 
_exptl_absorpt_correction_type    multi-scan 
_exptl_absorpt_correction_T_min   0.8740 
_exptl_absorpt_correction_T_max   0.9662 
_exptl_absorpt_process_details    'SADABS (Sheldrick, 2008)' 
  
_exptl_special_details 
; 
 ? 
; 
  
_diffrn_ambient_temperature       100.0(5) 
_diffrn_radiation_wavelength      0.71073 
_diffrn_radiation_type            MoK\a 
_diffrn_radiation_source          'fine-focus sealed tube' 
_diffrn_radiation_monochromator   graphite 
_diffrn_measurement_device_type   'Bruker SMART APEX II CCD Platform' 
_diffrn_measurement_method        'area detector, \w scans per \f' 
_diffrn_detector_area_resol_mean  ? 
_diffrn_standards_number          0 
_diffrn_standards_interval_count  ? 
_diffrn_standards_interval_time   ? 
_diffrn_standards_decay_%         ? 
_diffrn_reflns_number             63300 
_diffrn_reflns_av_R_equivalents   0.1511 
_diffrn_reflns_av_sigmaI/netI     0.0853 
_diffrn_reflns_limit_h_min        -12 
_diffrn_reflns_limit_h_max        12 
_diffrn_reflns_limit_k_min        -38 
_diffrn_reflns_limit_k_max        38 
_diffrn_reflns_limit_l_min        -16 
_diffrn_reflns_limit_l_max        16 
_diffrn_reflns_theta_min          2.01 
_diffrn_reflns_theta_max          26.37 
_reflns_number_total              8696 
_reflns_number_gt                 5643 
_reflns_threshold_expression      >2sigma(I) 
  
_computing_data_collection        'APEX2 (Bruker, 2011)' 
_computing_cell_refinement        'SAINT (Bruker, 2009)' 
_computing_data_reduction         'SAINT (Bruker, 2009)' 
_computing_structure_solution     'SIR97 (Altomare et al., 1999)' 
_computing_structure_refinement   'SHELXL-97 (Sheldrick, 2008)' 
_computing_molecular_graphics     'SHELXTL (Sheldrick, 2008)' 
_computing_publication_material   'SHELXTL (Sheldrick, 2008)' 
  
_refine_special_details 
; 
 Refinement of F^2^ against ALL reflections.  The weighted R-factor wR and 
 goodness of fit S are based on F^2^, conventional R-factors R are based 
 on F, with F set to zero for negative F^2^. The threshold expression of 
 F^2^ > 2sigma(F^2^) is used only for calculating R-factors(gt) etc. and is 
 not relevant to the choice of reflections for refinement.  R-factors based 
 on F^2^ are statistically about twice as large as those based on F, and R- 
 factors based on ALL data will be even larger. 
; 
  
_refine_ls_structure_factor_coef  Fsqd 
_refine_ls_matrix_type            full 
_refine_ls_weighting_scheme       calc 
_refine_ls_weighting_details 
 'calc w=1/[\s^2^(Fo^2^)+(0.0297P)^2^+6.5283P] where P=(Fo^2^+2Fc^2^)/3' 
_atom_sites_solution_primary      direct 
_atom_sites_solution_secondary    difmap 
_atom_sites_solution_hydrogens    geom 
_refine_ls_hydrogen_treatment     constr 
_refine_ls_extinction_method      none 
_refine_ls_extinction_coef        ? 
_refine_ls_number_reflns          8696 
_refine_ls_number_parameters      559 
_refine_ls_number_restraints      0 
_refine_ls_R_factor_all           0.1150 
_refine_ls_R_factor_gt            0.0662 
_refine_ls_wR_factor_ref          0.1322 
_refine_ls_wR_factor_gt           0.1163 
_refine_ls_goodness_of_fit_ref    1.086 
_refine_ls_restrained_S_all       1.086 
_refine_ls_shift/su_max           0.000 
_refine_ls_shift/su_mean          0.000 
  
loop_ 
 _atom_site_label 
 _atom_site_type_symbol 
 _atom_site_fract_x 
 _atom_site_fract_y 
 _atom_site_fract_z 
 _atom_site_U_iso_or_equiv 
 _atom_site_adp_type 
 _atom_site_occupancy 
 _atom_site_symmetry_multiplicity 
 _atom_site_calc_flag 
 _atom_site_refinement_flags 
 _atom_site_disorder_assembly 
 _atom_site_disorder_group 
Co1 Co 0.81289(5) 0.119985(18) 0.30417(4) 0.02127(14) Uani 1 1 d . . . 
Cl1 Cl 0.98623(10) 0.09583(3) 0.15430(8) 0.0299(2) Uani 1 1 d . . . 
Cl2 Cl 0.81087(13) -0.02886(4) 0.39487(10) 0.0483(3) Uani 1 1 d . . . 
O1 O 0.8502(3) 0.06094(9) 0.3285(2) 0.0262(6) Uani 1 1 d . . . 
N1 N 0.9216(3) 0.17502(11) 0.3213(2) 0.0211(7) Uani 1 1 d . . . 
N2 N 0.8488(3) 0.21247(10) 0.3226(2) 0.0215(7) Uani 1 1 d . . . 
N3 N 0.6806(3) 0.14158(10) 0.4079(2) 0.0208(7) Uani 1 1 d . . . 
N4 N 0.6388(3) 0.18332(10) 0.3860(2) 0.0210(7) Uani 1 1 d . . . 
N5 N 0.6957(3) 0.14340(10) 0.1915(2) 0.0211(7) Uani 1 1 d . . . 
N6 N 0.6701(3) 0.18666(10) 0.2026(2) 0.0194(7) Uani 1 1 d . . . 
B1 B 0.6995(4) 0.20993(16) 0.3018(3) 0.0219(10) Uani 1 1 d . . . 
H1 H 0.6615 0.2398 0.2999 0.026 Uiso 1 1 calc R . . 
C1 C 1.0473(4) 0.18749(14) 0.3279(3) 0.0233(9) Uani 1 1 d . . . 
C2 C 1.0547(4) 0.23234(13) 0.3331(3) 0.0230(9) Uani 1 1 d . . . 
H2 H 1.1317 0.2494 0.3375 0.028 Uiso 1 1 calc R . . 
C3 C 0.9280(4) 0.24742(13) 0.3308(3) 0.0217(9) Uani 1 1 d . . . 
C4 C 0.6142(4) 0.12860(13) 0.4864(3) 0.0231(9) Uani 1 1 d . . . 
C5 C 0.5298(4) 0.16136(13) 0.5154(3) 0.0237(9) Uani 1 1 d . . . 
H5 H 0.4718 0.1603 0.5689 0.028 Uiso 1 1 calc R . . 
C6 C 0.5474(4) 0.19538(13) 0.4512(3) 0.0220(9) Uani 1 1 d . . . 
C7 C 0.6385(4) 0.13064(13) 0.1049(3) 0.0227(9) Uani 1 1 d . . . 
C8 C 0.5781(4) 0.16609(14) 0.0589(3) 0.0245(9) Uani 1 1 d . . . 
H8 H 0.5309 0.1661 -0.0030 0.029 Uiso 1 1 calc R . . 
C9 C 0.5999(4) 0.20103(14) 0.1206(3) 0.0227(9) Uani 1 1 d . . . 
C10 C 1.1541(4) 0.15617(13) 0.3290(3) 0.0234(9) Uani 1 1 d . . . 
C11 C 1.1535(4) 0.11857(14) 0.3851(3) 0.0283(9) Uani 1 1 d . . . 
H11 H 1.0807 0.1120 0.4242 0.034 Uiso 1 1 calc R . . 
C12 C 1.2580(4) 0.09049(14) 0.3845(3) 0.0306(10) Uani 1 1 d . . . 
H12 H 1.2568 0.0648 0.4234 0.037 Uiso 1 1 calc R . . 
C13 C 1.3643(4) 0.09946(14) 0.3280(3) 0.0303(10) Uani 1 1 d . . . 
H13 H 1.4364 0.0801 0.3284 0.036 Uiso 1 1 calc R . . 
C14 C 1.3656(4) 0.13627(15) 0.2716(3) 0.0327(11) Uani 1 1 d . . . 
H14 H 1.4382 0.1423 0.2317 0.039 Uiso 1 1 calc R . . 
C15 C 1.2618(4) 0.16482(14) 0.2721(3) 0.0281(10) Uani 1 1 d . . . 
H15 H 1.2640 0.1906 0.2333 0.034 Uiso 1 1 calc R . . 
C16 C 0.8841(4) 0.29283(13) 0.3375(3) 0.0234(9) Uani 1 1 d . . . 
C17 C 0.7801(4) 0.30550(14) 0.3945(3) 0.0262(9) Uani 1 1 d . . . 
H17 H 0.7314 0.2842 0.4282 0.031 Uiso 1 1 calc R . . 
C18 C 0.7470(4) 0.34868(15) 0.4026(3) 0.0361(11) Uani 1 1 d . . . 
H18 H 0.6755 0.3569 0.4416 0.043 Uiso 1 1 calc R . . 
C19 C 0.8167(5) 0.37992(16) 0.3549(4) 0.0395(11) Uani 1 1 d . . . 
H19 H 0.7934 0.4096 0.3607 0.047 Uiso 1 1 calc R . . 
C20 C 0.9213(5) 0.36818(15) 0.2980(3) 0.0382(12) Uani 1 1 d . . . 
H20 H 0.9700 0.3898 0.2651 0.046 Uiso 1 1 calc R . . 
C21 C 0.9540(4) 0.32509(14) 0.2895(3) 0.0287(10) Uani 1 1 d . . . 
H21 H 1.0254 0.3171 0.2503 0.034 Uiso 1 1 calc R . . 
C22 C 0.6335(4) 0.08676(13) 0.5374(3) 0.0256(9) Uani 1 1 d . . . 
C23 C 0.7557(4) 0.06794(14) 0.5493(3) 0.0295(10) Uani 1 1 d . . . 
H23 H 0.8278 0.0798 0.5161 0.035 Uiso 1 1 calc R . . 
C24 C 0.7726(5) 0.03198(15) 0.6094(3) 0.0394(12) Uani 1 1 d . . . 
H24 H 0.8566 0.0193 0.6174 0.047 Uiso 1 1 calc R . . 
C25 C 0.6691(5) 0.01424(15) 0.6579(3) 0.0424(13) Uani 1 1 d . . . 
H25 H 0.6823 -0.0098 0.7015 0.051 Uiso 1 1 calc R . . 
C26 C 0.5469(5) 0.03147(16) 0.6430(4) 0.0453(13) Uani 1 1 d . . . 
H26 H 0.4744 0.0183 0.6732 0.054 Uiso 1 1 calc R . . 
C27 C 0.5288(4) 0.06779(14) 0.5843(3) 0.0335(10) Uani 1 1 d . . . 
H27 H 0.4442 0.0800 0.5758 0.040 Uiso 1 1 calc R . . 
C28 C 0.4896(4) 0.23911(13) 0.4540(3) 0.0228(9) Uani 1 1 d . . . 
C29 C 0.4900(4) 0.26055(14) 0.5449(3) 0.0280(10) Uani 1 1 d . . . 
H29 H 0.5251 0.2465 0.6026 0.034 Uiso 1 1 calc R . . 
C30 C 0.4401(4) 0.30205(15) 0.5526(3) 0.0342(11) Uani 1 1 d . . . 
H30 H 0.4410 0.3162 0.6154 0.041 Uiso 1 1 calc R . . 
C31 C 0.3893(4) 0.32298(15) 0.4698(3) 0.0330(11) Uani 1 1 d . . . 
H31 H 0.3565 0.3517 0.4749 0.040 Uiso 1 1 calc R . . 
C32 C 0.3865(4) 0.30175(14) 0.3788(3) 0.0294(10) Uani 1 1 d . . . 
H32 H 0.3517 0.3161 0.3213 0.035 Uiso 1 1 calc R . . 
C33 C 0.4341(4) 0.25996(14) 0.3712(3) 0.0279(10) Uani 1 1 d . . . 
H33 H 0.4288 0.2453 0.3090 0.034 Uiso 1 1 calc R . . 
C34 C 0.6458(3) 0.08549(13) 0.0718(3) 0.0237(9) Uani 1 1 d . . . 
C35 C 0.6422(4) 0.05142(14) 0.1384(3) 0.0270(10) Uani 1 1 d . . . 
H35 H 0.6343 0.0574 0.2072 0.032 Uiso 1 1 calc R . . 
C36 C 0.6500(4) 0.00870(14) 0.1066(3) 0.0285(10) Uani 1 1 d . . . 
H36 H 0.6469 -0.0144 0.1534 0.034 Uiso 1 1 calc R . . 
C37 C 0.6623(4) -0.00022(15) 0.0063(3) 0.0339(11) Uani 1 1 d . . . 
H37 H 0.6695 -0.0294 -0.0159 0.041 Uiso 1 1 calc R . . 
C38 C 0.6640(4) 0.03331(15) -0.0607(3) 0.0342(11) Uani 1 1 d . . . 
H38 H 0.6711 0.0271 -0.1295 0.041 Uiso 1 1 calc R . . 
C39 C 0.6557(4) 0.07596(14) -0.0296(3) 0.0269(9) Uani 1 1 d . . . 
H39 H 0.6566 0.0988 -0.0769 0.032 Uiso 1 1 calc R . . 
C40 C 0.5601(4) 0.24668(14) 0.1108(3) 0.0250(9) Uani 1 1 d . . . 
C41 C 0.4276(4) 0.25668(15) 0.0914(3) 0.0294(10) Uani 1 1 d . . . 
H41 H 0.3653 0.2340 0.0832 0.035 Uiso 1 1 calc R . . 
C42 C 0.3890(5) 0.29941(16) 0.0843(3) 0.0380(12) Uani 1 1 d . . . 
H42 H 0.3000 0.3061 0.0704 0.046 Uiso 1 1 calc R . . 
C43 C 0.4783(5) 0.33264(16) 0.0973(3) 0.0415(12) Uani 1 1 d . . . 
H43 H 0.4503 0.3620 0.0937 0.050 Uiso 1 1 calc R . . 
C44 C 0.6089(5) 0.32312(15) 0.1155(3) 0.0388(11) Uani 1 1 d . . . 
H44 H 0.6708 0.3459 0.1236 0.047 Uiso 1 1 calc R . . 
C45 C 0.6478(4) 0.28052(14) 0.1216(3) 0.0294(10) Uani 1 1 d . . . 
H45 H 0.7374 0.2741 0.1337 0.035 Uiso 1 1 calc R . . 
C46 C 0.9039(4) 0.03155(14) 0.2717(3) 0.0237(9) Uani 1 1 d . . . 
C47 C 0.9732(4) 0.04148(13) 0.1859(3) 0.0243(9) Uani 1 1 d . . . 
C48 C 1.0281(4) 0.01021(15) 0.1277(3) 0.0314(10) Uani 1 1 d . . . 
H48 H 1.0756 0.0186 0.0714 0.038 Uiso 1 1 calc R . . 
C49 C 1.0152(4) -0.03307(15) 0.1501(3) 0.0345(11) Uani 1 1 d . . . 
H49 H 1.0525 -0.0546 0.1092 0.041 Uiso 1 1 calc R . . 
C50 C 0.9474(4) -0.04487(14) 0.2324(3) 0.0322(10) Uani 1 1 d . . . 
H50 H 0.9366 -0.0747 0.2485 0.039 Uiso 1 1 calc R . . 
C51 C 0.8953(4) -0.01305(14) 0.2914(3) 0.0284(10) Uani 1 1 d . . . 
  
loop_ 
 _atom_site_aniso_label 
 _atom_site_aniso_U_11 
 _atom_site_aniso_U_22 
 _atom_site_aniso_U_33 
 _atom_site_aniso_U_23 
 _atom_site_aniso_U_13 
 _atom_site_aniso_U_12 
Co1 0.0165(3) 0.0267(3) 0.0205(3) 0.0002(3) -0.00167(19) 0.0002(2) 
Cl1 0.0289(6) 0.0321(6) 0.0287(6) 0.0003(5) 0.0017(4) -0.0009(5) 
Cl2 0.0597(8) 0.0361(7) 0.0506(8) 0.0062(6) 0.0250(6) -0.0011(6) 
O1 0.0272(16) 0.0282(17) 0.0233(16) -0.0014(12) 0.0018(12) 0.0022(13) 
N1 0.0174(17) 0.031(2) 0.0153(17) 0.0022(14) -0.0002(12) 0.0031(15) 
N2 0.0194(17) 0.027(2) 0.0177(17) 0.0015(14) -0.0039(13) 0.0020(14) 
N3 0.0182(17) 0.0222(19) 0.0217(18) -0.0001(14) -0.0024(13) 0.0000(14) 
N4 0.0168(16) 0.0270(19) 0.0192(18) -0.0011(14) -0.0004(13) -0.0019(14) 
N5 0.0182(17) 0.0245(19) 0.0204(17) -0.0028(15) -0.0016(13) -0.0007(14) 
N6 0.0186(17) 0.0235(18) 0.0162(17) -0.0001(14) 0.0013(13) -0.0001(14) 
B1 0.019(2) 0.028(3) 0.018(2) 0.0003(19) -0.0036(17) -0.0013(19) 
C1 0.016(2) 0.035(3) 0.019(2) -0.0007(18) -0.0002(15) -0.0024(17) 
C2 0.016(2) 0.032(2) 0.021(2) -0.0003(18) -0.0004(15) -0.0034(17) 
C3 0.022(2) 0.030(2) 0.013(2) 0.0007(17) 0.0016(15) -0.0052(17) 
C4 0.020(2) 0.029(2) 0.020(2) -0.0033(17) -0.0021(15) -0.0012(17) 
C5 0.023(2) 0.032(2) 0.016(2) -0.0023(18) 0.0013(16) -0.0021(18) 
C6 0.020(2) 0.028(2) 0.018(2) -0.0040(17) -0.0003(15) -0.0010(17) 
C7 0.0155(19) 0.032(2) 0.021(2) 0.0001(17) -0.0030(15) -0.0031(17) 
C8 0.020(2) 0.038(3) 0.015(2) 0.0002(18) -0.0020(15) 0.0005(18) 
C9 0.0160(19) 0.035(2) 0.017(2) 0.0023(18) 0.0017(15) 0.0002(17) 
C10 0.016(2) 0.033(2) 0.021(2) -0.0038(18) -0.0023(15) -0.0039(17) 
C11 0.019(2) 0.038(3) 0.028(2) 0.005(2) 0.0026(16) -0.001(2) 
C12 0.026(2) 0.031(3) 0.034(3) -0.001(2) -0.0024(18) 0.0036(19) 
C13 0.017(2) 0.033(3) 0.040(3) -0.008(2) -0.0020(18) 0.0035(18) 
C14 0.017(2) 0.045(3) 0.036(3) -0.006(2) 0.0061(18) -0.0060(19) 
C15 0.022(2) 0.033(3) 0.030(2) 0.0002(19) 0.0006(17) -0.0046(18) 
C16 0.025(2) 0.028(2) 0.017(2) 0.0002(17) -0.0079(16) -0.0023(18) 
C17 0.024(2) 0.030(2) 0.024(2) -0.0021(19) -0.0030(17) -0.0029(18) 
C18 0.032(3) 0.032(3) 0.043(3) -0.007(2) -0.012(2) 0.003(2) 
C19 0.044(3) 0.025(2) 0.049(3) -0.001(2) -0.016(2) 0.004(2) 
C20 0.044(3) 0.031(3) 0.038(3) 0.006(2) -0.014(2) -0.011(2) 
C21 0.028(2) 0.033(3) 0.024(2) 0.0012(19) -0.0051(17) -0.0036(19) 
C22 0.030(2) 0.029(2) 0.018(2) 0.0004(18) -0.0022(16) -0.0021(18) 
C23 0.032(2) 0.032(3) 0.024(2) -0.0033(19) -0.0088(18) 0.000(2) 
C24 0.046(3) 0.037(3) 0.034(3) -0.002(2) -0.016(2) 0.006(2) 
C25 0.073(4) 0.031(3) 0.023(3) 0.002(2) -0.001(2) 0.006(3) 
C26 0.063(4) 0.034(3) 0.040(3) 0.000(2) 0.018(2) -0.003(3) 
C27 0.038(3) 0.031(3) 0.032(3) 0.002(2) 0.008(2) 0.001(2) 
C28 0.020(2) 0.030(2) 0.019(2) -0.0026(17) 0.0020(15) -0.0001(17) 
C29 0.029(2) 0.031(2) 0.025(2) -0.0022(19) 0.0046(17) -0.0019(19) 
C30 0.037(3) 0.038(3) 0.028(2) -0.003(2) 0.0108(19) -0.001(2) 
C31 0.027(2) 0.029(3) 0.044(3) -0.001(2) 0.010(2) 0.0029(19) 
C32 0.021(2) 0.036(3) 0.032(2) 0.000(2) 0.0002(17) 0.0061(19) 
C33 0.020(2) 0.041(3) 0.022(2) -0.0011(19) -0.0026(17) -0.0040(19) 
C34 0.0121(19) 0.032(2) 0.027(2) -0.0034(19) -0.0023(16) 0.0002(17) 
C35 0.022(2) 0.033(3) 0.025(2) -0.0014(19) -0.0068(17) -0.0012(18) 
C36 0.019(2) 0.030(2) 0.036(3) 0.002(2) -0.0034(18) -0.0015(18) 
C37 0.020(2) 0.036(3) 0.045(3) -0.012(2) -0.0041(19) 0.0021(19) 
C38 0.025(2) 0.046(3) 0.032(3) -0.012(2) -0.0029(18) -0.003(2) 
C39 0.022(2) 0.035(3) 0.023(2) -0.0041(19) 0.0002(17) -0.0015(18) 
C40 0.026(2) 0.034(2) 0.015(2) 0.0036(18) -0.0008(16) 0.0028(19) 
C41 0.027(2) 0.041(3) 0.020(2) 0.0002(19) -0.0041(17) 0.007(2) 
C42 0.039(3) 0.049(3) 0.026(3) 0.003(2) -0.006(2) 0.016(2) 
C43 0.058(3) 0.031(3) 0.034(3) 0.003(2) -0.001(2) 0.016(2) 
C44 0.048(3) 0.033(3) 0.035(3) 0.007(2) -0.003(2) -0.002(2) 
C45 0.029(2) 0.033(3) 0.026(2) 0.0049(19) -0.0028(18) 0.001(2) 
C46 0.0151(19) 0.033(2) 0.023(2) -0.0033(19) -0.0029(15) 0.0067(17) 
C47 0.017(2) 0.029(2) 0.026(2) -0.0010(18) -0.0060(16) -0.0011(17) 
C48 0.024(2) 0.040(3) 0.031(2) -0.005(2) 0.0010(18) 0.001(2) 
C49 0.030(2) 0.035(3) 0.039(3) -0.009(2) -0.002(2) 0.003(2) 
C50 0.029(2) 0.028(3) 0.040(3) -0.002(2) -0.004(2) 0.0002(19) 
C51 0.019(2) 0.038(3) 0.028(2) 0.003(2) 0.0023(17) 0.0007(19) 
  
_geom_special_details 
; 
 All esds (except the esd in the dihedral angle between two l.s. planes) 
 are estimated using the full covariance matrix.  The cell esds are taken 
 into account individually in the estimation of esds in distances, angles 
 and torsion angles; correlations between esds in cell parameters are only 
 used when they are defined by crystal symmetry.  An approximate (isotropic) 
 treatment of cell esds is used for estimating esds involving l.s. planes. 
; 
  
loop_ 
 _geom_bond_atom_site_label_1 
 _geom_bond_atom_site_label_2 
 _geom_bond_distance 
 _geom_bond_site_symmetry_2 
 _geom_bond_publ_flag 
Co1 O1 1.885(3) . ? 
Co1 N5 2.036(3) . ? 
Co1 N1 2.038(3) . ? 
Co1 N3 2.088(3) . ? 
Cl1 C47 1.733(4) . ? 
Cl2 C51 1.734(4) . ? 
O1 C46 1.317(5) . ? 
N1 C1 1.348(5) . ? 
N1 N2 1.375(4) . ? 
N2 C3 1.352(5) . ? 
N2 B1 1.551(5) . ? 
N3 C4 1.337(5) . ? 
N3 N4 1.384(4) . ? 
N4 C6 1.358(5) . ? 
N4 B1 1.545(5) . ? 
N5 C7 1.347(5) . ? 
N5 N6 1.367(4) . ? 
N6 C9 1.371(5) . ? 
N6 B1 1.537(5) . ? 
B1 H1 1.0000 . ? 
C1 C2 1.385(6) . ? 
C1 C10 1.460(5) . ? 
C2 C3 1.380(5) . ? 
C2 H2 0.9500 . ? 
C3 C16 1.473(6) . ? 
C4 C5 1.394(5) . ? 
C4 C22 1.470(6) . ? 
C5 C6 1.373(5) . ? 
C5 H5 0.9500 . ? 
C6 C28 1.472(6) . ? 
C7 C8 1.391(5) . ? 
C7 C34 1.462(6) . ? 
C8 C9 1.374(6) . ? 
C8 H8 0.9500 . ? 
C9 C40 1.469(6) . ? 
C10 C11 1.382(6) . ? 
C10 C15 1.391(5) . ? 
C11 C12 1.379(6) . ? 
C11 H11 0.9500 . ? 
C12 C13 1.379(6) . ? 
C12 H12 0.9500 . ? 
C13 C14 1.365(6) . ? 
C13 H13 0.9500 . ? 
C14 C15 1.383(6) . ? 
C14 H14 0.9500 . ? 
C15 H15 0.9500 . ? 
C16 C17 1.392(6) . ? 
C16 C21 1.396(6) . ? 
C17 C18 1.378(6) . ? 
C17 H17 0.9500 . ? 
C18 C19 1.372(6) . ? 
C18 H18 0.9500 . ? 
C19 C20 1.387(7) . ? 
C19 H19 0.9500 . ? 
C20 C21 1.375(6) . ? 
C20 H20 0.9500 . ? 
C21 H21 0.9500 . ? 
C22 C23 1.387(6) . ? 
C22 C27 1.394(6) . ? 
C23 C24 1.379(6) . ? 
C23 H23 0.9500 . ? 
C24 C25 1.379(7) . ? 
C24 H24 0.9500 . ? 
C25 C26 1.372(7) . ? 
C25 H25 0.9500 . ? 
C26 C27 1.378(6) . ? 
C26 H26 0.9500 . ? 
C27 H27 0.9500 . ? 
C28 C33 1.392(5) . ? 
C28 C29 1.389(5) . ? 
C29 C30 1.382(6) . ? 
C29 H29 0.9500 . ? 
C30 C31 1.374(6) . ? 
C30 H30 0.9500 . ? 
C31 C32 1.388(6) . ? 
C31 H31 0.9500 . ? 
C32 C33 1.382(6) . ? 
C32 H32 0.9500 . ? 
C33 H33 0.9500 . ? 
C34 C35 1.381(6) . ? 
C34 C39 1.402(5) . ? 
C35 C36 1.386(6) . ? 
C35 H35 0.9500 . ? 
C36 C37 1.387(6) . ? 
C36 H36 0.9500 . ? 
C37 C38 1.371(6) . ? 
C37 H37 0.9500 . ? 
C38 C39 1.382(6) . ? 
C38 H38 0.9500 . ? 
C39 H39 0.9500 . ? 
C40 C45 1.382(6) . ? 
C40 C41 1.412(5) . ? 
C41 C42 1.377(6) . ? 
C41 H41 0.9500 . ? 
C42 C43 1.382(7) . ? 
C42 H42 0.9500 . ? 
C43 C44 1.387(6) . ? 
C43 H43 0.9500 . ? 
C44 C45 1.373(6) . ? 
C44 H44 0.9500 . ? 
C45 H45 0.9500 . ? 
C46 C51 1.402(6) . ? 
C46 C47 1.410(5) . ? 
C47 C48 1.374(6) . ? 
C48 C49 1.374(6) . ? 
C48 H48 0.9500 . ? 
C49 C50 1.377(6) . ? 
C49 H49 0.9500 . ? 
C50 C51 1.380(6) . ? 
C50 H50 0.9500 . ? 
  
loop_ 
 _geom_angle_atom_site_label_1 
 _geom_angle_atom_site_label_2 
 _geom_angle_atom_site_label_3 
 _geom_angle 
 _geom_angle_site_symmetry_1 
 _geom_angle_site_symmetry_3 
 _geom_angle_publ_flag 
O1 Co1 N5 125.66(12) . . ? 
O1 Co1 N1 132.45(12) . . ? 
N5 Co1 N1 95.63(12) . . ? 
O1 Co1 N3 108.90(12) . . ? 
N5 Co1 N3 90.15(12) . . ? 
N1 Co1 N3 91.47(12) . . ? 
C46 O1 Co1 130.4(3) . . ? 
C1 N1 N2 106.3(3) . . ? 
C1 N1 Co1 139.9(3) . . ? 
N2 N1 Co1 113.7(2) . . ? 
C3 N2 N1 110.0(3) . . ? 
C3 N2 B1 130.1(3) . . ? 
N1 N2 B1 119.4(3) . . ? 
C4 N3 N4 106.5(3) . . ? 
C4 N3 Co1 142.4(3) . . ? 
N4 N3 Co1 110.9(2) . . ? 
C6 N4 N3 109.4(3) . . ? 
C6 N4 B1 129.2(3) . . ? 
N3 N4 B1 121.3(3) . . ? 
C7 N5 N6 107.4(3) . . ? 
C7 N5 Co1 140.5(3) . . ? 
N6 N5 Co1 112.0(2) . . ? 
N5 N6 C9 109.0(3) . . ? 
N5 N6 B1 121.1(3) . . ? 
C9 N6 B1 129.2(3) . . ? 
N6 B1 N4 108.5(3) . . ? 
N6 B1 N2 110.2(3) . . ? 
N4 B1 N2 108.4(3) . . ? 
N6 B1 H1 109.9 . . ? 
N4 B1 H1 109.9 . . ? 
N2 B1 H1 109.9 . . ? 
N1 C1 C2 109.7(3) . . ? 
N1 C1 C10 122.0(4) . . ? 
C2 C1 C10 128.2(3) . . ? 
C3 C2 C1 106.6(3) . . ? 
C3 C2 H2 126.7 . . ? 
C1 C2 H2 126.7 . . ? 
N2 C3 C2 107.4(4) . . ? 
N2 C3 C16 125.1(3) . . ? 
C2 C3 C16 127.5(4) . . ? 
N3 C4 C5 110.0(4) . . ? 
N3 C4 C22 124.5(4) . . ? 
C5 C4 C22 125.4(4) . . ? 
C6 C5 C4 106.3(4) . . ? 
C6 C5 H5 126.8 . . ? 
C4 C5 H5 126.8 . . ? 
N4 C6 C5 107.8(3) . . ? 
N4 C6 C28 123.7(4) . . ? 
C5 C6 C28 128.3(4) . . ? 
N5 C7 C8 109.4(3) . . ? 
N5 C7 C34 121.0(3) . . ? 
C8 C7 C34 129.6(4) . . ? 
C9 C8 C7 106.5(3) . . ? 
C9 C8 H8 126.7 . . ? 
C7 C8 H8 126.7 . . ? 
N6 C9 C8 107.7(4) . . ? 
N6 C9 C40 121.3(3) . . ? 
C8 C9 C40 131.0(4) . . ? 
C11 C10 C15 118.6(4) . . ? 
C11 C10 C1 122.8(4) . . ? 
C15 C10 C1 118.6(4) . . ? 
C12 C11 C10 120.4(4) . . ? 
C12 C11 H11 119.8 . . ? 
C10 C11 H11 119.8 . . ? 
C13 C12 C11 120.5(4) . . ? 
C13 C12 H12 119.7 . . ? 
C11 C12 H12 119.7 . . ? 
C14 C13 C12 119.7(4) . . ? 
C14 C13 H13 120.1 . . ? 
C12 C13 H13 120.1 . . ? 
C13 C14 C15 120.2(4) . . ? 
C13 C14 H14 119.9 . . ? 
C15 C14 H14 119.9 . . ? 
C14 C15 C10 120.6(4) . . ? 
C14 C15 H15 119.7 . . ? 
C10 C15 H15 119.7 . . ? 
C17 C16 C21 118.1(4) . . ? 
C17 C16 C3 122.8(4) . . ? 
C21 C16 C3 118.9(4) . . ? 
C18 C17 C16 120.7(4) . . ? 
C18 C17 H17 119.7 . . ? 
C16 C17 H17 119.7 . . ? 
C19 C18 C17 120.4(5) . . ? 
C19 C18 H18 119.8 . . ? 
C17 C18 H18 119.8 . . ? 
C18 C19 C20 120.1(4) . . ? 
C18 C19 H19 120.0 . . ? 
C20 C19 H19 120.0 . . ? 
C21 C20 C19 119.6(4) . . ? 
C21 C20 H20 120.2 . . ? 
C19 C20 H20 120.2 . . ? 
C20 C21 C16 121.2(4) . . ? 
C20 C21 H21 119.4 . . ? 
C16 C21 H21 119.4 . . ? 
C23 C22 C27 118.8(4) . . ? 
C23 C22 C4 121.9(4) . . ? 
C27 C22 C4 119.0(4) . . ? 
C24 C23 C22 120.0(4) . . ? 
C24 C23 H23 120.0 . . ? 
C22 C23 H23 120.0 . . ? 
C23 C24 C25 120.8(5) . . ? 
C23 C24 H24 119.6 . . ? 
C25 C24 H24 119.6 . . ? 
C26 C25 C24 119.6(5) . . ? 
C26 C25 H25 120.2 . . ? 
C24 C25 H25 120.2 . . ? 
C25 C26 C27 120.2(5) . . ? 
C25 C26 H26 119.9 . . ? 
C27 C26 H26 119.9 . . ? 
C26 C27 C22 120.5(4) . . ? 
C26 C27 H27 119.7 . . ? 
C22 C27 H27 119.7 . . ? 
C33 C28 C29 118.3(4) . . ? 
C33 C28 C6 123.8(4) . . ? 
C29 C28 C6 117.9(4) . . ? 
C30 C29 C28 121.0(4) . . ? 
C30 C29 H29 119.5 . . ? 
C28 C29 H29 119.5 . . ? 
C31 C30 C29 120.3(4) . . ? 
C31 C30 H30 119.8 . . ? 
C29 C30 H30 119.8 . . ? 
C30 C31 C32 119.4(4) . . ? 
C30 C31 H31 120.3 . . ? 
C32 C31 H31 120.3 . . ? 
C33 C32 C31 120.4(4) . . ? 
C33 C32 H32 119.8 . . ? 
C31 C32 H32 119.8 . . ? 
C32 C33 C28 120.5(4) . . ? 
C32 C33 H33 119.8 . . ? 
C28 C33 H33 119.8 . . ? 
C35 C34 C39 118.4(4) . . ? 
C35 C34 C7 121.5(4) . . ? 
C39 C34 C7 120.1(4) . . ? 
C34 C35 C36 121.2(4) . . ? 
C34 C35 H35 119.4 . . ? 
C36 C35 H35 119.4 . . ? 
C35 C36 C37 119.7(4) . . ? 
C35 C36 H36 120.1 . . ? 
C37 C36 H36 120.1 . . ? 
C38 C37 C36 119.6(4) . . ? 
C38 C37 H37 120.2 . . ? 
C36 C37 H37 120.2 . . ? 
C37 C38 C39 121.0(4) . . ? 
C37 C38 H38 119.5 . . ? 
C39 C38 H38 119.5 . . ? 
C38 C39 C34 120.0(4) . . ? 
C38 C39 H39 120.0 . . ? 
C34 C39 H39 120.0 . . ? 
C45 C40 C41 118.4(4) . . ? 
C45 C40 C9 122.2(4) . . ? 
C41 C40 C9 119.3(4) . . ? 
C42 C41 C40 119.7(4) . . ? 
C42 C41 H41 120.2 . . ? 
C40 C41 H41 120.2 . . ? 
C41 C42 C43 120.7(4) . . ? 
C41 C42 H42 119.6 . . ? 
C43 C42 H42 119.6 . . ? 
C42 C43 C44 120.0(4) . . ? 
C42 C43 H43 120.0 . . ? 
C44 C43 H43 120.0 . . ? 
C45 C44 C43 119.4(4) . . ? 
C45 C44 H44 120.3 . . ? 
C43 C44 H44 120.3 . . ? 
C44 C45 C40 121.8(4) . . ? 
C44 C45 H45 119.1 . . ? 
C40 C45 H45 119.1 . . ? 
O1 C46 C51 122.3(4) . . ? 
O1 C46 C47 124.0(4) . . ? 
C51 C46 C47 113.8(4) . . ? 
C48 C47 C46 122.8(4) . . ? 
C48 C47 Cl1 120.1(3) . . ? 
C46 C47 Cl1 117.1(3) . . ? 
C49 C48 C47 120.7(4) . . ? 
C49 C48 H48 119.6 . . ? 
C47 C48 H48 119.6 . . ? 
C48 C49 C50 119.2(4) . . ? 
C48 C49 H49 120.4 . . ? 
C50 C49 H49 120.4 . . ? 
C49 C50 C51 119.4(4) . . ? 
C49 C50 H50 120.3 . . ? 
C51 C50 H50 120.3 . . ? 
C50 C51 C46 124.0(4) . . ? 
C50 C51 Cl2 118.4(3) . . ? 
C46 C51 Cl2 117.6(3) . . ? 
  
loop_ 
 _geom_torsion_atom_site_label_1 
 _geom_torsion_atom_site_label_2 
 _geom_torsion_atom_site_label_3 
 _geom_torsion_atom_site_label_4 
 _geom_torsion 
 _geom_torsion_site_symmetry_1 
 _geom_torsion_site_symmetry_2 
 _geom_torsion_site_symmetry_3 
 _geom_torsion_site_symmetry_4 
 _geom_torsion_publ_flag 
N5 Co1 O1 C46 59.1(4) . . . . ? 
N1 Co1 O1 C46 -86.0(3) . . . . ? 
N3 Co1 O1 C46 163.5(3) . . . . ? 
O1 Co1 N1 C1 21.8(5) . . . . ? 
N5 Co1 N1 C1 -130.3(4) . . . . ? 
N3 Co1 N1 C1 139.4(4) . . . . ? 
O1 Co1 N1 N2 -162.1(2) . . . . ? 
N5 Co1 N1 N2 45.7(2) . . . . ? 
N3 Co1 N1 N2 -44.6(2) . . . . ? 
C1 N1 N2 C3 -0.6(4) . . . . ? 
Co1 N1 N2 C3 -178.0(2) . . . . ? 
C1 N1 N2 B1 171.8(3) . . . . ? 
Co1 N1 N2 B1 -5.5(4) . . . . ? 
O1 Co1 N3 C4 1.3(4) . . . . ? 
N5 Co1 N3 C4 129.4(4) . . . . ? 
N1 Co1 N3 C4 -135.0(4) . . . . ? 
O1 Co1 N3 N4 -173.2(2) . . . . ? 
N5 Co1 N3 N4 -45.1(2) . . . . ? 
N1 Co1 N3 N4 50.6(2) . . . . ? 
C4 N3 N4 C6 -0.1(4) . . . . ? 
Co1 N3 N4 C6 176.4(2) . . . . ? 
C4 N3 N4 B1 177.0(3) . . . . ? 
Co1 N3 N4 B1 -6.5(4) . . . . ? 
O1 Co1 N5 C7 -14.7(5) . . . . ? 
N1 Co1 N5 C7 140.2(4) . . . . ? 
N3 Co1 N5 C7 -128.3(4) . . . . ? 
O1 Co1 N5 N6 169.8(2) . . . . ? 
N1 Co1 N5 N6 -35.3(2) . . . . ? 
N3 Co1 N5 N6 56.2(2) . . . . ? 
C7 N5 N6 C9 -1.8(4) . . . . ? 
Co1 N5 N6 C9 175.2(2) . . . . ? 
C7 N5 N6 B1 168.8(3) . . . . ? 
Co1 N5 N6 B1 -14.2(4) . . . . ? 
N5 N6 B1 N4 -50.5(4) . . . . ? 
C9 N6 B1 N4 118.1(4) . . . . ? 
N5 N6 B1 N2 68.0(4) . . . . ? 
C9 N6 B1 N2 -123.4(4) . . . . ? 
C6 N4 B1 N6 -120.0(4) . . . . ? 
N3 N4 B1 N6 63.5(4) . . . . ? 
C6 N4 B1 N2 120.4(4) . . . . ? 
N3 N4 B1 N2 -56.1(4) . . . . ? 
C3 N2 B1 N6 116.6(4) . . . . ? 
N1 N2 B1 N6 -54.1(4) . . . . ? 
C3 N2 B1 N4 -124.9(4) . . . . ? 
N1 N2 B1 N4 64.4(4) . . . . ? 
N2 N1 C1 C2 -0.1(4) . . . . ? 
Co1 N1 C1 C2 176.1(3) . . . . ? 
N2 N1 C1 C10 179.9(3) . . . . ? 
Co1 N1 C1 C10 -3.9(6) . . . . ? 
N1 C1 C2 C3 0.7(4) . . . . ? 
C10 C1 C2 C3 -179.2(4) . . . . ? 
N1 N2 C3 C2 1.1(4) . . . . ? 
B1 N2 C3 C2 -170.3(4) . . . . ? 
N1 N2 C3 C16 -178.1(3) . . . . ? 
B1 N2 C3 C16 10.5(6) . . . . ? 
C1 C2 C3 N2 -1.1(4) . . . . ? 
C1 C2 C3 C16 178.0(4) . . . . ? 
N4 N3 C4 C5 0.1(4) . . . . ? 
Co1 N3 C4 C5 -174.5(3) . . . . ? 
N4 N3 C4 C22 -176.7(3) . . . . ? 
Co1 N3 C4 C22 8.7(7) . . . . ? 
N3 C4 C5 C6 -0.2(4) . . . . ? 
C22 C4 C5 C6 176.7(4) . . . . ? 
N3 N4 C6 C5 0.0(4) . . . . ? 
B1 N4 C6 C5 -176.8(3) . . . . ? 
N3 N4 C6 C28 175.1(3) . . . . ? 
B1 N4 C6 C28 -1.7(6) . . . . ? 
C4 C5 C6 N4 0.1(4) . . . . ? 
C4 C5 C6 C28 -174.7(4) . . . . ? 
N6 N5 C7 C8 1.2(4) . . . . ? 
Co1 N5 C7 C8 -174.4(3) . . . . ? 
N6 N5 C7 C34 -178.9(3) . . . . ? 
Co1 N5 C7 C34 5.5(6) . . . . ? 
N5 C7 C8 C9 -0.1(4) . . . . ? 
C34 C7 C8 C9 180.0(4) . . . . ? 
N5 N6 C9 C8 1.8(4) . . . . ? 
B1 N6 C9 C8 -167.9(4) . . . . ? 
N5 N6 C9 C40 -178.9(3) . . . . ? 
B1 N6 C9 C40 11.4(6) . . . . ? 
C7 C8 C9 N6 -1.0(4) . . . . ? 
C7 C8 C9 C40 179.8(4) . . . . ? 
N1 C1 C10 C11 -44.1(6) . . . . ? 
C2 C1 C10 C11 135.8(4) . . . . ? 
N1 C1 C10 C15 136.8(4) . . . . ? 
C2 C1 C10 C15 -43.3(6) . . . . ? 
C15 C10 C11 C12 0.2(6) . . . . ? 
C1 C10 C11 C12 -178.9(4) . . . . ? 
C10 C11 C12 C13 -0.1(6) . . . . ? 
C11 C12 C13 C14 -0.5(6) . . . . ? 
C12 C13 C14 C15 1.0(6) . . . . ? 
C13 C14 C15 C10 -0.9(6) . . . . ? 
C11 C10 C15 C14 0.3(6) . . . . ? 
C1 C10 C15 C14 179.4(4) . . . . ? 
N2 C3 C16 C17 41.5(6) . . . . ? 
C2 C3 C16 C17 -137.5(4) . . . . ? 
N2 C3 C16 C21 -142.5(4) . . . . ? 
C2 C3 C16 C21 38.5(6) . . . . ? 
C21 C16 C17 C18 0.4(6) . . . . ? 
C3 C16 C17 C18 176.5(4) . . . . ? 
C16 C17 C18 C19 -0.3(6) . . . . ? 
C17 C18 C19 C20 -0.1(6) . . . . ? 
C18 C19 C20 C21 0.3(6) . . . . ? 
C19 C20 C21 C16 -0.2(6) . . . . ? 
C17 C16 C21 C20 -0.1(6) . . . . ? 
C3 C16 C21 C20 -176.4(4) . . . . ? 
N3 C4 C22 C23 36.1(6) . . . . ? 
C5 C4 C22 C23 -140.3(4) . . . . ? 
N3 C4 C22 C27 -151.0(4) . . . . ? 
C5 C4 C22 C27 32.7(6) . . . . ? 
C27 C22 C23 C24 -2.1(6) . . . . ? 
C4 C22 C23 C24 170.8(4) . . . . ? 
C22 C23 C24 C25 0.2(7) . . . . ? 
C23 C24 C25 C26 2.8(7) . . . . ? 
C24 C25 C26 C27 -3.7(7) . . . . ? 
C25 C26 C27 C22 1.7(7) . . . . ? 
C23 C22 C27 C26 1.2(6) . . . . ? 
C4 C22 C27 C26 -172.0(4) . . . . ? 
N4 C6 C28 C33 52.1(6) . . . . ? 
C5 C6 C28 C33 -133.8(4) . . . . ? 
N4 C6 C28 C29 -128.4(4) . . . . ? 
C5 C6 C28 C29 45.7(6) . . . . ? 
C33 C28 C29 C30 -1.9(6) . . . . ? 
C6 C28 C29 C30 178.5(4) . . . . ? 
C28 C29 C30 C31 -0.2(6) . . . . ? 
C29 C30 C31 C32 1.1(6) . . . . ? 
C30 C31 C32 C33 0.1(6) . . . . ? 
C31 C32 C33 C28 -2.3(6) . . . . ? 
C29 C28 C33 C32 3.1(6) . . . . ? 
C6 C28 C33 C32 -177.3(4) . . . . ? 
N5 C7 C34 C35 36.2(5) . . . . ? 
C8 C7 C34 C35 -143.9(4) . . . . ? 
N5 C7 C34 C39 -144.2(4) . . . . ? 
C8 C7 C34 C39 35.7(6) . . . . ? 
C39 C34 C35 C36 0.8(6) . . . . ? 
C7 C34 C35 C36 -179.6(3) . . . . ? 
C34 C35 C36 C37 0.4(6) . . . . ? 
C35 C36 C37 C38 -1.3(6) . . . . ? 
C36 C37 C38 C39 1.0(6) . . . . ? 
C37 C38 C39 C34 0.2(6) . . . . ? 
C35 C34 C39 C38 -1.2(6) . . . . ? 
C7 C34 C39 C38 179.2(3) . . . . ? 
N6 C9 C40 C45 52.3(6) . . . . ? 
C8 C9 C40 C45 -128.5(5) . . . . ? 
N6 C9 C40 C41 -126.5(4) . . . . ? 
C8 C9 C40 C41 52.6(6) . . . . ? 
C45 C40 C41 C42 -0.4(6) . . . . ? 
C9 C40 C41 C42 178.5(4) . . . . ? 
C40 C41 C42 C43 -0.8(6) . . . . ? 
C41 C42 C43 C44 1.4(7) . . . . ? 
C42 C43 C44 C45 -0.8(7) . . . . ? 
C43 C44 C45 C40 -0.4(7) . . . . ? 
C41 C40 C45 C44 1.0(6) . . . . ? 
C9 C40 C45 C44 -177.9(4) . . . . ? 
Co1 O1 C46 C51 -163.8(3) . . . . ? 
Co1 O1 C46 C47 15.4(5) . . . . ? 
O1 C46 C47 C48 -179.9(4) . . . . ? 
C51 C46 C47 C48 -0.6(5) . . . . ? 
O1 C46 C47 Cl1 -0.5(5) . . . . ? 
C51 C46 C47 Cl1 178.8(3) . . . . ? 
C46 C47 C48 C49 1.4(6) . . . . ? 
Cl1 C47 C48 C49 -178.0(3) . . . . ? 
C47 C48 C49 C50 -0.7(6) . . . . ? 
C48 C49 C50 C51 -0.8(6) . . . . ? 
C49 C50 C51 C46 1.7(6) . . . . ? 
C49 C50 C51 Cl2 -179.8(3) . . . . ? 
O1 C46 C51 C50 178.4(4) . . . . ? 
C47 C46 C51 C50 -1.0(6) . . . . ? 
O1 C46 C51 Cl2 -0.2(5) . . . . ? 
C47 C46 C51 Cl2 -179.5(3) . . . . ? 
  
_diffrn_measured_fraction_theta_max    1.000 
_diffrn_reflns_theta_full              26.37 
_diffrn_measured_fraction_theta_full   1.000 
_refine_diff_density_max    0.539 
_refine_diff_density_min   -0.477 
_refine_diff_density_rms    0.078 

#===END

data_4 
  
_vrf_RINTA01_4 
; 
PROBLEM: _B  The value of Rint is greater than 0.18 
             Rint given   0.183 
RESPONSE: The small crystal diffracted weakly. 
; 
  
_vrf_PLAT341_4 
; 
PROBLEM: _C Low Bond Precision on  C-C Bonds ............... 0.0088 Ang 
RESPONSE: See above. 
; 
  
_audit_creation_method            SHELXL-97 
_chemical_name_systematic 
; 
 4 
; 
_chemical_name_common             holmb04 
_chemical_melting_point           ? 
_chemical_formula_moiety          'C51 H37 B Br2 Co N6 O' 
_chemical_formula_sum             'C51 H37 B Br2 Co N6 O' 
_chemical_formula_weight          979.43 
  
loop_ 
 _atom_type_symbol 
 _atom_type_description 
 _atom_type_scat_dispersion_real 
 _atom_type_scat_dispersion_imag 
 _atom_type_scat_source 
 'C'  'C'   0.0033   0.0016 
 'International Tables Vol C Tables 4.2.6.8 and 6.1.1.4' 
 'H'  'H'   0.0000   0.0000 
 'International Tables Vol C Tables 4.2.6.8 and 6.1.1.4' 
 'B'  'B'   0.0013   0.0007 
 'International Tables Vol C Tables 4.2.6.8 and 6.1.1.4' 
 'N'  'N'   0.0061   0.0033 
 'International Tables Vol C Tables 4.2.6.8 and 6.1.1.4' 
 'O'  'O'   0.0106   0.0060 
 'International Tables Vol C Tables 4.2.6.8 and 6.1.1.4' 
 'Co'  'Co'   0.3494   0.9721 
 'International Tables Vol C Tables 4.2.6.8 and 6.1.1.4' 
 'Br'  'Br'  -0.2901   2.4595 
 'International Tables Vol C Tables 4.2.6.8 and 6.1.1.4' 
  
_symmetry_cell_setting            monoclinic 
_symmetry_space_group_name_H-M    'P 1 21/n 1' 
  
loop_ 
 _symmetry_equiv_pos_as_xyz 
 'x, y, z' 
 '-x+1/2, y+1/2, -z+1/2' 
 '-x, -y, -z' 
 'x-1/2, -y-1/2, z-1/2' 
  
_cell_length_a                    10.2332(11) 
_cell_length_b                    30.514(3) 
_cell_length_c                    13.6761(15) 
_cell_angle_alpha                 90.00 
_cell_angle_beta                  91.362(2) 
_cell_angle_gamma                 90.00 
_cell_volume                      4269.2(8) 
_cell_formula_units_Z             4 
_cell_measurement_temperature     100.0(5) 
_cell_measurement_reflns_used     4087 
_cell_measurement_theta_min       2.40 
_cell_measurement_theta_max       23.79 
  
_exptl_crystal_description        plate 
_exptl_crystal_colour             blue-violet 
_exptl_crystal_size_max           0.22 
_exptl_crystal_size_mid           0.18 
_exptl_crystal_size_min           0.05 
_exptl_crystal_density_meas       ? 
_exptl_crystal_density_diffrn     1.524 
_exptl_crystal_density_method     'not measured' 
_exptl_crystal_F_000              1980 
_exptl_absorpt_coefficient_mu     2.321 
_exptl_absorpt_correction_type    multi-scan 
_exptl_absorpt_correction_T_min   0.6292 
_exptl_absorpt_correction_T_max   0.8928 
_exptl_absorpt_process_details    'SADABS (Sheldrick, 2008)' 
  
_exptl_special_details 
; 
 ? 
; 
  
_diffrn_ambient_temperature       100.0(5) 
_diffrn_radiation_wavelength      0.71073 
_diffrn_radiation_type            MoK\a 
_diffrn_radiation_source          'fine-focus sealed tube' 
_diffrn_radiation_monochromator   graphite 
_diffrn_measurement_device_type   'Bruker SMART APEX II CCD Platform' 
_diffrn_measurement_method        'area detector, \w scans per \f' 
_diffrn_detector_area_resol_mean  ? 
_diffrn_standards_number          0 
_diffrn_standards_interval_count  ? 
_diffrn_standards_interval_time   ? 
_diffrn_standards_decay_%         ? 
_diffrn_reflns_number             52961 
_diffrn_reflns_av_R_equivalents   0.1834 
_diffrn_reflns_av_sigmaI/netI     0.1069 
_diffrn_reflns_limit_h_min        -12 
_diffrn_reflns_limit_h_max        12 
_diffrn_reflns_limit_k_min        -36 
_diffrn_reflns_limit_k_max        36 
_diffrn_reflns_limit_l_min        -16 
_diffrn_reflns_limit_l_max        16 
_diffrn_reflns_theta_min          2.00 
_diffrn_reflns_theta_max          25.03 
_reflns_number_total              7550 
_reflns_number_gt                 4642 
_reflns_threshold_expression      >2sigma(I) 
  
_computing_data_collection        'APEX2 (Bruker, 2011)' 
_computing_cell_refinement        'SAINT (Bruker, 2009)' 
_computing_data_reduction         'SAINT (Bruker, 2009)' 
_computing_structure_solution     'SIR97 (Altomare et al., 1999)' 
_computing_structure_refinement   'SHELXL-97 (Sheldrick, 2008)' 
_computing_molecular_graphics     'SHELXTL (Sheldrick, 2008)' 
_computing_publication_material   'SHELXTL (Sheldrick, 2008)' 
  
_refine_special_details 
; 
 Refinement of F^2^ against ALL reflections.  The weighted R-factor wR and 
 goodness of fit S are based on F^2^, conventional R-factors R are based 
 on F, with F set to zero for negative F^2^. The threshold expression of 
 F^2^ > 2sigma(F^2^) is used only for calculating R-factors(gt) etc. and is 
 not relevant to the choice of reflections for refinement.  R-factors based 
 on F^2^ are statistically about twice as large as those based on F, and R- 
 factors based on ALL data will be even larger. 
; 
  
_refine_ls_structure_factor_coef  Fsqd 
_refine_ls_matrix_type            full 
_refine_ls_weighting_scheme       calc 
_refine_ls_weighting_details 
 'calc w=1/[\s^2^(Fo^2^)+(0.0357P)^2^+4.2756P] where P=(Fo^2^+2Fc^2^)/3' 
_atom_sites_solution_primary      direct 
_atom_sites_solution_secondary    difmap 
_atom_sites_solution_hydrogens    geom 
_refine_ls_hydrogen_treatment     constr 
_refine_ls_extinction_method      none 
_refine_ls_extinction_coef        ? 
_refine_ls_number_reflns          7550 
_refine_ls_number_parameters      559 
_refine_ls_number_restraints      0 
_refine_ls_R_factor_all           0.1189 
_refine_ls_R_factor_gt            0.0594 
_refine_ls_wR_factor_ref          0.1181 
_refine_ls_wR_factor_gt           0.1015 
_refine_ls_goodness_of_fit_ref    1.035 
_refine_ls_restrained_S_all       1.035 
_refine_ls_shift/su_max           0.000 
_refine_ls_shift/su_mean          0.000 
  
loop_ 
 _atom_site_label 
 _atom_site_type_symbol 
 _atom_site_fract_x 
 _atom_site_fract_y 
 _atom_site_fract_z 
 _atom_site_U_iso_or_equiv 
 _atom_site_adp_type 
 _atom_site_occupancy 
 _atom_site_symmetry_multiplicity 
 _atom_site_calc_flag 
 _atom_site_refinement_flags 
 _atom_site_disorder_assembly 
 _atom_site_disorder_group 
Co1 Co 0.86921(7) 0.38448(3) 0.77287(5) 0.0196(2) Uani 1 1 d . . . 
Br1 Br 1.04097(6) 0.42285(2) 0.64030(4) 0.02900(18) Uani 1 1 d . . . 
Br2 Br 0.71404(7) 0.52559(2) 0.87448(5) 0.0364(2) Uani 1 1 d . . . 
O1 O 0.8521(4) 0.44437(13) 0.8029(3) 0.0254(10) Uani 1 1 d . . . 
N1 N 0.7541(4) 0.35760(16) 0.6642(3) 0.0193(11) Uani 1 1 d . . . 
N2 N 0.7345(4) 0.31354(15) 0.6778(3) 0.0183(11) Uani 1 1 d . . . 
N3 N 0.7492(4) 0.35940(15) 0.8812(3) 0.0198(11) Uani 1 1 d . . . 
N4 N 0.7055(4) 0.31794(15) 0.8599(3) 0.0193(11) Uani 1 1 d . . . 
N5 N 0.9874(4) 0.33022(15) 0.7914(3) 0.0206(11) Uani 1 1 d . . . 
N6 N 0.9171(4) 0.29197(15) 0.7944(3) 0.0187(11) Uani 1 1 d . . . 
B1 B 0.7680(6) 0.2917(2) 0.7763(4) 0.0201(15) Uani 1 1 d . . . 
H1 H 0.7348 0.2609 0.7764 0.024 Uiso 1 1 calc R . . 
C1 C 0.6965(5) 0.3680(2) 0.5779(4) 0.0216(14) Uani 1 1 d . . . 
C2 C 0.6416(5) 0.3310(2) 0.5355(4) 0.0250(15) Uani 1 1 d . . . 
H2 H 0.5953 0.3294 0.4746 0.030 Uiso 1 1 calc R . . 
C3 C 0.6673(5) 0.2969(2) 0.5991(4) 0.0206(14) Uani 1 1 d . . . 
C4 C 0.6900(5) 0.37216(19) 0.9631(4) 0.0198(13) Uani 1 1 d . . . 
C5 C 0.6071(5) 0.3391(2) 0.9930(4) 0.0246(14) Uani 1 1 d . . . 
H5 H 0.5524 0.3399 1.0482 0.029 Uiso 1 1 calc R . . 
C6 C 0.6187(5) 0.30529(19) 0.9284(4) 0.0202(13) Uani 1 1 d . . . 
C7 C 1.1146(5) 0.3195(2) 0.7984(4) 0.0207(14) Uani 1 1 d . . . 
C8 C 1.1269(6) 0.2744(2) 0.8060(4) 0.0239(14) Uani 1 1 d . . . 
H8 H 1.2060 0.2581 0.8115 0.029 Uiso 1 1 calc R . . 
C9 C 1.0009(5) 0.25761(19) 0.8041(4) 0.0193(13) Uani 1 1 d . . . 
C10 C 0.6902(5) 0.4131(2) 0.5411(4) 0.0257(15) Uani 1 1 d . . . 
C11 C 0.6710(6) 0.4487(2) 0.6020(5) 0.0298(16) Uani 1 1 d . . . 
H11 H 0.6652 0.4441 0.6705 0.036 Uiso 1 1 calc R . . 
C12 C 0.6600(6) 0.4909(2) 0.5650(5) 0.0353(17) Uani 1 1 d . . . 
H12 H 0.6508 0.5150 0.6082 0.042 Uiso 1 1 calc R . . 
C13 C 0.6624(6) 0.4977(3) 0.4662(5) 0.0411(18) Uani 1 1 d . . . 
H13 H 0.6520 0.5264 0.4405 0.049 Uiso 1 1 calc R . . 
C14 C 0.6799(6) 0.4630(2) 0.4042(5) 0.0401(19) Uani 1 1 d . . . 
H14 H 0.6825 0.4680 0.3357 0.048 Uiso 1 1 calc R . . 
C15 C 0.6937(6) 0.4208(2) 0.4402(4) 0.0309(15) Uani 1 1 d . . . 
H15 H 0.7056 0.3970 0.3964 0.037 Uiso 1 1 calc R . . 
C16 C 0.6338(6) 0.2503(2) 0.5916(4) 0.0245(14) Uani 1 1 d . . . 
C17 C 0.7260(6) 0.2181(2) 0.6042(4) 0.0302(16) Uani 1 1 d . . . 
H17 H 0.8150 0.2262 0.6145 0.036 Uiso 1 1 calc R . . 
C18 C 0.6933(7) 0.1744(2) 0.6023(5) 0.0401(18) Uani 1 1 d . . . 
H18 H 0.7589 0.1527 0.6118 0.048 Uiso 1 1 calc R . . 
C19 C 0.5642(8) 0.1622(2) 0.5865(5) 0.045(2) Uani 1 1 d . . . 
H19 H 0.5400 0.1322 0.5873 0.054 Uiso 1 1 calc R . . 
C20 C 0.4727(7) 0.1937(3) 0.5699(5) 0.0396(18) Uani 1 1 d . . . 
H20 H 0.3849 0.1853 0.5561 0.048 Uiso 1 1 calc R . . 
C21 C 0.5042(6) 0.2378(2) 0.5727(4) 0.0327(16) Uani 1 1 d . . . 
H21 H 0.4385 0.2594 0.5619 0.039 Uiso 1 1 calc R . . 
C22 C 0.7225(6) 0.41297(19) 1.0144(4) 0.0229(14) Uani 1 1 d . . . 
C23 C 0.6281(6) 0.4347(2) 1.0674(4) 0.0264(15) Uani 1 1 d . . . 
H23 H 0.5402 0.4247 1.0641 0.032 Uiso 1 1 calc R . . 
C24 C 0.6601(6) 0.4707(2) 1.1250(4) 0.0301(15) Uani 1 1 d . . . 
H24 H 0.5946 0.4854 1.1606 0.036 Uiso 1 1 calc R . . 
C25 C 0.7893(6) 0.4853(2) 1.1301(5) 0.0309(16) Uani 1 1 d . . . 
H25 H 0.8129 0.5095 1.1707 0.037 Uiso 1 1 calc R . . 
C26 C 0.8814(6) 0.4645(2) 1.0763(4) 0.0299(16) Uani 1 1 d . . . 
H26 H 0.9690 0.4749 1.0785 0.036 Uiso 1 1 calc R . . 
C27 C 0.8495(6) 0.4288(2) 1.0188(4) 0.0262(15) Uani 1 1 d . . . 
H27 H 0.9152 0.4149 0.9819 0.031 Uiso 1 1 calc R . . 
C28 C 0.5591(5) 0.2614(2) 0.9325(4) 0.0245(14) Uani 1 1 d . . . 
C29 C 0.5007(6) 0.2416(2) 0.8509(5) 0.0299(16) Uani 1 1 d . . . 
H29 H 0.4956 0.2568 0.7903 0.036 Uiso 1 1 calc R . . 
C30 C 0.4495(6) 0.1994(2) 0.8581(5) 0.0325(16) Uani 1 1 d . . . 
H30 H 0.4111 0.1858 0.8019 0.039 Uiso 1 1 calc R . . 
C31 C 0.4542(6) 0.1773(2) 0.9458(5) 0.0328(17) Uani 1 1 d . . . 
H31 H 0.4181 0.1487 0.9503 0.039 Uiso 1 1 calc R . . 
C32 C 0.5110(6) 0.1967(2) 1.0269(5) 0.0324(16) Uani 1 1 d . . . 
H32 H 0.5152 0.1815 1.0876 0.039 Uiso 1 1 calc R . . 
C33 C 0.5624(6) 0.2387(2) 1.0195(4) 0.0269(15) Uani 1 1 d . . . 
H33 H 0.6008 0.2521 1.0759 0.032 Uiso 1 1 calc R . . 
C34 C 1.2222(6) 0.3518(2) 0.8014(4) 0.0232(14) Uani 1 1 d . . . 
C35 C 1.2264(6) 0.3852(2) 0.8695(4) 0.0277(15) Uani 1 1 d . . . 
H35 H 1.1554 0.3891 0.9121 0.033 Uiso 1 1 calc R . . 
C36 C 1.3327(6) 0.4132(2) 0.8764(4) 0.0312(16) Uani 1 1 d . . . 
H36 H 1.3356 0.4360 0.9237 0.037 Uiso 1 1 calc R . . 
C37 C 1.4344(6) 0.4072(2) 0.8134(5) 0.0336(16) Uani 1 1 d . . . 
H37 H 1.5082 0.4261 0.8168 0.040 Uiso 1 1 calc R . . 
C38 C 1.4290(6) 0.3743(2) 0.7462(5) 0.0378(18) Uani 1 1 d . . . 
H38 H 1.4992 0.3707 0.7028 0.045 Uiso 1 1 calc R . . 
C39 C 1.3247(6) 0.3463(2) 0.7399(5) 0.0323(16) Uani 1 1 d . . . 
H39 H 1.3234 0.3233 0.6933 0.039 Uiso 1 1 calc R . . 
C40 C 0.9623(5) 0.21111(19) 0.8109(4) 0.0225(14) Uani 1 1 d . . . 
C41 C 1.0357(6) 0.1798(2) 0.7621(4) 0.0263(15) Uani 1 1 d . . . 
H41 H 1.1056 0.1889 0.7224 0.032 Uiso 1 1 calc R . . 
C42 C 1.0081(7) 0.1360(2) 0.7709(5) 0.0373(17) Uani 1 1 d . . . 
H42A H 1.0596 0.1152 0.7377 0.045 Uiso 1 1 calc R . . 
C43 C 0.9061(6) 0.1219(2) 0.8277(5) 0.0366(17) Uani 1 1 d . . . 
H43A H 0.8862 0.0916 0.8328 0.044 Uiso 1 1 calc R . . 
C44 C 0.8338(6) 0.1527(2) 0.8767(5) 0.0354(17) Uani 1 1 d . . . 
H44A H 0.7639 0.1435 0.9164 0.042 Uiso 1 1 calc R . . 
C45 C 0.8622(6) 0.1970(2) 0.8686(4) 0.0284(15) Uani 1 1 d . . . 
H45 H 0.8121 0.2179 0.9032 0.034 Uiso 1 1 calc R . . 
C46 C 0.8877(6) 0.4796(2) 0.7542(4) 0.0253(15) Uani 1 1 d . . . 
C47 C 0.9742(6) 0.4787(2) 0.6754(4) 0.0281(15) Uani 1 1 d . . . 
C48 C 1.0098(6) 0.5149(2) 0.6238(5) 0.0324(16) Uani 1 1 d . . . 
H48 H 1.0674 0.5123 0.5707 0.039 Uiso 1 1 calc R . . 
C49 C 0.9605(6) 0.5559(2) 0.6499(5) 0.0338(17) Uani 1 1 d . . . 
H49 H 0.9851 0.5815 0.6153 0.041 Uiso 1 1 calc R . . 
C50 C 0.8754(6) 0.5588(2) 0.7269(4) 0.0293(15) Uani 1 1 d . . . 
H50 H 0.8422 0.5864 0.7464 0.035 Uiso 1 1 calc R . . 
C51 C 0.8389(6) 0.5210(2) 0.7753(4) 0.0262(15) Uani 1 1 d . . . 
  
loop_ 
 _atom_site_aniso_label 
 _atom_site_aniso_U_11 
 _atom_site_aniso_U_22 
 _atom_site_aniso_U_33 
 _atom_site_aniso_U_23 
 _atom_site_aniso_U_13 
 _atom_site_aniso_U_12 
Co1 0.0141(4) 0.0243(5) 0.0204(4) 0.0002(4) -0.0001(3) -0.0011(4) 
Br1 0.0237(3) 0.0335(4) 0.0300(4) 0.0016(3) 0.0061(3) 0.0014(3) 
Br2 0.0399(4) 0.0378(4) 0.0317(4) 0.0003(3) 0.0063(3) 0.0123(3) 
O1 0.028(2) 0.025(3) 0.023(2) 0.0015(19) 0.0035(18) 0.000(2) 
N1 0.009(2) 0.029(3) 0.020(3) -0.002(2) 0.003(2) -0.003(2) 
N2 0.014(2) 0.022(3) 0.018(3) -0.001(2) 0.001(2) -0.005(2) 
N3 0.017(3) 0.019(3) 0.023(3) 0.001(2) -0.003(2) -0.004(2) 
N4 0.019(3) 0.019(3) 0.020(3) -0.001(2) 0.000(2) -0.003(2) 
N5 0.015(3) 0.024(3) 0.022(3) -0.002(2) 0.000(2) -0.005(2) 
N6 0.015(3) 0.024(3) 0.017(3) -0.001(2) -0.002(2) 0.000(2) 
B1 0.022(4) 0.022(4) 0.017(3) -0.002(3) 0.004(3) 0.001(3) 
C1 0.017(3) 0.034(4) 0.014(3) -0.003(3) 0.002(2) -0.002(3) 
C2 0.019(3) 0.040(4) 0.016(3) 0.003(3) 0.000(3) -0.003(3) 
C3 0.010(3) 0.031(4) 0.021(3) -0.006(3) 0.000(2) 0.005(3) 
C4 0.019(3) 0.026(4) 0.015(3) 0.000(3) -0.003(2) 0.005(3) 
C5 0.016(3) 0.033(4) 0.025(3) 0.006(3) 0.002(3) -0.003(3) 
C6 0.016(3) 0.021(4) 0.023(3) 0.006(3) -0.001(3) -0.001(3) 
C7 0.008(3) 0.030(4) 0.023(3) -0.004(3) -0.003(2) 0.002(3) 
C8 0.019(3) 0.026(4) 0.028(3) -0.004(3) 0.001(3) 0.007(3) 
C9 0.022(3) 0.021(4) 0.015(3) 0.001(3) -0.002(2) -0.001(3) 
C10 0.010(3) 0.038(4) 0.028(3) 0.005(3) -0.006(3) -0.005(3) 
C11 0.018(3) 0.032(4) 0.039(4) 0.002(3) -0.009(3) 0.002(3) 
C12 0.012(3) 0.036(4) 0.058(5) 0.001(4) -0.014(3) 0.000(3) 
C13 0.019(4) 0.045(5) 0.058(5) 0.020(4) -0.009(3) -0.004(3) 
C14 0.023(4) 0.055(5) 0.042(4) 0.020(4) -0.007(3) -0.008(4) 
C15 0.026(4) 0.042(4) 0.025(3) 0.007(3) -0.007(3) -0.005(3) 
C16 0.032(4) 0.030(4) 0.012(3) 0.003(3) 0.000(3) -0.008(3) 
C17 0.028(4) 0.032(4) 0.031(4) -0.009(3) 0.001(3) -0.008(3) 
C18 0.051(5) 0.035(5) 0.035(4) -0.010(3) -0.002(3) -0.009(4) 
C19 0.058(5) 0.039(5) 0.037(4) -0.011(3) -0.002(4) -0.019(4) 
C20 0.034(4) 0.053(5) 0.032(4) 0.003(4) -0.006(3) -0.011(4) 
C21 0.023(4) 0.041(5) 0.033(4) 0.003(3) -0.008(3) -0.010(3) 
C22 0.022(3) 0.030(4) 0.016(3) 0.005(3) -0.001(2) 0.004(3) 
C23 0.023(3) 0.030(4) 0.027(3) 0.003(3) -0.002(3) -0.004(3) 
C24 0.032(4) 0.028(4) 0.030(4) 0.001(3) 0.002(3) 0.005(3) 
C25 0.032(4) 0.028(4) 0.032(4) -0.004(3) -0.009(3) 0.008(3) 
C26 0.031(4) 0.031(4) 0.027(3) 0.005(3) -0.014(3) -0.005(3) 
C27 0.024(3) 0.036(4) 0.019(3) 0.006(3) 0.001(3) 0.003(3) 
C28 0.019(3) 0.027(4) 0.027(3) -0.002(3) 0.005(3) 0.002(3) 
C29 0.019(3) 0.037(4) 0.035(4) 0.004(3) 0.005(3) -0.003(3) 
C30 0.019(3) 0.032(4) 0.046(4) -0.013(3) 0.001(3) -0.005(3) 
C31 0.025(4) 0.027(4) 0.048(5) -0.004(3) 0.021(3) -0.006(3) 
C32 0.031(4) 0.036(4) 0.031(4) 0.006(3) 0.014(3) 0.000(3) 
C33 0.025(4) 0.033(4) 0.024(3) 0.003(3) 0.010(3) -0.003(3) 
C34 0.021(3) 0.024(4) 0.024(3) 0.002(3) -0.004(3) -0.001(3) 
C35 0.023(3) 0.034(4) 0.026(3) 0.002(3) 0.001(3) 0.002(3) 
C36 0.027(4) 0.035(4) 0.031(4) 0.001(3) -0.001(3) -0.002(3) 
C37 0.013(3) 0.033(4) 0.054(4) 0.004(3) -0.008(3) -0.004(3) 
C38 0.015(4) 0.050(5) 0.048(4) 0.000(4) 0.011(3) -0.002(3) 
C39 0.030(4) 0.033(4) 0.034(4) -0.012(3) 0.012(3) -0.002(3) 
C40 0.018(3) 0.026(4) 0.023(3) 0.000(3) -0.008(3) -0.001(3) 
C41 0.026(4) 0.030(4) 0.023(3) 0.000(3) -0.005(3) 0.005(3) 
C42 0.039(4) 0.039(5) 0.034(4) -0.007(3) -0.012(3) 0.013(4) 
C43 0.030(4) 0.024(4) 0.055(5) 0.004(3) -0.018(3) -0.004(3) 
C44 0.026(4) 0.034(4) 0.046(4) 0.010(3) -0.011(3) -0.002(3) 
C45 0.017(3) 0.037(4) 0.032(4) 0.004(3) -0.004(3) 0.004(3) 
C46 0.024(3) 0.029(4) 0.022(3) 0.001(3) -0.012(3) -0.003(3) 
C47 0.017(3) 0.029(4) 0.038(4) -0.001(3) -0.007(3) 0.001(3) 
C48 0.023(4) 0.041(5) 0.033(4) 0.000(3) 0.000(3) -0.005(3) 
C49 0.028(4) 0.036(4) 0.037(4) 0.014(3) -0.003(3) -0.013(3) 
C50 0.035(4) 0.017(4) 0.035(4) 0.002(3) -0.010(3) 0.001(3) 
C51 0.024(4) 0.029(4) 0.025(3) -0.001(3) -0.003(3) 0.004(3) 
  
_geom_special_details 
; 
 All esds (except the esd in the dihedral angle between two l.s. planes) 
 are estimated using the full covariance matrix.  The cell esds are taken 
 into account individually in the estimation of esds in distances, angles 
 and torsion angles; correlations between esds in cell parameters are only 
 used when they are defined by crystal symmetry.  An approximate (isotropic) 
 treatment of cell esds is used for estimating esds involving l.s. planes. 
; 
  
loop_ 
 _geom_bond_atom_site_label_1 
 _geom_bond_atom_site_label_2 
 _geom_bond_distance 
 _geom_bond_site_symmetry_2 
 _geom_bond_publ_flag 
Co1 O1 1.882(4) . ? 
Co1 N1 2.045(4) . ? 
Co1 N5 2.062(5) . ? 
Co1 N3 2.092(5) . ? 
Co1 Br1 2.8105(10) . ? 
Br1 C47 1.902(6) . ? 
Br2 C51 1.890(6) . ? 
O1 C46 1.320(7) . ? 
N1 C1 1.345(7) . ? 
N1 N2 1.373(6) . ? 
N2 C3 1.362(7) . ? 
N2 B1 1.534(8) . ? 
N3 C4 1.343(7) . ? 
N3 N4 1.371(6) . ? 
N4 C6 1.362(7) . ? 
N4 B1 1.545(8) . ? 
N5 C7 1.343(7) . ? 
N5 N6 1.372(6) . ? 
N6 C9 1.359(7) . ? 
N6 B1 1.540(8) . ? 
B1 H1 1.0000 . ? 
C1 C2 1.382(8) . ? 
C1 C10 1.466(8) . ? 
C2 C3 1.378(8) . ? 
C2 H2 0.9500 . ? 
C3 C16 1.466(8) . ? 
C4 C5 1.386(8) . ? 
C4 C22 1.463(8) . ? 
C5 C6 1.366(8) . ? 
C5 H5 0.9500 . ? 
C6 C28 1.474(8) . ? 
C7 C8 1.386(8) . ? 
C7 C34 1.477(8) . ? 
C8 C9 1.387(8) . ? 
C8 H8 0.9500 . ? 
C9 C40 1.476(8) . ? 
C10 C11 1.387(8) . ? 
C10 C15 1.401(8) . ? 
C11 C12 1.387(9) . ? 
C11 H11 0.9500 . ? 
C12 C13 1.368(9) . ? 
C12 H12 0.9500 . ? 
C13 C14 1.369(9) . ? 
C13 H13 0.9500 . ? 
C14 C15 1.386(9) . ? 
C14 H14 0.9500 . ? 
C15 H15 0.9500 . ? 
C16 C17 1.369(8) . ? 
C16 C21 1.398(8) . ? 
C17 C18 1.374(9) . ? 
C17 H17 0.9500 . ? 
C18 C19 1.384(9) . ? 
C18 H18 0.9500 . ? 
C19 C20 1.358(10) . ? 
C19 H19 0.9500 . ? 
C20 C21 1.383(9) . ? 
C20 H20 0.9500 . ? 
C21 H21 0.9500 . ? 
C22 C27 1.387(8) . ? 
C22 C23 1.389(8) . ? 
C23 C24 1.387(8) . ? 
C23 H23 0.9500 . ? 
C24 C25 1.395(8) . ? 
C24 H24 0.9500 . ? 
C25 C26 1.366(8) . ? 
C25 H25 0.9500 . ? 
C26 C27 1.380(8) . ? 
C26 H26 0.9500 . ? 
C27 H27 0.9500 . ? 
C28 C33 1.376(8) . ? 
C28 C29 1.392(8) . ? 
C29 C30 1.393(8) . ? 
C29 H29 0.9500 . ? 
C30 C31 1.377(9) . ? 
C30 H30 0.9500 . ? 
C31 C32 1.374(9) . ? 
C31 H31 0.9500 . ? 
C32 C33 1.392(8) . ? 
C32 H32 0.9500 . ? 
C33 H33 0.9500 . ? 
C34 C39 1.370(8) . ? 
C34 C35 1.381(8) . ? 
C35 C36 1.384(8) . ? 
C35 H35 0.9500 . ? 
C36 C37 1.378(8) . ? 
C36 H36 0.9500 . ? 
C37 C38 1.361(9) . ? 
C37 H37 0.9500 . ? 
C38 C39 1.368(8) . ? 
C38 H38 0.9500 . ? 
C39 H39 0.9500 . ? 
C40 C45 1.377(8) . ? 
C40 C41 1.396(8) . ? 
C41 C42 1.370(9) . ? 
C41 H41 0.9500 . ? 
C42 C43 1.385(9) . ? 
C42 H42A 0.9500 . ? 
C43 C44 1.381(9) . ? 
C43 H43A 0.9500 . ? 
C44 C45 1.388(8) . ? 
C44 H44A 0.9500 . ? 
C45 H45 0.9500 . ? 
C46 C51 1.391(8) . ? 
C46 C47 1.411(8) . ? 
C47 C48 1.367(8) . ? 
C48 C49 1.398(9) . ? 
C48 H48 0.9500 . ? 
C49 C50 1.386(8) . ? 
C49 H49 0.9500 . ? 
C50 C51 1.384(8) . ? 
C50 H50 0.9500 . ? 
  
loop_ 
 _geom_angle_atom_site_label_1 
 _geom_angle_atom_site_label_2 
 _geom_angle_atom_site_label_3 
 _geom_angle 
 _geom_angle_site_symmetry_1 
 _geom_angle_site_symmetry_3 
 _geom_angle_publ_flag 
O1 Co1 N1 119.52(18) . . ? 
O1 Co1 N5 144.10(18) . . ? 
N1 Co1 N5 95.34(18) . . ? 
O1 Co1 N3 98.14(17) . . ? 
N1 Co1 N3 91.75(18) . . ? 
N5 Co1 N3 88.37(18) . . ? 
O1 Co1 Br1 78.39(12) . . ? 
N1 Co1 Br1 93.24(12) . . ? 
N5 Co1 Br1 92.28(13) . . ? 
N3 Co1 Br1 174.88(13) . . ? 
C47 Br1 Co1 88.64(19) . . ? 
C46 O1 Co1 130.8(4) . . ? 
C1 N1 N2 106.7(4) . . ? 
C1 N1 Co1 140.9(4) . . ? 
N2 N1 Co1 112.2(3) . . ? 
C3 N2 N1 109.4(4) . . ? 
C3 N2 B1 129.1(5) . . ? 
N1 N2 B1 120.9(4) . . ? 
C4 N3 N4 107.1(4) . . ? 
C4 N3 Co1 140.2(4) . . ? 
N4 N3 Co1 112.4(3) . . ? 
C6 N4 N3 109.2(4) . . ? 
C6 N4 B1 130.6(5) . . ? 
N3 N4 B1 119.7(4) . . ? 
C7 N5 N6 107.3(5) . . ? 
C7 N5 Co1 140.3(4) . . ? 
N6 N5 Co1 112.4(3) . . ? 
C9 N6 N5 109.2(4) . . ? 
C9 N6 B1 129.3(5) . . ? 
N5 N6 B1 121.1(5) . . ? 
N2 B1 N6 109.8(5) . . ? 
N2 B1 N4 109.7(5) . . ? 
N6 B1 N4 107.8(5) . . ? 
N2 B1 H1 109.8 . . ? 
N6 B1 H1 109.8 . . ? 
N4 B1 H1 109.8 . . ? 
N1 C1 C2 109.9(5) . . ? 
N1 C1 C10 122.5(5) . . ? 
C2 C1 C10 127.5(5) . . ? 
C3 C2 C1 106.5(5) . . ? 
C3 C2 H2 126.8 . . ? 
C1 C2 H2 126.8 . . ? 
N2 C3 C2 107.5(5) . . ? 
N2 C3 C16 122.0(5) . . ? 
C2 C3 C16 130.5(5) . . ? 
N3 C4 C5 109.1(5) . . ? 
N3 C4 C22 123.0(5) . . ? 
C5 C4 C22 127.7(5) . . ? 
C6 C5 C4 107.2(5) . . ? 
C6 C5 H5 126.4 . . ? 
C4 C5 H5 126.4 . . ? 
N4 C6 C5 107.4(5) . . ? 
N4 C6 C28 124.1(5) . . ? 
C5 C6 C28 128.3(5) . . ? 
N5 C7 C8 109.5(5) . . ? 
N5 C7 C34 124.0(5) . . ? 
C8 C7 C34 126.4(5) . . ? 
C7 C8 C9 106.3(5) . . ? 
C7 C8 H8 126.8 . . ? 
C9 C8 H8 126.8 . . ? 
N6 C9 C8 107.6(5) . . ? 
N6 C9 C40 125.3(5) . . ? 
C8 C9 C40 127.1(5) . . ? 
C11 C10 C15 117.8(6) . . ? 
C11 C10 C1 122.3(5) . . ? 
C15 C10 C1 119.7(6) . . ? 
C12 C11 C10 121.3(6) . . ? 
C12 C11 H11 119.3 . . ? 
C10 C11 H11 119.3 . . ? 
C13 C12 C11 119.9(7) . . ? 
C13 C12 H12 120.1 . . ? 
C11 C12 H12 120.1 . . ? 
C12 C13 C14 120.1(7) . . ? 
C12 C13 H13 120.0 . . ? 
C14 C13 H13 120.0 . . ? 
C13 C14 C15 120.7(7) . . ? 
C13 C14 H14 119.6 . . ? 
C15 C14 H14 119.6 . . ? 
C14 C15 C10 120.2(6) . . ? 
C14 C15 H15 119.9 . . ? 
C10 C15 H15 119.9 . . ? 
C17 C16 C21 118.5(6) . . ? 
C17 C16 C3 121.8(6) . . ? 
C21 C16 C3 119.7(6) . . ? 
C16 C17 C18 121.7(6) . . ? 
C16 C17 H17 119.2 . . ? 
C18 C17 H17 119.2 . . ? 
C17 C18 C19 119.7(7) . . ? 
C17 C18 H18 120.1 . . ? 
C19 C18 H18 120.1 . . ? 
C20 C19 C18 119.1(7) . . ? 
C20 C19 H19 120.4 . . ? 
C18 C19 H19 120.4 . . ? 
C19 C20 C21 121.7(7) . . ? 
C19 C20 H20 119.2 . . ? 
C21 C20 H20 119.2 . . ? 
C20 C21 C16 119.2(6) . . ? 
C20 C21 H21 120.4 . . ? 
C16 C21 H21 120.4 . . ? 
C27 C22 C23 118.3(6) . . ? 
C27 C22 C4 121.2(5) . . ? 
C23 C22 C4 120.3(5) . . ? 
C24 C23 C22 121.2(6) . . ? 
C24 C23 H23 119.4 . . ? 
C22 C23 H23 119.4 . . ? 
C23 C24 C25 119.5(6) . . ? 
C23 C24 H24 120.3 . . ? 
C25 C24 H24 120.3 . . ? 
C26 C25 C24 119.4(6) . . ? 
C26 C25 H25 120.3 . . ? 
C24 C25 H25 120.3 . . ? 
C25 C26 C27 121.1(6) . . ? 
C25 C26 H26 119.4 . . ? 
C27 C26 H26 119.4 . . ? 
C26 C27 C22 120.6(6) . . ? 
C26 C27 H27 119.7 . . ? 
C22 C27 H27 119.7 . . ? 
C33 C28 C29 118.4(6) . . ? 
C33 C28 C6 119.2(5) . . ? 
C29 C28 C6 122.4(5) . . ? 
C28 C29 C30 120.0(6) . . ? 
C28 C29 H29 120.0 . . ? 
C30 C29 H29 120.0 . . ? 
C31 C30 C29 120.6(6) . . ? 
C31 C30 H30 119.7 . . ? 
C29 C30 H30 119.7 . . ? 
C32 C31 C30 119.8(6) . . ? 
C32 C31 H31 120.1 . . ? 
C30 C31 H31 120.1 . . ? 
C31 C32 C33 119.4(6) . . ? 
C31 C32 H32 120.3 . . ? 
C33 C32 H32 120.3 . . ? 
C28 C33 C32 121.7(6) . . ? 
C28 C33 H33 119.1 . . ? 
C32 C33 H33 119.1 . . ? 
C39 C34 C35 119.4(6) . . ? 
C39 C34 C7 118.9(5) . . ? 
C35 C34 C7 121.5(5) . . ? 
C34 C35 C36 120.9(6) . . ? 
C34 C35 H35 119.5 . . ? 
C36 C35 H35 119.5 . . ? 
C37 C36 C35 118.7(6) . . ? 
C37 C36 H36 120.7 . . ? 
C35 C36 H36 120.7 . . ? 
C38 C37 C36 120.0(6) . . ? 
C38 C37 H37 120.0 . . ? 
C36 C37 H37 120.0 . . ? 
C37 C38 C39 121.5(6) . . ? 
C37 C38 H38 119.3 . . ? 
C39 C38 H38 119.3 . . ? 
C38 C39 C34 119.6(6) . . ? 
C38 C39 H39 120.2 . . ? 
C34 C39 H39 120.2 . . ? 
C45 C40 C41 118.5(6) . . ? 
C45 C40 C9 122.7(5) . . ? 
C41 C40 C9 118.7(5) . . ? 
C42 C41 C40 120.7(6) . . ? 
C42 C41 H41 119.6 . . ? 
C40 C41 H41 119.6 . . ? 
C41 C42 C43 120.9(6) . . ? 
C41 C42 H42A 119.6 . . ? 
C43 C42 H42A 119.6 . . ? 
C44 C43 C42 118.6(6) . . ? 
C44 C43 H43A 120.7 . . ? 
C42 C43 H43A 120.7 . . ? 
C43 C44 C45 120.7(6) . . ? 
C43 C44 H44A 119.7 . . ? 
C45 C44 H44A 119.7 . . ? 
C40 C45 C44 120.6(6) . . ? 
C40 C45 H45 119.7 . . ? 
C44 C45 H45 119.7 . . ? 
O1 C46 C51 122.1(5) . . ? 
O1 C46 C47 123.6(6) . . ? 
C51 C46 C47 114.3(6) . . ? 
C48 C47 C46 124.0(6) . . ? 
C48 C47 Br1 119.5(5) . . ? 
C46 C47 Br1 116.5(5) . . ? 
C47 C48 C49 119.3(6) . . ? 
C47 C48 H48 120.3 . . ? 
C49 C48 H48 120.3 . . ? 
C50 C49 C48 119.2(6) . . ? 
C50 C49 H49 120.4 . . ? 
C48 C49 H49 120.4 . . ? 
C51 C50 C49 119.6(6) . . ? 
C51 C50 H50 120.2 . . ? 
C49 C50 H50 120.2 . . ? 
C50 C51 C46 123.7(6) . . ? 
C50 C51 Br2 118.5(5) . . ? 
C46 C51 Br2 117.9(5) . . ? 
  
loop_ 
 _geom_torsion_atom_site_label_1 
 _geom_torsion_atom_site_label_2 
 _geom_torsion_atom_site_label_3 
 _geom_torsion_atom_site_label_4 
 _geom_torsion 
 _geom_torsion_site_symmetry_1 
 _geom_torsion_site_symmetry_2 
 _geom_torsion_site_symmetry_3 
 _geom_torsion_site_symmetry_4 
 _geom_torsion_publ_flag 
O1 Co1 Br1 C47 -9.6(2) . . . . ? 
N1 Co1 Br1 C47 109.9(2) . . . . ? 
N5 Co1 Br1 C47 -154.6(2) . . . . ? 
N3 Co1 Br1 C47 -57.3(15) . . . . ? 
N1 Co1 O1 C46 -72.3(5) . . . . ? 
N5 Co1 O1 C46 92.5(5) . . . . ? 
N3 Co1 O1 C46 -169.0(5) . . . . ? 
Br1 Co1 O1 C46 14.8(5) . . . . ? 
O1 Co1 N1 C1 32.9(6) . . . . ? 
N5 Co1 N1 C1 -138.2(6) . . . . ? 
N3 Co1 N1 C1 133.2(6) . . . . ? 
Br1 Co1 N1 C1 -45.6(6) . . . . ? 
O1 Co1 N1 N2 -153.5(3) . . . . ? 
N5 Co1 N1 N2 35.4(3) . . . . ? 
N3 Co1 N1 N2 -53.1(3) . . . . ? 
Br1 Co1 N1 N2 128.0(3) . . . . ? 
C1 N1 N2 C3 1.2(6) . . . . ? 
Co1 N1 N2 C3 -174.6(3) . . . . ? 
C1 N1 N2 B1 -170.1(5) . . . . ? 
Co1 N1 N2 B1 14.0(5) . . . . ? 
O1 Co1 N3 C4 -12.7(6) . . . . ? 
N1 Co1 N3 C4 -132.8(6) . . . . ? 
N5 Co1 N3 C4 131.9(6) . . . . ? 
Br1 Co1 N3 C4 34.4(19) . . . . ? 
O1 Co1 N3 N4 159.4(3) . . . . ? 
N1 Co1 N3 N4 39.2(4) . . . . ? 
N5 Co1 N3 N4 -56.1(4) . . . . ? 
Br1 Co1 N3 N4 -153.5(13) . . . . ? 
C4 N3 N4 C6 0.3(6) . . . . ? 
Co1 N3 N4 C6 -174.4(3) . . . . ? 
C4 N3 N4 B1 -172.7(5) . . . . ? 
Co1 N3 N4 B1 12.6(6) . . . . ? 
O1 Co1 N5 C7 -35.2(7) . . . . ? 
N1 Co1 N5 C7 131.6(6) . . . . ? 
N3 Co1 N5 C7 -136.8(6) . . . . ? 
Br1 Co1 N5 C7 38.1(6) . . . . ? 
O1 Co1 N5 N6 148.0(3) . . . . ? 
N1 Co1 N5 N6 -45.3(3) . . . . ? 
N3 Co1 N5 N6 46.3(3) . . . . ? 
Br1 Co1 N5 N6 -138.8(3) . . . . ? 
C7 N5 N6 C9 0.5(6) . . . . ? 
Co1 N5 N6 C9 178.4(3) . . . . ? 
C7 N5 N6 B1 -172.9(5) . . . . ? 
Co1 N5 N6 B1 4.9(6) . . . . ? 
C3 N2 B1 N6 122.7(6) . . . . ? 
N1 N2 B1 N6 -67.9(6) . . . . ? 
C3 N2 B1 N4 -119.0(6) . . . . ? 
N1 N2 B1 N4 50.4(6) . . . . ? 
C9 N6 B1 N2 -117.2(6) . . . . ? 
N5 N6 B1 N2 54.8(6) . . . . ? 
C9 N6 B1 N4 123.3(6) . . . . ? 
N5 N6 B1 N4 -64.7(6) . . . . ? 
C6 N4 B1 N2 121.4(6) . . . . ? 
N3 N4 B1 N2 -67.3(6) . . . . ? 
C6 N4 B1 N6 -119.1(6) . . . . ? 
N3 N4 B1 N6 52.2(6) . . . . ? 
N2 N1 C1 C2 -0.7(6) . . . . ? 
Co1 N1 C1 C2 173.2(4) . . . . ? 
N2 N1 C1 C10 176.2(5) . . . . ? 
Co1 N1 C1 C10 -9.9(9) . . . . ? 
N1 C1 C2 C3 0.0(6) . . . . ? 
C10 C1 C2 C3 -176.8(5) . . . . ? 
N1 N2 C3 C2 -1.2(6) . . . . ? 
B1 N2 C3 C2 169.2(5) . . . . ? 
N1 N2 C3 C16 178.8(5) . . . . ? 
B1 N2 C3 C16 -10.8(8) . . . . ? 
C1 C2 C3 N2 0.7(6) . . . . ? 
C1 C2 C3 C16 -179.3(6) . . . . ? 
N4 N3 C4 C5 -0.9(6) . . . . ? 
Co1 N3 C4 C5 171.4(4) . . . . ? 
N4 N3 C4 C22 173.4(5) . . . . ? 
Co1 N3 C4 C22 -14.2(9) . . . . ? 
N3 C4 C5 C6 1.2(6) . . . . ? 
C22 C4 C5 C6 -172.8(5) . . . . ? 
N3 N4 C6 C5 0.4(6) . . . . ? 
B1 N4 C6 C5 172.4(5) . . . . ? 
N3 N4 C6 C28 -175.5(5) . . . . ? 
B1 N4 C6 C28 -3.5(9) . . . . ? 
C4 C5 C6 N4 -1.0(6) . . . . ? 
C4 C5 C6 C28 174.7(6) . . . . ? 
N6 N5 C7 C8 -0.1(6) . . . . ? 
Co1 N5 C7 C8 -177.0(4) . . . . ? 
N6 N5 C7 C34 -177.8(5) . . . . ? 
Co1 N5 C7 C34 5.3(9) . . . . ? 
N5 C7 C8 C9 -0.4(6) . . . . ? 
C34 C7 C8 C9 177.2(5) . . . . ? 
N5 N6 C9 C8 -0.8(6) . . . . ? 
B1 N6 C9 C8 172.0(5) . . . . ? 
N5 N6 C9 C40 179.4(5) . . . . ? 
B1 N6 C9 C40 -7.8(9) . . . . ? 
C7 C8 C9 N6 0.7(6) . . . . ? 
C7 C8 C9 C40 -179.5(5) . . . . ? 
N1 C1 C10 C11 -37.6(8) . . . . ? 
C2 C1 C10 C11 138.8(6) . . . . ? 
N1 C1 C10 C15 147.4(5) . . . . ? 
C2 C1 C10 C15 -36.2(9) . . . . ? 
C15 C10 C11 C12 -2.2(9) . . . . ? 
C1 C10 C11 C12 -177.3(5) . . . . ? 
C10 C11 C12 C13 2.8(9) . . . . ? 
C11 C12 C13 C14 -2.1(9) . . . . ? 
C12 C13 C14 C15 0.8(10) . . . . ? 
C13 C14 C15 C10 -0.1(9) . . . . ? 
C11 C10 C15 C14 0.8(9) . . . . ? 
C1 C10 C15 C14 176.1(5) . . . . ? 
N2 C3 C16 C17 -51.9(8) . . . . ? 
C2 C3 C16 C17 128.2(7) . . . . ? 
N2 C3 C16 C21 127.1(6) . . . . ? 
C2 C3 C16 C21 -52.9(9) . . . . ? 
C21 C16 C17 C18 -2.5(9) . . . . ? 
C3 C16 C17 C18 176.5(5) . . . . ? 
C16 C17 C18 C19 0.5(10) . . . . ? 
C17 C18 C19 C20 2.2(10) . . . . ? 
C18 C19 C20 C21 -2.9(10) . . . . ? 
C19 C20 C21 C16 1.0(10) . . . . ? 
C17 C16 C21 C20 1.7(9) . . . . ? 
C3 C16 C21 C20 -177.3(5) . . . . ? 
N3 C4 C22 C27 -35.2(8) . . . . ? 
C5 C4 C22 C27 138.1(6) . . . . ? 
N3 C4 C22 C23 150.6(5) . . . . ? 
C5 C4 C22 C23 -36.1(9) . . . . ? 
C27 C22 C23 C24 -1.4(9) . . . . ? 
C4 C22 C23 C24 173.0(5) . . . . ? 
C22 C23 C24 C25 -0.2(9) . . . . ? 
C23 C24 C25 C26 1.7(9) . . . . ? 
C24 C25 C26 C27 -1.5(9) . . . . ? 
C25 C26 C27 C22 -0.1(9) . . . . ? 
C23 C22 C27 C26 1.5(8) . . . . ? 
C4 C22 C27 C26 -172.8(5) . . . . ? 
N4 C6 C28 C33 129.6(6) . . . . ? 
C5 C6 C28 C33 -45.4(9) . . . . ? 
N4 C6 C28 C29 -49.5(8) . . . . ? 
C5 C6 C28 C29 135.5(6) . . . . ? 
C33 C28 C29 C30 -1.2(9) . . . . ? 
C6 C28 C29 C30 177.9(5) . . . . ? 
C28 C29 C30 C31 1.1(9) . . . . ? 
C29 C30 C31 C32 -0.8(9) . . . . ? 
C30 C31 C32 C33 0.5(9) . . . . ? 
C29 C28 C33 C32 1.0(9) . . . . ? 
C6 C28 C33 C32 -178.1(5) . . . . ? 
C31 C32 C33 C28 -0.7(9) . . . . ? 
N5 C7 C34 C39 -130.4(6) . . . . ? 
C8 C7 C34 C39 52.3(9) . . . . ? 
N5 C7 C34 C35 54.5(8) . . . . ? 
C8 C7 C34 C35 -122.8(7) . . . . ? 
C39 C34 C35 C36 -0.1(9) . . . . ? 
C7 C34 C35 C36 174.9(6) . . . . ? 
C34 C35 C36 C37 0.5(9) . . . . ? 
C35 C36 C37 C38 -0.2(10) . . . . ? 
C36 C37 C38 C39 -0.6(10) . . . . ? 
C37 C38 C39 C34 1.0(10) . . . . ? 
C35 C34 C39 C38 -0.6(10) . . . . ? 
C7 C34 C39 C38 -175.8(6) . . . . ? 
N6 C9 C40 C45 -44.2(8) . . . . ? 
C8 C9 C40 C45 135.9(6) . . . . ? 
N6 C9 C40 C41 140.2(6) . . . . ? 
C8 C9 C40 C41 -39.6(8) . . . . ? 
C45 C40 C41 C42 0.5(9) . . . . ? 
C9 C40 C41 C42 176.2(5) . . . . ? 
C40 C41 C42 C43 0.6(9) . . . . ? 
C41 C42 C43 C44 -1.1(9) . . . . ? 
C42 C43 C44 C45 0.5(9) . . . . ? 
C41 C40 C45 C44 -1.0(9) . . . . ? 
C9 C40 C45 C44 -176.6(5) . . . . ? 
C43 C44 C45 C40 0.5(9) . . . . ? 
Co1 O1 C46 C51 163.7(4) . . . . ? 
Co1 O1 C46 C47 -14.3(8) . . . . ? 
O1 C46 C47 C48 178.9(6) . . . . ? 
C51 C46 C47 C48 0.7(9) . . . . ? 
O1 C46 C47 Br1 -0.2(8) . . . . ? 
C51 C46 C47 Br1 -178.4(4) . . . . ? 
Co1 Br1 C47 C48 -171.7(5) . . . . ? 
Co1 Br1 C47 C46 7.4(4) . . . . ? 
C46 C47 C48 C49 1.0(9) . . . . ? 
Br1 C47 C48 C49 -179.9(5) . . . . ? 
C47 C48 C49 C50 -0.8(9) . . . . ? 
C48 C49 C50 C51 -1.1(9) . . . . ? 
C49 C50 C51 C46 3.0(9) . . . . ? 
C49 C50 C51 Br2 -176.0(4) . . . . ? 
O1 C46 C51 C50 179.0(5) . . . . ? 
C47 C46 C51 C50 -2.8(9) . . . . ? 
O1 C46 C51 Br2 -1.9(8) . . . . ? 
C47 C46 C51 Br2 176.3(4) . . . . ? 
  
_diffrn_measured_fraction_theta_max    1.000 
_diffrn_reflns_theta_full              25.03 
_diffrn_measured_fraction_theta_full   1.000 
_refine_diff_density_max    0.521 
_refine_diff_density_min   -0.483 
_refine_diff_density_rms    0.104 

#===END

data_5 
  
_vrf_PLAT601_5 
; 
PROBLEM: _A Structure Contains Solvent Accessible VOIDS of .. 375 A**3 
RESPONSE: Highly disordered solvent located in a pocket at a 
crystallographic inversion center could not be modeled satisfactorily. 
Reflection contributions from this solvent were removed using program 
PLATON, function SQUEEZE (Spek, 2003), which determined there to be 
115 electrons in 375 \%A^3^ removed per unit cell. Because the exact 
identify and amount of this solvent could not be determined, no solvent 
was included in the atom list or in the molecular formula. Thus all 
calculated items that derive from the molecular formula (e.g., F(000), 
density, molecular weight, etc.) are known to be incorrect. 
; 
  
_audit_creation_method            SHELXL-97 
_chemical_name_systematic 
; 
 5 
; 
_chemical_name_common             holmb02 
_chemical_melting_point           ? 
_chemical_formula_moiety          'C51 H37 B Cl2 N6 Ni O' 
_chemical_formula_sum             'C51 H37 B Cl2 N6 Ni O' 
_chemical_formula_weight          890.29 
  
loop_ 
 _atom_type_symbol 
 _atom_type_description 
 _atom_type_scat_dispersion_real 
 _atom_type_scat_dispersion_imag 
 _atom_type_scat_source 
 'C'  'C'   0.0033   0.0016 
 'International Tables Vol C Tables 4.2.6.8 and 6.1.1.4' 
 'H'  'H'   0.0000   0.0000 
 'International Tables Vol C Tables 4.2.6.8 and 6.1.1.4' 
 'B'  'B'   0.0013   0.0007 
 'International Tables Vol C Tables 4.2.6.8 and 6.1.1.4' 
 'N'  'N'   0.0061   0.0033 
 'International Tables Vol C Tables 4.2.6.8 and 6.1.1.4' 
 'O'  'O'   0.0106   0.0060 
 'International Tables Vol C Tables 4.2.6.8 and 6.1.1.4' 
 'Cl'  'Cl'   0.1484   0.1585 
 'International Tables Vol C Tables 4.2.6.8 and 6.1.1.4' 
 'Ni'  'Ni'   0.3393   1.1124 
 'International Tables Vol C Tables 4.2.6.8 and 6.1.1.4' 
  
_symmetry_cell_setting            triclinic 
_symmetry_space_group_name_H-M    'P -1' 
  
loop_ 
 _symmetry_equiv_pos_as_xyz 
 'x, y, z' 
 '-x, -y, -z' 
  
_cell_length_a                    12.3898(11) 
_cell_length_b                    14.2664(13) 
_cell_length_c                    15.4042(13) 
_cell_angle_alpha                 63.969(2) 
_cell_angle_beta                  84.152(2) 
_cell_angle_gamma                 71.450(2) 
_cell_volume                      2317.2(4) 
_cell_formula_units_Z             2 
_cell_measurement_temperature     100.0(5) 
_cell_measurement_reflns_used     4021 
_cell_measurement_theta_min       2.23 
_cell_measurement_theta_max       29.96 
  
_exptl_crystal_description        block 
_exptl_crystal_colour             yellow-orange 
_exptl_crystal_size_max           0.20 
_exptl_crystal_size_mid           0.20 
_exptl_crystal_size_min           0.16 
_exptl_crystal_density_meas       ? 
_exptl_crystal_density_diffrn     1.276 
_exptl_crystal_density_method     'not measured' 
_exptl_crystal_F_000              920 
_exptl_absorpt_coefficient_mu     0.578 
_exptl_absorpt_correction_type    multi-scan 
_exptl_absorpt_correction_T_min   0.8932 
_exptl_absorpt_correction_T_max   0.9133 
_exptl_absorpt_process_details    'SADABS (Sheldrick, 2008)' 
  
_exptl_special_details 
; 
 ? 
; 
  
_diffrn_ambient_temperature       100.0(5) 
_diffrn_radiation_wavelength      0.71073 
_diffrn_radiation_type            MoK\a 
_diffrn_radiation_source          'fine-focus sealed tube' 
_diffrn_radiation_monochromator   graphite 
_diffrn_measurement_device_type   'Bruker SMART APEX II CCD Platform' 
_diffrn_measurement_method        'area detector, \w scans per \f' 
_diffrn_detector_area_resol_mean  ? 
_diffrn_standards_number          0 
_diffrn_standards_interval_count  ? 
_diffrn_standards_interval_time   ? 
_diffrn_standards_decay_%         ? 
_diffrn_reflns_number             48759 
_diffrn_reflns_av_R_equivalents   0.0670 
_diffrn_reflns_av_sigmaI/netI     0.0925 
_diffrn_reflns_limit_h_min        -19 
_diffrn_reflns_limit_h_max        19 
_diffrn_reflns_limit_k_min        -21 
_diffrn_reflns_limit_k_max        21 
_diffrn_reflns_limit_l_min        -23 
_diffrn_reflns_limit_l_max        23 
_diffrn_reflns_theta_min          1.67 
_diffrn_reflns_theta_max          33.14 
_reflns_number_total              17565 
_reflns_number_gt                 10080 
_reflns_threshold_expression      >2sigma(I) 
  
_computing_data_collection        'APEX2 (Bruker, 2011)' 
_computing_cell_refinement        'SAINT (Bruker, 2009)' 
_computing_data_reduction         'SAINT (Bruker, 2009)' 
_computing_structure_solution     'SIR97 (Altomare et al., 1999)' 
_computing_structure_refinement   'SHELXL-97 (Sheldrick, 2008)' 
_computing_molecular_graphics     'SHELXTL (Sheldrick, 2008)' 
_computing_publication_material   'SHELXTL (Sheldrick, 2008)' 
  
_refine_special_details 
; 
 Refinement of F^2^ against ALL reflections.  The weighted R-factor wR and 
 goodness of fit S are based on F^2^, conventional R-factors R are based 
 on F, with F set to zero for negative F^2^. The threshold expression of 
 F^2^ > 2sigma(F^2^) is used only for calculating R-factors(gt) etc. and is 
 not relevant to the choice of reflections for refinement.  R-factors based 
 on F^2^ are statistically about twice as large as those based on F, and R- 
 factors based on ALL data will be even larger. 
  
 Highly disordered solvent located in a pocket at a crystallographic 
 inversion center could not be modeled satisfactorily. Reflection 
 contributions from this solvent were removed using program PLATON, 
 function SQUEEZE (Spek, 2003), which determined there to be 115 electrons 
 in 375 \%A^3^ removed per unit cell. Because the exact identify and amount 
 of this solvent could not be determined, no solvent was included in the 
 atom list or in the molecular formula. Thus all calculated items that 
 derive from the molecular formula (e.g., F(000), density, molecular 
 weight, etc.) are known to be incorrect. 
; 
  
_refine_ls_structure_factor_coef  Fsqd 
_refine_ls_matrix_type            full 
_refine_ls_weighting_scheme       calc 
_refine_ls_weighting_details 
 'calc w=1/[\s^2^(Fo^2^)+(0.0564P)^2^+0.0000P] where P=(Fo^2^+2Fc^2^)/3' 
_atom_sites_solution_primary      direct 
_atom_sites_solution_secondary    difmap 
_atom_sites_solution_hydrogens    geom 
_refine_ls_hydrogen_treatment     constr 
_refine_ls_extinction_method      none 
_refine_ls_extinction_coef        ? 
_refine_ls_number_reflns          17565 
_refine_ls_number_parameters      559 
_refine_ls_number_restraints      0 
_refine_ls_R_factor_all           0.0970 
_refine_ls_R_factor_gt            0.0528 
_refine_ls_wR_factor_ref          0.1292 
_refine_ls_wR_factor_gt           0.1138 
_refine_ls_goodness_of_fit_ref    0.909 
_refine_ls_restrained_S_all       0.909 
_refine_ls_shift/su_max           0.001 
_refine_ls_shift/su_mean          0.000 
  
loop_ 
 _atom_site_label 
 _atom_site_type_symbol 
 _atom_site_fract_x 
 _atom_site_fract_y 
 _atom_site_fract_z 
 _atom_site_U_iso_or_equiv 
 _atom_site_adp_type 
 _atom_site_occupancy 
 _atom_site_symmetry_multiplicity 
 _atom_site_calc_flag 
 _atom_site_refinement_flags 
 _atom_site_disorder_assembly 
 _atom_site_disorder_group 
Ni1 Ni 0.68772(2) 0.835693(19) 0.835247(17) 0.02050(6) Uani 1 1 d . . . 
Cl1 Cl 0.66606(4) 1.03606(4) 0.79145(4) 0.03110(12) Uani 1 1 d . . . 
Cl2 Cl 0.79897(5) 0.90645(5) 0.50918(4) 0.03578(12) Uani 1 1 d . . . 
O1 O 0.72075(12) 0.88477(10) 0.70194(9) 0.0240(3) Uani 1 1 d . . . 
N1 N 0.82275(13) 0.76808(12) 0.93090(11) 0.0214(3) Uani 1 1 d . . . 
N2 N 0.81652(13) 0.67700(12) 1.01259(11) 0.0203(3) Uani 1 1 d . . . 
N3 N 0.68340(13) 0.68767(12) 0.85027(11) 0.0209(3) Uani 1 1 d . . . 
N4 N 0.70109(13) 0.60792(12) 0.94338(10) 0.0194(3) Uani 1 1 d . . . 
N5 N 0.57135(13) 0.82688(12) 0.93951(11) 0.0206(3) Uani 1 1 d . . . 
N6 N 0.60339(13) 0.73121(12) 1.02231(11) 0.0210(3) Uani 1 1 d . . . 
B1 B 0.71131(18) 0.63800(16) 1.02610(14) 0.0188(4) Uani 1 1 d . . . 
H1 H 0.7187 0.5726 1.0897 0.023 Uiso 1 1 calc R . . 
C1 C 0.92487(17) 0.77963(15) 0.93773(14) 0.0240(4) Uani 1 1 d . . . 
C2 C 0.98373(17) 0.69591(15) 1.02299(14) 0.0248(4) Uani 1 1 d . . . 
H2 H 1.0577 0.6847 1.0450 0.030 Uiso 1 1 calc R . . 
C3 C 0.91285(16) 0.63263(15) 1.06887(13) 0.0223(4) Uani 1 1 d . . . 
C4 C 0.66773(16) 0.64204(15) 0.79508(13) 0.0212(4) Uani 1 1 d . . . 
C5 C 0.67718(16) 0.53192(15) 0.85243(13) 0.0233(4) Uani 1 1 d . . . 
H5 H 0.6712 0.4804 0.8312 0.028 Uiso 1 1 calc R . . 
C6 C 0.69691(15) 0.51302(14) 0.94597(13) 0.0207(4) Uani 1 1 d . . . 
C7 C 0.47249(16) 0.88902(15) 0.95693(13) 0.0221(4) Uani 1 1 d . . . 
C8 C 0.44287(16) 0.83435(15) 1.05154(13) 0.0233(4) Uani 1 1 d . . . 
H8 H 0.3778 0.8604 1.0825 0.028 Uiso 1 1 calc R . . 
C9 C 0.52705(16) 0.73481(15) 1.09118(13) 0.0222(4) Uani 1 1 d . . . 
C10 C 0.96613(17) 0.86894(16) 0.86476(15) 0.0269(4) Uani 1 1 d . . . 
C11 C 1.0230(2) 0.91788(19) 0.89749(17) 0.0374(5) Uani 1 1 d . . . 
H11 H 1.0300 0.8973 0.9648 0.045 Uiso 1 1 calc R . . 
C12 C 1.0698(2) 0.9972(2) 0.83136(18) 0.0444(6) Uani 1 1 d . . . 
H12 H 1.1100 1.0298 0.8535 0.053 Uiso 1 1 calc R . . 
C13 C 1.0575(2) 1.02852(18) 0.73348(17) 0.0380(5) Uani 1 1 d . . . 
H13 H 1.0888 1.0832 0.6885 0.046 Uiso 1 1 calc R . . 
C14 C 1.00020(18) 0.98093(17) 0.70070(16) 0.0309(4) Uani 1 1 d . . . 
H14 H 0.9912 1.0032 0.6333 0.037 Uiso 1 1 calc R . . 
C15 C 0.95579(16) 0.90024(16) 0.76692(14) 0.0259(4) Uani 1 1 d . . . 
H15 H 0.9178 0.8662 0.7445 0.031 Uiso 1 1 calc R . . 
C16 C 0.93299(16) 0.53440(15) 1.16277(14) 0.0216(4) Uani 1 1 d . . . 
C17 C 0.85528(17) 0.52959(16) 1.23618(14) 0.0260(4) Uani 1 1 d . . . 
H17 H 0.7883 0.5896 1.2260 0.031 Uiso 1 1 calc R . . 
C18 C 0.87639(18) 0.43713(17) 1.32357(15) 0.0323(5) Uani 1 1 d . . . 
H18 H 0.8236 0.4338 1.3733 0.039 Uiso 1 1 calc R . . 
C19 C 0.97364(19) 0.34963(17) 1.33913(16) 0.0344(5) Uani 1 1 d . . . 
H19 H 0.9869 0.2861 1.3990 0.041 Uiso 1 1 calc R . . 
C20 C 1.05203(18) 0.35423(17) 1.26758(15) 0.0297(4) Uani 1 1 d . . . 
H20 H 1.1197 0.2946 1.2787 0.036 Uiso 1 1 calc R . . 
C21 C 1.03093(17) 0.44669(16) 1.17948(15) 0.0267(4) Uani 1 1 d . . . 
H21 H 1.0843 0.4498 1.1302 0.032 Uiso 1 1 calc R . . 
C22 C 0.63502(18) 0.70156(17) 0.69114(14) 0.0265(4) Uani 1 1 d . . . 
C23 C 0.54943(19) 0.80134(18) 0.65510(15) 0.0324(5) Uani 1 1 d . . . 
H23 H 0.5181 0.8361 0.6963 0.039 Uiso 1 1 calc R . . 
C24 C 0.5091(2) 0.8509(2) 0.55966(18) 0.0464(6) Uani 1 1 d . . . 
H24 H 0.4509 0.9195 0.5356 0.056 Uiso 1 1 calc R . . 
C25 C 0.5534(2) 0.8007(3) 0.49993(17) 0.0509(7) Uani 1 1 d . . . 
H25 H 0.5239 0.8333 0.4352 0.061 Uiso 1 1 calc R . . 
C26 C 0.6405(2) 0.7033(3) 0.53358(17) 0.0490(7) Uani 1 1 d . . . 
H26 H 0.6729 0.6702 0.4914 0.059 Uiso 1 1 calc R . . 
C27 C 0.6811(2) 0.6533(2) 0.62929(15) 0.0361(5) Uani 1 1 d . . . 
H27 H 0.7407 0.5856 0.6524 0.043 Uiso 1 1 calc R . . 
C28 C 0.70367(16) 0.41351(14) 1.03613(13) 0.0211(4) Uani 1 1 d . . . 
C29 C 0.78527(16) 0.37144(15) 1.11038(14) 0.0230(4) Uani 1 1 d . . . 
H29 H 0.8425 0.4054 1.1030 0.028 Uiso 1 1 calc R . . 
C30 C 0.78326(17) 0.28018(15) 1.19503(14) 0.0265(4) Uani 1 1 d . . . 
H30 H 0.8382 0.2526 1.2460 0.032 Uiso 1 1 calc R . . 
C31 C 0.70176(18) 0.22913(16) 1.20559(15) 0.0296(4) Uani 1 1 d . . . 
H31 H 0.7006 0.1667 1.2639 0.035 Uiso 1 1 calc R . . 
C32 C 0.62202(18) 0.26853(17) 1.13175(15) 0.0299(4) Uani 1 1 d . . . 
H32 H 0.5669 0.2325 1.1387 0.036 Uiso 1 1 calc R . . 
C33 C 0.62226(17) 0.36064(15) 1.04738(14) 0.0256(4) Uani 1 1 d . . . 
H33 H 0.5667 0.3880 0.9969 0.031 Uiso 1 1 calc R . . 
C34 C 0.40153(16) 0.99356(15) 0.88331(13) 0.0223(4) Uani 1 1 d . . . 
C35 C 0.39558(18) 1.01329(16) 0.78718(14) 0.0273(4) Uani 1 1 d . . . 
H35 H 0.4441 0.9613 0.7662 0.033 Uiso 1 1 calc R . . 
C36 C 0.31941(18) 1.10825(16) 0.72100(15) 0.0302(4) Uani 1 1 d . . . 
H36 H 0.3155 1.1206 0.6554 0.036 Uiso 1 1 calc R . . 
C37 C 0.24910(18) 1.18499(17) 0.75109(16) 0.0322(5) Uani 1 1 d . . . 
H37 H 0.1973 1.2502 0.7061 0.039 Uiso 1 1 calc R . . 
C38 C 0.25480(18) 1.16610(16) 0.84669(16) 0.0307(4) Uani 1 1 d . . . 
H38 H 0.2065 1.2184 0.8674 0.037 Uiso 1 1 calc R . . 
C39 C 0.33039(17) 1.07165(16) 0.91237(15) 0.0253(4) Uani 1 1 d . . . 
H39 H 0.3340 1.0597 0.9779 0.030 Uiso 1 1 calc R . . 
C40 C 0.53879(16) 0.64713(15) 1.19036(13) 0.0219(4) Uani 1 1 d . . . 
C41 C 0.54920(16) 0.53937(16) 1.21054(14) 0.0239(4) Uani 1 1 d . . . 
H41 H 0.5498 0.5198 1.1590 0.029 Uiso 1 1 calc R . . 
C42 C 0.55871(18) 0.46061(17) 1.30525(15) 0.0291(4) Uani 1 1 d . . . 
H42 H 0.5651 0.3874 1.3185 0.035 Uiso 1 1 calc R . . 
C43 C 0.55890(18) 0.48875(18) 1.38069(14) 0.0319(5) Uani 1 1 d . . . 
H43 H 0.5668 0.4345 1.4457 0.038 Uiso 1 1 calc R . . 
C44 C 0.54763(19) 0.59552(18) 1.36147(15) 0.0329(5) Uani 1 1 d . . . 
H44 H 0.5469 0.6145 1.4134 0.040 Uiso 1 1 calc R . . 
C45 C 0.53742(17) 0.67480(17) 1.26748(14) 0.0275(4) Uani 1 1 d . . . 
H45 H 0.5295 0.7481 1.2549 0.033 Uiso 1 1 calc R . . 
C46 C 0.72936(16) 0.98201(15) 0.64435(14) 0.0245(4) Uani 1 1 d . . . 
C47 C 0.70597(17) 1.06767(16) 0.67206(15) 0.0282(4) Uani 1 1 d . . . 
C48 C 0.71635(19) 1.17047(17) 0.61327(17) 0.0369(5) Uani 1 1 d . . . 
H48 H 0.6981 1.2257 0.6357 0.044 Uiso 1 1 calc R . . 
C49 C 0.7539(2) 1.19047(18) 0.52132(18) 0.0423(6) Uani 1 1 d . . . 
H49 H 0.7621 1.2602 0.4797 0.051 Uiso 1 1 calc R . . 
C50 C 0.77973(19) 1.10918(19) 0.48939(16) 0.0368(5) Uani 1 1 d . . . 
H50 H 0.8058 1.1231 0.4260 0.044 Uiso 1 1 calc R . . 
C51 C 0.76755(17) 1.00798(17) 0.54990(14) 0.0289(4) Uani 1 1 d . . . 
  
loop_ 
 _atom_site_aniso_label 
 _atom_site_aniso_U_11 
 _atom_site_aniso_U_22 
 _atom_site_aniso_U_33 
 _atom_site_aniso_U_23 
 _atom_site_aniso_U_13 
 _atom_site_aniso_U_12 
Ni1 0.02111(13) 0.01774(11) 0.01870(12) -0.00580(9) 0.00481(9) -0.00512(9) 
Cl1 0.0339(3) 0.0220(2) 0.0354(3) -0.0131(2) 0.0129(2) -0.0085(2) 
Cl2 0.0376(3) 0.0453(3) 0.0210(2) -0.0117(2) 0.0060(2) -0.0135(2) 
O1 0.0268(7) 0.0214(6) 0.0204(7) -0.0064(5) 0.0048(5) -0.0079(6) 
N1 0.0236(8) 0.0169(7) 0.0203(8) -0.0057(6) 0.0057(6) -0.0066(6) 
N2 0.0209(8) 0.0177(7) 0.0192(7) -0.0061(6) 0.0038(6) -0.0054(6) 
N3 0.0211(8) 0.0205(7) 0.0169(7) -0.0043(6) 0.0041(6) -0.0075(6) 
N4 0.0195(8) 0.0177(7) 0.0167(7) -0.0045(6) 0.0039(6) -0.0054(6) 
N5 0.0210(8) 0.0174(7) 0.0189(7) -0.0061(6) 0.0031(6) -0.0032(6) 
N6 0.0212(8) 0.0194(7) 0.0191(7) -0.0069(6) 0.0044(6) -0.0052(6) 
B1 0.0203(10) 0.0173(9) 0.0165(9) -0.0066(7) 0.0041(7) -0.0050(8) 
C1 0.0230(10) 0.0237(9) 0.0253(10) -0.0107(8) 0.0073(8) -0.0089(8) 
C2 0.0192(9) 0.0241(9) 0.0277(10) -0.0093(8) 0.0023(8) -0.0054(7) 
C3 0.0201(9) 0.0221(9) 0.0229(9) -0.0097(7) 0.0033(7) -0.0048(7) 
C4 0.0182(9) 0.0221(9) 0.0210(9) -0.0081(7) 0.0035(7) -0.0061(7) 
C5 0.0236(10) 0.0236(9) 0.0239(9) -0.0109(7) 0.0038(7) -0.0088(8) 
C6 0.0191(9) 0.0182(8) 0.0220(9) -0.0067(7) 0.0048(7) -0.0061(7) 
C7 0.0226(9) 0.0207(9) 0.0226(9) -0.0103(7) 0.0045(7) -0.0057(7) 
C8 0.0210(9) 0.0240(9) 0.0236(9) -0.0118(7) 0.0076(7) -0.0050(7) 
C9 0.0197(9) 0.0240(9) 0.0226(9) -0.0107(7) 0.0059(7) -0.0068(7) 
C10 0.0235(10) 0.0235(9) 0.0301(10) -0.0084(8) 0.0088(8) -0.0094(8) 
C11 0.0489(14) 0.0389(12) 0.0314(12) -0.0138(10) 0.0109(10) -0.0270(11) 
C12 0.0546(16) 0.0450(14) 0.0415(14) -0.0142(11) 0.0068(12) -0.0332(13) 
C13 0.0360(13) 0.0320(11) 0.0397(13) -0.0050(10) 0.0088(10) -0.0199(10) 
C14 0.0241(10) 0.0292(10) 0.0290(11) -0.0045(8) 0.0051(8) -0.0076(8) 
C15 0.0193(9) 0.0255(9) 0.0272(10) -0.0066(8) 0.0031(8) -0.0071(8) 
C16 0.0189(9) 0.0189(8) 0.0248(9) -0.0076(7) 0.0012(7) -0.0058(7) 
C17 0.0231(10) 0.0220(9) 0.0262(10) -0.0077(8) 0.0025(8) -0.0028(8) 
C18 0.0255(11) 0.0328(11) 0.0279(11) -0.0069(9) 0.0074(8) -0.0063(9) 
C19 0.0307(11) 0.0263(10) 0.0304(11) 0.0002(8) -0.0005(9) -0.0059(9) 
C20 0.0212(10) 0.0244(10) 0.0368(12) -0.0104(9) 0.0007(8) -0.0024(8) 
C21 0.0218(10) 0.0255(9) 0.0302(11) -0.0107(8) 0.0037(8) -0.0066(8) 
C22 0.0290(11) 0.0309(10) 0.0188(9) -0.0059(8) 0.0022(8) -0.0153(9) 
C23 0.0290(11) 0.0343(11) 0.0284(11) -0.0052(9) 0.0030(9) -0.0151(9) 
C24 0.0317(13) 0.0570(16) 0.0332(13) 0.0016(11) -0.0052(10) -0.0203(12) 
C25 0.0432(15) 0.083(2) 0.0221(12) -0.0062(12) -0.0018(10) -0.0365(15) 
C26 0.0569(17) 0.0766(19) 0.0282(12) -0.0248(13) 0.0111(12) -0.0390(16) 
C27 0.0431(13) 0.0467(13) 0.0248(11) -0.0168(10) 0.0055(9) -0.0210(11) 
C28 0.0232(9) 0.0175(8) 0.0203(9) -0.0086(7) 0.0050(7) -0.0039(7) 
C29 0.0210(9) 0.0198(8) 0.0265(10) -0.0106(7) 0.0043(7) -0.0042(7) 
C30 0.0246(10) 0.0212(9) 0.0250(10) -0.0059(8) -0.0011(8) -0.0012(8) 
C31 0.0323(11) 0.0216(9) 0.0274(10) -0.0033(8) 0.0046(9) -0.0104(8) 
C32 0.0319(11) 0.0289(10) 0.0271(10) -0.0068(8) 0.0032(8) -0.0153(9) 
C33 0.0293(11) 0.0238(9) 0.0226(9) -0.0076(8) 0.0006(8) -0.0101(8) 
C34 0.0204(9) 0.0206(9) 0.0243(9) -0.0084(7) 0.0048(7) -0.0072(7) 
C35 0.0281(10) 0.0232(9) 0.0265(10) -0.0099(8) 0.0059(8) -0.0053(8) 
C36 0.0316(11) 0.0264(10) 0.0239(10) -0.0039(8) 0.0012(8) -0.0080(9) 
C37 0.0279(11) 0.0215(9) 0.0357(12) -0.0034(8) -0.0016(9) -0.0048(8) 
C38 0.0272(11) 0.0219(9) 0.0409(12) -0.0143(9) 0.0025(9) -0.0038(8) 
C39 0.0238(10) 0.0244(9) 0.0285(10) -0.0129(8) 0.0039(8) -0.0070(8) 
C40 0.0187(9) 0.0262(9) 0.0179(9) -0.0076(7) 0.0056(7) -0.0077(7) 
C41 0.0218(9) 0.0276(10) 0.0224(9) -0.0109(8) 0.0052(7) -0.0090(8) 
C42 0.0285(11) 0.0255(10) 0.0272(10) -0.0061(8) 0.0048(8) -0.0092(8) 
C43 0.0315(11) 0.0361(11) 0.0185(9) -0.0044(8) 0.0093(8) -0.0113(9) 
C44 0.0376(12) 0.0416(12) 0.0204(10) -0.0149(9) 0.0096(9) -0.0133(10) 
C45 0.0277(10) 0.0313(10) 0.0234(10) -0.0135(8) 0.0100(8) -0.0087(8) 
C46 0.0177(9) 0.0231(9) 0.0247(10) -0.0038(7) 0.0008(7) -0.0057(7) 
C47 0.0230(10) 0.0225(9) 0.0293(10) -0.0046(8) 0.0052(8) -0.0052(8) 
C48 0.0306(12) 0.0204(10) 0.0477(14) -0.0069(9) 0.0082(10) -0.0058(9) 
C49 0.0334(12) 0.0246(11) 0.0440(14) 0.0053(10) 0.0062(10) -0.0079(9) 
C50 0.0272(11) 0.0380(12) 0.0243(11) 0.0051(9) 0.0028(9) -0.0108(9) 
C51 0.0235(10) 0.0306(10) 0.0226(10) -0.0041(8) 0.0004(8) -0.0061(8) 
  
_geom_special_details 
; 
 All esds (except the esd in the dihedral angle between two l.s. planes) 
 are estimated using the full covariance matrix.  The cell esds are taken 
 into account individually in the estimation of esds in distances, angles 
 and torsion angles; correlations between esds in cell parameters are only 
 used when they are defined by crystal symmetry.  An approximate (isotropic) 
 treatment of cell esds is used for estimating esds involving l.s. planes. 
; 
  
loop_ 
 _geom_bond_atom_site_label_1 
 _geom_bond_atom_site_label_2 
 _geom_bond_distance 
 _geom_bond_site_symmetry_2 
 _geom_bond_publ_flag 
Ni1 O1 1.9035(13) . ? 
Ni1 N1 2.0319(16) . ? 
Ni1 N5 2.0348(15) . ? 
Ni1 N3 2.0387(15) . ? 
Ni1 Cl1 2.5601(6) . ? 
Cl1 C47 1.749(2) . ? 
Cl2 C51 1.741(2) . ? 
O1 C46 1.311(2) . ? 
N1 C1 1.347(2) . ? 
N1 N2 1.374(2) . ? 
N2 C3 1.351(2) . ? 
N2 B1 1.535(3) . ? 
N3 C4 1.336(2) . ? 
N3 N4 1.368(2) . ? 
N4 C6 1.354(2) . ? 
N4 B1 1.540(2) . ? 
N5 C7 1.345(2) . ? 
N5 N6 1.370(2) . ? 
N6 C9 1.355(2) . ? 
N6 B1 1.541(3) . ? 
B1 H1 1.0000 . ? 
C1 C2 1.396(3) . ? 
C1 C10 1.479(3) . ? 
C2 C3 1.380(3) . ? 
C2 H2 0.9500 . ? 
C3 C16 1.480(3) . ? 
C4 C5 1.396(3) . ? 
C4 C22 1.473(3) . ? 
C5 C6 1.377(3) . ? 
C5 H5 0.9500 . ? 
C6 C28 1.473(2) . ? 
C7 C8 1.394(3) . ? 
C7 C34 1.472(3) . ? 
C8 C9 1.380(3) . ? 
C8 H8 0.9500 . ? 
C9 C40 1.474(3) . ? 
C10 C15 1.378(3) . ? 
C10 C11 1.390(3) . ? 
C11 C12 1.392(3) . ? 
C11 H11 0.9500 . ? 
C12 C13 1.381(3) . ? 
C12 H12 0.9500 . ? 
C13 C14 1.379(3) . ? 
C13 H13 0.9500 . ? 
C14 C15 1.388(3) . ? 
C14 H14 0.9500 . ? 
C15 H15 0.9500 . ? 
C16 C21 1.385(3) . ? 
C16 C17 1.401(3) . ? 
C17 C18 1.384(3) . ? 
C17 H17 0.9500 . ? 
C18 C19 1.381(3) . ? 
C18 H18 0.9500 . ? 
C19 C20 1.386(3) . ? 
C19 H19 0.9500 . ? 
C20 C21 1.390(3) . ? 
C20 H20 0.9500 . ? 
C21 H21 0.9500 . ? 
C22 C27 1.387(3) . ? 
C22 C23 1.387(3) . ? 
C23 C24 1.387(3) . ? 
C23 H23 0.9500 . ? 
C24 C25 1.374(4) . ? 
C24 H24 0.9500 . ? 
C25 C26 1.374(4) . ? 
C25 H25 0.9500 . ? 
C26 C27 1.391(3) . ? 
C26 H26 0.9500 . ? 
C27 H27 0.9500 . ? 
C28 C29 1.392(3) . ? 
C28 C33 1.396(3) . ? 
C29 C30 1.386(3) . ? 
C29 H29 0.9500 . ? 
C30 C31 1.381(3) . ? 
C30 H30 0.9500 . ? 
C31 C32 1.378(3) . ? 
C31 H31 0.9500 . ? 
C32 C33 1.385(3) . ? 
C32 H32 0.9500 . ? 
C33 H33 0.9500 . ? 
C34 C35 1.386(3) . ? 
C34 C39 1.397(3) . ? 
C35 C36 1.391(3) . ? 
C35 H35 0.9500 . ? 
C36 C37 1.389(3) . ? 
C36 H36 0.9500 . ? 
C37 C38 1.381(3) . ? 
C37 H37 0.9500 . ? 
C38 C39 1.382(3) . ? 
C38 H38 0.9500 . ? 
C39 H39 0.9500 . ? 
C40 C41 1.393(3) . ? 
C40 C45 1.404(3) . ? 
C41 C42 1.384(3) . ? 
C41 H41 0.9500 . ? 
C42 C43 1.386(3) . ? 
C42 H42 0.9500 . ? 
C43 C44 1.380(3) . ? 
C43 H43 0.9500 . ? 
C44 C45 1.379(3) . ? 
C44 H44 0.9500 . ? 
C45 H45 0.9500 . ? 
C46 C47 1.402(3) . ? 
C46 C51 1.406(3) . ? 
C47 C48 1.385(3) . ? 
C48 C49 1.378(3) . ? 
C48 H48 0.9500 . ? 
C49 C50 1.386(4) . ? 
C49 H49 0.9500 . ? 
C50 C51 1.380(3) . ? 
C50 H50 0.9500 . ? 
  
loop_ 
 _geom_angle_atom_site_label_1 
 _geom_angle_atom_site_label_2 
 _geom_angle_atom_site_label_3 
 _geom_angle 
 _geom_angle_site_symmetry_1 
 _geom_angle_site_symmetry_3 
 _geom_angle_publ_flag 
O1 Ni1 N1 116.67(6) . . ? 
O1 Ni1 N5 149.52(6) . . ? 
N1 Ni1 N5 93.50(6) . . ? 
O1 Ni1 N3 93.95(6) . . ? 
N1 Ni1 N3 93.48(6) . . ? 
N5 Ni1 N3 88.05(6) . . ? 
O1 Ni1 Cl1 80.14(4) . . ? 
N1 Ni1 Cl1 96.82(4) . . ? 
N5 Ni1 Cl1 92.74(4) . . ? 
N3 Ni1 Cl1 169.60(5) . . ? 
C47 Cl1 Ni1 94.92(7) . . ? 
C46 O1 Ni1 125.79(13) . . ? 
C1 N1 N2 106.14(15) . . ? 
C1 N1 Ni1 139.54(13) . . ? 
N2 N1 Ni1 114.12(11) . . ? 
C3 N2 N1 110.36(15) . . ? 
C3 N2 B1 129.93(15) . . ? 
N1 N2 B1 119.66(15) . . ? 
C4 N3 N4 106.83(14) . . ? 
C4 N3 Ni1 138.89(13) . . ? 
N4 N3 Ni1 114.29(11) . . ? 
C6 N4 N3 109.93(14) . . ? 
C6 N4 B1 130.49(15) . . ? 
N3 N4 B1 119.32(14) . . ? 
C7 N5 N6 106.49(14) . . ? 
C7 N5 Ni1 140.05(13) . . ? 
N6 N5 Ni1 113.30(11) . . ? 
C9 N6 N5 110.10(15) . . ? 
C9 N6 B1 129.49(15) . . ? 
N5 N6 B1 120.39(14) . . ? 
N2 B1 N4 109.20(14) . . ? 
N2 B1 N6 109.53(14) . . ? 
N4 B1 N6 108.58(15) . . ? 
N2 B1 H1 109.8 . . ? 
N4 B1 H1 109.8 . . ? 
N6 B1 H1 109.8 . . ? 
N1 C1 C2 109.85(16) . . ? 
N1 C1 C10 124.08(18) . . ? 
C2 C1 C10 126.07(18) . . ? 
C3 C2 C1 106.12(17) . . ? 
C3 C2 H2 126.9 . . ? 
C1 C2 H2 126.9 . . ? 
N2 C3 C2 107.52(16) . . ? 
N2 C3 C16 124.05(16) . . ? 
C2 C3 C16 128.43(18) . . ? 
N3 C4 C5 109.67(16) . . ? 
N3 C4 C22 124.92(17) . . ? 
C5 C4 C22 125.18(17) . . ? 
C6 C5 C4 106.14(16) . . ? 
C6 C5 H5 126.9 . . ? 
C4 C5 H5 126.9 . . ? 
N4 C6 C5 107.42(15) . . ? 
N4 C6 C28 123.59(16) . . ? 
C5 C6 C28 128.82(17) . . ? 
N5 C7 C8 109.73(16) . . ? 
N5 C7 C34 124.36(16) . . ? 
C8 C7 C34 125.63(17) . . ? 
C9 C8 C7 106.21(16) . . ? 
C9 C8 H8 126.9 . . ? 
C7 C8 H8 126.9 . . ? 
N6 C9 C8 107.45(16) . . ? 
N6 C9 C40 124.07(17) . . ? 
C8 C9 C40 128.45(16) . . ? 
C15 C10 C11 119.53(18) . . ? 
C15 C10 C1 122.36(18) . . ? 
C11 C10 C1 118.00(19) . . ? 
C10 C11 C12 119.8(2) . . ? 
C10 C11 H11 120.1 . . ? 
C12 C11 H11 120.1 . . ? 
C13 C12 C11 119.9(2) . . ? 
C13 C12 H12 120.0 . . ? 
C11 C12 H12 120.0 . . ? 
C14 C13 C12 120.4(2) . . ? 
C14 C13 H13 119.8 . . ? 
C12 C13 H13 119.8 . . ? 
C13 C14 C15 119.5(2) . . ? 
C13 C14 H14 120.3 . . ? 
C15 C14 H14 120.3 . . ? 
C10 C15 C14 120.8(2) . . ? 
C10 C15 H15 119.6 . . ? 
C14 C15 H15 119.6 . . ? 
C21 C16 C17 119.26(18) . . ? 
C21 C16 C3 119.87(17) . . ? 
C17 C16 C3 120.86(17) . . ? 
C18 C17 C16 119.77(18) . . ? 
C18 C17 H17 120.1 . . ? 
C16 C17 H17 120.1 . . ? 
C19 C18 C17 120.52(19) . . ? 
C19 C18 H18 119.7 . . ? 
C17 C18 H18 119.7 . . ? 
C18 C19 C20 120.20(19) . . ? 
C18 C19 H19 119.9 . . ? 
C20 C19 H19 119.9 . . ? 
C19 C20 C21 119.50(19) . . ? 
C19 C20 H20 120.3 . . ? 
C21 C20 H20 120.3 . . ? 
C16 C21 C20 120.74(19) . . ? 
C16 C21 H21 119.6 . . ? 
C20 C21 H21 119.6 . . ? 
C27 C22 C23 118.7(2) . . ? 
C27 C22 C4 120.20(19) . . ? 
C23 C22 C4 120.79(18) . . ? 
C24 C23 C22 120.8(2) . . ? 
C24 C23 H23 119.6 . . ? 
C22 C23 H23 119.6 . . ? 
C25 C24 C23 119.9(3) . . ? 
C25 C24 H24 120.0 . . ? 
C23 C24 H24 120.0 . . ? 
C24 C25 C26 120.1(2) . . ? 
C24 C25 H25 119.9 . . ? 
C26 C25 H25 119.9 . . ? 
C25 C26 C27 120.1(2) . . ? 
C25 C26 H26 119.9 . . ? 
C27 C26 H26 119.9 . . ? 
C22 C27 C26 120.4(2) . . ? 
C22 C27 H27 119.8 . . ? 
C26 C27 H27 119.8 . . ? 
C29 C28 C33 119.02(17) . . ? 
C29 C28 C6 123.35(17) . . ? 
C33 C28 C6 117.62(17) . . ? 
C30 C29 C28 120.12(18) . . ? 
C30 C29 H29 119.9 . . ? 
C28 C29 H29 119.9 . . ? 
C31 C30 C29 120.30(19) . . ? 
C31 C30 H30 119.9 . . ? 
C29 C30 H30 119.9 . . ? 
C32 C31 C30 120.14(18) . . ? 
C32 C31 H31 119.9 . . ? 
C30 C31 H31 119.9 . . ? 
C31 C32 C33 120.03(19) . . ? 
C31 C32 H32 120.0 . . ? 
C33 C32 H32 120.0 . . ? 
C32 C33 C28 120.37(19) . . ? 
C32 C33 H33 119.8 . . ? 
C28 C33 H33 119.8 . . ? 
C35 C34 C39 118.66(18) . . ? 
C35 C34 C7 122.03(17) . . ? 
C39 C34 C7 119.08(17) . . ? 
C34 C35 C36 120.82(19) . . ? 
C34 C35 H35 119.6 . . ? 
C36 C35 H35 119.6 . . ? 
C37 C36 C35 119.8(2) . . ? 
C37 C36 H36 120.1 . . ? 
C35 C36 H36 120.1 . . ? 
C38 C37 C36 119.72(19) . . ? 
C38 C37 H37 120.1 . . ? 
C36 C37 H37 120.1 . . ? 
C37 C38 C39 120.41(19) . . ? 
C37 C38 H38 119.8 . . ? 
C39 C38 H38 119.8 . . ? 
C38 C39 C34 120.58(19) . . ? 
C38 C39 H39 119.7 . . ? 
C34 C39 H39 119.7 . . ? 
C41 C40 C45 119.00(17) . . ? 
C41 C40 C9 122.99(17) . . ? 
C45 C40 C9 118.00(17) . . ? 
C42 C41 C40 120.48(18) . . ? 
C42 C41 H41 119.8 . . ? 
C40 C41 H41 119.8 . . ? 
C41 C42 C43 119.90(19) . . ? 
C41 C42 H42 120.0 . . ? 
C43 C42 H42 120.0 . . ? 
C44 C43 C42 120.06(19) . . ? 
C44 C43 H43 120.0 . . ? 
C42 C43 H43 120.0 . . ? 
C45 C44 C43 120.55(19) . . ? 
C45 C44 H44 119.7 . . ? 
C43 C44 H44 119.7 . . ? 
C44 C45 C40 119.99(19) . . ? 
C44 C45 H45 120.0 . . ? 
C40 C45 H45 120.0 . . ? 
O1 C46 C47 123.49(18) . . ? 
O1 C46 C51 122.43(18) . . ? 
C47 C46 C51 114.04(17) . . ? 
C48 C47 C46 124.7(2) . . ? 
C48 C47 Cl1 119.89(17) . . ? 
C46 C47 Cl1 115.41(14) . . ? 
C49 C48 C47 118.2(2) . . ? 
C49 C48 H48 120.9 . . ? 
C47 C48 H48 120.9 . . ? 
C48 C49 C50 120.2(2) . . ? 
C48 C49 H49 119.9 . . ? 
C50 C49 H49 119.9 . . ? 
C51 C50 C49 119.8(2) . . ? 
C51 C50 H50 120.1 . . ? 
C49 C50 H50 120.1 . . ? 
C50 C51 C46 123.0(2) . . ? 
C50 C51 Cl2 119.68(17) . . ? 
C46 C51 Cl2 117.31(15) . . ? 
  
loop_ 
 _geom_torsion_atom_site_label_1 
 _geom_torsion_atom_site_label_2 
 _geom_torsion_atom_site_label_3 
 _geom_torsion_atom_site_label_4 
 _geom_torsion 
 _geom_torsion_site_symmetry_1 
 _geom_torsion_site_symmetry_2 
 _geom_torsion_site_symmetry_3 
 _geom_torsion_site_symmetry_4 
 _geom_torsion_publ_flag 
O1 Ni1 Cl1 C47 -3.18(8) . . . . ? 
N1 Ni1 Cl1 C47 112.80(8) . . . . ? 
N5 Ni1 Cl1 C47 -153.34(8) . . . . ? 
N3 Ni1 Cl1 C47 -59.2(3) . . . . ? 
N1 Ni1 O1 C46 -87.77(15) . . . . ? 
N5 Ni1 O1 C46 83.45(19) . . . . ? 
N3 Ni1 O1 C46 176.33(15) . . . . ? 
Cl1 Ni1 O1 C46 4.96(14) . . . . ? 
O1 Ni1 N1 C1 34.9(2) . . . . ? 
N5 Ni1 N1 C1 -140.7(2) . . . . ? 
N3 Ni1 N1 C1 131.1(2) . . . . ? 
Cl1 Ni1 N1 C1 -47.5(2) . . . . ? 
O1 Ni1 N1 N2 -138.86(11) . . . . ? 
N5 Ni1 N1 N2 45.59(12) . . . . ? 
N3 Ni1 N1 N2 -42.67(12) . . . . ? 
Cl1 Ni1 N1 N2 138.78(11) . . . . ? 
C1 N1 N2 C3 -0.20(19) . . . . ? 
Ni1 N1 N2 C3 175.58(12) . . . . ? 
C1 N1 N2 B1 -177.89(15) . . . . ? 
Ni1 N1 N2 B1 -2.11(19) . . . . ? 
O1 Ni1 N3 C4 -22.1(2) . . . . ? 
N1 Ni1 N3 C4 -139.2(2) . . . . ? 
N5 Ni1 N3 C4 127.4(2) . . . . ? 
Cl1 Ni1 N3 C4 32.9(4) . . . . ? 
O1 Ni1 N3 N4 158.08(12) . . . . ? 
N1 Ni1 N3 N4 41.03(12) . . . . ? 
N5 Ni1 N3 N4 -52.37(12) . . . . ? 
Cl1 Ni1 N3 N4 -146.94(19) . . . . ? 
C4 N3 N4 C6 0.3(2) . . . . ? 
Ni1 N3 N4 C6 -179.87(12) . . . . ? 
C4 N3 N4 B1 -174.55(15) . . . . ? 
Ni1 N3 N4 B1 5.32(19) . . . . ? 
O1 Ni1 N5 C7 -38.4(3) . . . . ? 
N1 Ni1 N5 C7 133.8(2) . . . . ? 
N3 Ni1 N5 C7 -132.9(2) . . . . ? 
Cl1 Ni1 N5 C7 36.8(2) . . . . ? 
O1 Ni1 N5 N6 147.10(12) . . . . ? 
N1 Ni1 N5 N6 -40.75(12) . . . . ? 
N3 Ni1 N5 N6 52.62(12) . . . . ? 
Cl1 Ni1 N5 N6 -137.76(11) . . . . ? 
C7 N5 N6 C9 -1.5(2) . . . . ? 
Ni1 N5 N6 C9 174.81(12) . . . . ? 
C7 N5 N6 B1 177.08(16) . . . . ? 
Ni1 N5 N6 B1 -6.59(19) . . . . ? 
C3 N2 B1 N4 -115.9(2) . . . . ? 
N1 N2 B1 N4 61.3(2) . . . . ? 
C3 N2 B1 N6 125.33(19) . . . . ? 
N1 N2 B1 N6 -57.5(2) . . . . ? 
C6 N4 B1 N2 123.12(19) . . . . ? 
N3 N4 B1 N2 -63.3(2) . . . . ? 
C6 N4 B1 N6 -117.50(19) . . . . ? 
N3 N4 B1 N6 56.1(2) . . . . ? 
C9 N6 B1 N2 -118.2(2) . . . . ? 
N5 N6 B1 N2 63.5(2) . . . . ? 
C9 N6 B1 N4 122.67(19) . . . . ? 
N5 N6 B1 N4 -55.6(2) . . . . ? 
N2 N1 C1 C2 0.4(2) . . . . ? 
Ni1 N1 C1 C2 -173.65(15) . . . . ? 
N2 N1 C1 C10 -179.34(17) . . . . ? 
Ni1 N1 C1 C10 6.6(3) . . . . ? 
N1 C1 C2 C3 -0.5(2) . . . . ? 
C10 C1 C2 C3 179.28(18) . . . . ? 
N1 N2 C3 C2 -0.1(2) . . . . ? 
B1 N2 C3 C2 177.30(17) . . . . ? 
N1 N2 C3 C16 179.24(16) . . . . ? 
B1 N2 C3 C16 -3.4(3) . . . . ? 
C1 C2 C3 N2 0.3(2) . . . . ? 
C1 C2 C3 C16 -178.96(18) . . . . ? 
N4 N3 C4 C5 -1.0(2) . . . . ? 
Ni1 N3 C4 C5 179.20(14) . . . . ? 
N4 N3 C4 C22 173.84(17) . . . . ? 
Ni1 N3 C4 C22 -6.0(3) . . . . ? 
N3 C4 C5 C6 1.3(2) . . . . ? 
C22 C4 C5 C6 -173.48(18) . . . . ? 
N3 N4 C6 C5 0.6(2) . . . . ? 
B1 N4 C6 C5 174.61(18) . . . . ? 
N3 N4 C6 C28 -175.04(16) . . . . ? 
B1 N4 C6 C28 -1.0(3) . . . . ? 
C4 C5 C6 N4 -1.1(2) . . . . ? 
C4 C5 C6 C28 174.17(18) . . . . ? 
N6 N5 C7 C8 1.5(2) . . . . ? 
Ni1 N5 C7 C8 -173.22(15) . . . . ? 
N6 N5 C7 C34 -172.62(17) . . . . ? 
Ni1 N5 C7 C34 12.6(3) . . . . ? 
N5 C7 C8 C9 -1.0(2) . . . . ? 
C34 C7 C8 C9 173.07(18) . . . . ? 
N5 N6 C9 C8 0.9(2) . . . . ? 
B1 N6 C9 C8 -177.52(17) . . . . ? 
N5 N6 C9 C40 -177.12(17) . . . . ? 
B1 N6 C9 C40 4.4(3) . . . . ? 
C7 C8 C9 N6 0.0(2) . . . . ? 
C7 C8 C9 C40 177.95(19) . . . . ? 
N1 C1 C10 C15 -45.2(3) . . . . ? 
C2 C1 C10 C15 135.1(2) . . . . ? 
N1 C1 C10 C11 138.6(2) . . . . ? 
C2 C1 C10 C11 -41.2(3) . . . . ? 
C15 C10 C11 C12 -0.5(4) . . . . ? 
C1 C10 C11 C12 175.8(2) . . . . ? 
C10 C11 C12 C13 1.3(4) . . . . ? 
C11 C12 C13 C14 -0.6(4) . . . . ? 
C12 C13 C14 C15 -0.7(3) . . . . ? 
C11 C10 C15 C14 -0.8(3) . . . . ? 
C1 C10 C15 C14 -176.98(19) . . . . ? 
C13 C14 C15 C10 1.4(3) . . . . ? 
N2 C3 C16 C21 127.2(2) . . . . ? 
C2 C3 C16 C21 -53.6(3) . . . . ? 
N2 C3 C16 C17 -54.1(3) . . . . ? 
C2 C3 C16 C17 125.0(2) . . . . ? 
C21 C16 C17 C18 -0.9(3) . . . . ? 
C3 C16 C17 C18 -179.57(19) . . . . ? 
C16 C17 C18 C19 0.2(3) . . . . ? 
C17 C18 C19 C20 0.9(3) . . . . ? 
C18 C19 C20 C21 -1.2(3) . . . . ? 
C17 C16 C21 C20 0.6(3) . . . . ? 
C3 C16 C21 C20 179.25(18) . . . . ? 
C19 C20 C21 C16 0.5(3) . . . . ? 
N3 C4 C22 C27 142.2(2) . . . . ? 
C5 C4 C22 C27 -43.8(3) . . . . ? 
N3 C4 C22 C23 -44.6(3) . . . . ? 
C5 C4 C22 C23 129.5(2) . . . . ? 
C27 C22 C23 C24 1.2(3) . . . . ? 
C4 C22 C23 C24 -172.10(19) . . . . ? 
C22 C23 C24 C25 0.5(3) . . . . ? 
C23 C24 C25 C26 -2.3(4) . . . . ? 
C24 C25 C26 C27 2.4(4) . . . . ? 
C23 C22 C27 C26 -1.2(3) . . . . ? 
C4 C22 C27 C26 172.2(2) . . . . ? 
C25 C26 C27 C22 -0.7(4) . . . . ? 
N4 C6 C28 C29 -47.6(3) . . . . ? 
C5 C6 C28 C29 137.8(2) . . . . ? 
N4 C6 C28 C33 131.29(19) . . . . ? 
C5 C6 C28 C33 -43.3(3) . . . . ? 
C33 C28 C29 C30 -1.7(3) . . . . ? 
C6 C28 C29 C30 177.10(17) . . . . ? 
C28 C29 C30 C31 1.2(3) . . . . ? 
C29 C30 C31 C32 0.2(3) . . . . ? 
C30 C31 C32 C33 -1.1(3) . . . . ? 
C31 C32 C33 C28 0.6(3) . . . . ? 
C29 C28 C33 C32 0.8(3) . . . . ? 
C6 C28 C33 C32 -178.08(18) . . . . ? 
N5 C7 C34 C35 32.0(3) . . . . ? 
C8 C7 C34 C35 -141.2(2) . . . . ? 
N5 C7 C34 C39 -153.66(18) . . . . ? 
C8 C7 C34 C39 33.1(3) . . . . ? 
C39 C34 C35 C36 -0.8(3) . . . . ? 
C7 C34 C35 C36 173.56(18) . . . . ? 
C34 C35 C36 C37 0.7(3) . . . . ? 
C35 C36 C37 C38 -0.4(3) . . . . ? 
C36 C37 C38 C39 0.3(3) . . . . ? 
C37 C38 C39 C34 -0.5(3) . . . . ? 
C35 C34 C39 C38 0.7(3) . . . . ? 
C7 C34 C39 C38 -173.83(18) . . . . ? 
N6 C9 C40 C41 -57.4(3) . . . . ? 
C8 C9 C40 C41 125.0(2) . . . . ? 
N6 C9 C40 C45 123.7(2) . . . . ? 
C8 C9 C40 C45 -53.9(3) . . . . ? 
C45 C40 C41 C42 -0.4(3) . . . . ? 
C9 C40 C41 C42 -179.27(18) . . . . ? 
C40 C41 C42 C43 -0.6(3) . . . . ? 
C41 C42 C43 C44 1.1(3) . . . . ? 
C42 C43 C44 C45 -0.7(3) . . . . ? 
C43 C44 C45 C40 -0.2(3) . . . . ? 
C41 C40 C45 C44 0.7(3) . . . . ? 
C9 C40 C45 C44 179.71(18) . . . . ? 
Ni1 O1 C46 C47 -5.3(3) . . . . ? 
Ni1 O1 C46 C51 172.06(14) . . . . ? 
O1 C46 C47 C48 178.8(2) . . . . ? 
C51 C46 C47 C48 1.2(3) . . . . ? 
O1 C46 C47 Cl1 1.1(3) . . . . ? 
C51 C46 C47 Cl1 -176.50(14) . . . . ? 
Ni1 Cl1 C47 C48 -175.80(17) . . . . ? 
Ni1 Cl1 C47 C46 1.99(16) . . . . ? 
C46 C47 C48 C49 -1.0(3) . . . . ? 
Cl1 C47 C48 C49 176.56(18) . . . . ? 
C47 C48 C49 C50 0.3(4) . . . . ? 
C48 C49 C50 C51 0.1(4) . . . . ? 
C49 C50 C51 C46 0.1(3) . . . . ? 
C49 C50 C51 Cl2 179.47(18) . . . . ? 
O1 C46 C51 C50 -178.31(19) . . . . ? 
C47 C46 C51 C50 -0.7(3) . . . . ? 
O1 C46 C51 Cl2 2.3(3) . . . . ? 
C47 C46 C51 Cl2 179.90(15) . . . . ? 
  
_diffrn_measured_fraction_theta_max    0.994 
_diffrn_reflns_theta_full              33.14 
_diffrn_measured_fraction_theta_full   0.994 
_refine_diff_density_max    0.647 
_refine_diff_density_min   -0.461 
_refine_diff_density_rms    0.078 

#===END

data_6 
  
_vrf_PLAT601_6 
; 
PROBLEM: _B Structure Contains Solvent Accessible VOIDS of .. 168 A**3 
RESPONSE: Highly disordered solvent located in a pocket at a 
crystallographic inversion center could not be modeled satisfactorily. 
Reflection contributions from this solvent were removed using program 
PLATON, function SQUEEZE (Spek, 2003), which determined there to be 
59 electrons in 169.1 \%A^3^ removed per unit cell. Because the exact 
identify and amount of this solvent could not be determined, no solvent 
was included in the atom list or in the molecular formula. Thus all 
calculated items that derive from the molecular formula (e.g., F(000), 
density, molecular weight, etc.) are known to be incorrect. 
; 
  
_vrf_RINTA01_6 
; 
PROBLEM: _C  The value of Rint is greater than 0.12 
             Rint given   0.146 
RESPONSE: The small crystal diffracted weakly. 
; 
  
_vrf_PLAT026_6 
; 
PROBLEM: _C Ratio Observed / Unique Reflections too Low .... 48 Perc. 
RESPONSE: See above. 
; 
  
_vrf_PLAT341_6 
; 
PROBLEM: _C Low Bond Precision on  C-C Bonds ............... 0.0110 Ang 
RESPONSE: See above. 
; 
  
_audit_creation_method            SHELXL-97 
_chemical_name_systematic 
; 
 6 
; 
_chemical_name_common             holmb03 
_chemical_melting_point           ? 
_chemical_formula_moiety          'C51 H37 B Br2 N6 Ni O' 
_chemical_formula_sum             'C51 H37 B Br2 N6 Ni O' 
_chemical_formula_weight          979.21 
  
loop_ 
 _atom_type_symbol 
 _atom_type_description 
 _atom_type_scat_dispersion_real 
 _atom_type_scat_dispersion_imag 
 _atom_type_scat_source 
 'C'  'C'   0.0033   0.0016 
 'International Tables Vol C Tables 4.2.6.8 and 6.1.1.4' 
 'H'  'H'   0.0000   0.0000 
 'International Tables Vol C Tables 4.2.6.8 and 6.1.1.4' 
 'B'  'B'   0.0013   0.0007 
 'International Tables Vol C Tables 4.2.6.8 and 6.1.1.4' 
 'N'  'N'   0.0061   0.0033 
 'International Tables Vol C Tables 4.2.6.8 and 6.1.1.4' 
 'O'  'O'   0.0106   0.0060 
 'International Tables Vol C Tables 4.2.6.8 and 6.1.1.4' 
 'Ni'  'Ni'   0.3393   1.1124 
 'International Tables Vol C Tables 4.2.6.8 and 6.1.1.4' 
 'Br'  'Br'  -0.2901   2.4595 
 'International Tables Vol C Tables 4.2.6.8 and 6.1.1.4' 
  
_symmetry_cell_setting            triclinic 
_symmetry_space_group_name_H-M    'P -1' 
  
loop_ 
 _symmetry_equiv_pos_as_xyz 
 'x, y, z' 
 '-x, -y, -z' 
  
_cell_length_a                    12.4504(15) 
_cell_length_b                    12.8726(16) 
_cell_length_c                    15.8829(19) 
_cell_angle_alpha                 90.729(2) 
_cell_angle_beta                  100.184(2) 
_cell_angle_gamma                 117.451(2) 
_cell_volume                      2210.4(5) 
_cell_formula_units_Z             2 
_cell_measurement_temperature     100.0(5) 
_cell_measurement_reflns_used     1804 
_cell_measurement_theta_min       2.33 
_cell_measurement_theta_max       20.53 
  
_exptl_crystal_description        plate 
_exptl_crystal_colour             yellow-orange 
_exptl_crystal_size_max           0.18 
_exptl_crystal_size_mid           0.14 
_exptl_crystal_size_min           0.05 
_exptl_crystal_density_meas       ? 
_exptl_crystal_density_diffrn     1.471 
_exptl_crystal_density_method     'not measured' 
_exptl_crystal_F_000              992 
_exptl_absorpt_coefficient_mu     2.293 
_exptl_absorpt_correction_type    multi-scan 
_exptl_absorpt_correction_T_min   0.6830 
_exptl_absorpt_correction_T_max   0.8940 
_exptl_absorpt_process_details    'SADABS (Sheldrick, 2008)' 
  
_exptl_special_details 
; 
 ? 
; 
  
_diffrn_ambient_temperature       100.0(5) 
_diffrn_radiation_wavelength      0.71073 
_diffrn_radiation_type            MoK\a 
_diffrn_radiation_source          'fine-focus sealed tube' 
_diffrn_radiation_monochromator   graphite 
_diffrn_measurement_device_type   'Bruker SMART APEX II CCD Platform' 
_diffrn_measurement_method        'area detector, \w scans per \f' 
_diffrn_detector_area_resol_mean  ? 
_diffrn_standards_number          0 
_diffrn_standards_interval_count  ? 
_diffrn_standards_interval_time   ? 
_diffrn_standards_decay_%         ? 
_diffrn_reflns_number             23848 
_diffrn_reflns_av_R_equivalents   0.1462 
_diffrn_reflns_av_sigmaI/netI     0.1816 
_diffrn_reflns_limit_h_min        -14 
_diffrn_reflns_limit_h_max        14 
_diffrn_reflns_limit_k_min        -15 
_diffrn_reflns_limit_k_max        15 
_diffrn_reflns_limit_l_min        -18 
_diffrn_reflns_limit_l_max        18 
_diffrn_reflns_theta_min          1.79 
_diffrn_reflns_theta_max          25.03 
_reflns_number_total              7809 
_reflns_number_gt                 3766 
_reflns_threshold_expression      >2sigma(I) 
  
_computing_data_collection        'APEX2 (Bruker, 2011)' 
_computing_cell_refinement        'SAINT (Bruker, 2009)' 
_computing_data_reduction         'SAINT (Bruker, 2009)' 
_computing_structure_solution     'SIR97 (Altomare et al., 1999)' 
_computing_structure_refinement   'SHELXL-97 (Sheldrick, 2008)' 
_computing_molecular_graphics     'SHELXTL (Sheldrick, 2008)' 
_computing_publication_material   'SHELXTL (Sheldrick, 2008)' 
  
_refine_special_details 
; 
 Refinement of F^2^ against ALL reflections.  The weighted R-factor wR and 
 goodness of fit S are based on F^2^, conventional R-factors R are based 
 on F, with F set to zero for negative F^2^. The threshold expression of 
 F^2^ > 2sigma(F^2^) is used only for calculating R-factors(gt) etc. and is 
 not relevant to the choice of reflections for refinement.  R-factors based 
 on F^2^ are statistically about twice as large as those based on F, and R- 
 factors based on ALL data will be even larger. 
  
 Highly disordered solvent located in a pocket at a crystallographic 
 inversion center could not be modeled satisfactorily. Reflection 
 contributions from this solvent were removed using program PLATON, 
 function SQUEEZE (Spek, 2003), which determined there to be 59 electrons 
 in 169.1 \%A^3^ removed per unit cell. Because the exact identify and 
 amount of this solvent could not be determined, no solvent was included 
 in the atom list or in the molecular formula. Thus all calculated items 
 that derive from the molecular formula (e.g., F(000), density, molecular 
 weight, etc.) are known to be incorrect. 
; 
  
_refine_ls_structure_factor_coef  Fsqd 
_refine_ls_matrix_type            full 
_refine_ls_weighting_scheme       calc 
_refine_ls_weighting_details 
 'calc w=1/[\s^2^(Fo^2^)+(0.0373P)^2^+0.0000P] where P=(Fo^2^+2Fc^2^)/3' 
_atom_sites_solution_primary      direct 
_atom_sites_solution_secondary    difmap 
_atom_sites_solution_hydrogens    geom 
_refine_ls_hydrogen_treatment     constr 
_refine_ls_extinction_method      none 
_refine_ls_extinction_coef        ? 
_refine_ls_number_reflns          7809 
_refine_ls_number_parameters      559 
_refine_ls_number_restraints      0 
_refine_ls_R_factor_all           0.1447 
_refine_ls_R_factor_gt            0.0634 
_refine_ls_wR_factor_ref          0.1276 
_refine_ls_wR_factor_gt           0.1057 
_refine_ls_goodness_of_fit_ref    0.870 
_refine_ls_restrained_S_all       0.870 
_refine_ls_shift/su_max           0.000 
_refine_ls_shift/su_mean          0.000 
  
loop_ 
 _atom_site_label 
 _atom_site_type_symbol 
 _atom_site_fract_x 
 _atom_site_fract_y 
 _atom_site_fract_z 
 _atom_site_U_iso_or_equiv 
 _atom_site_adp_type 
 _atom_site_occupancy 
 _atom_site_symmetry_multiplicity 
 _atom_site_calc_flag 
 _atom_site_refinement_flags 
 _atom_site_disorder_assembly 
 _atom_site_disorder_group 
Ni1 Ni 0.35556(9) 0.18644(8) 0.74343(6) 0.0245(3) Uani 1 1 d . . . 
Br1 Br 0.41461(8) 0.37418(7) 0.85290(5) 0.0325(2) Uani 1 1 d . . . 
Br2 Br 0.18761(8) -0.08347(8) 0.95281(5) 0.0371(2) Uani 1 1 d . . . 
O1 O 0.3102(4) 0.1091(4) 0.8426(3) 0.0273(12) Uani 1 1 d . . . 
N1 N 0.2268(5) 0.2092(5) 0.6601(3) 0.0226(14) Uani 1 1 d . . . 
N2 N 0.2345(5) 0.2016(5) 0.5749(3) 0.0223(14) Uani 1 1 d . . . 
N3 N 0.3279(5) 0.0409(5) 0.6707(4) 0.0241(14) Uani 1 1 d . . . 
N4 N 0.3122(5) 0.0520(5) 0.5839(3) 0.0199(14) Uani 1 1 d . . . 
N5 N 0.4948(5) 0.2818(5) 0.6825(3) 0.0205(14) Uani 1 1 d . . . 
N6 N 0.4608(5) 0.2659(5) 0.5950(3) 0.0210(14) Uani 1 1 d . . . 
B1 B 0.3312(8) 0.1691(7) 0.5514(6) 0.027(2) Uani 1 1 d . . . 
H1 H 0.3237 0.1633 0.4876 0.032 Uiso 1 1 calc R . . 
C1 C 0.1302(7) 0.2315(6) 0.6614(5) 0.0254(18) Uani 1 1 d . . . 
C2 C 0.0777(7) 0.2350(6) 0.5767(4) 0.0255(18) Uani 1 1 d . . . 
H2 H 0.0092 0.2494 0.5592 0.031 Uiso 1 1 calc R . . 
C3 C 0.1426(7) 0.2140(6) 0.5236(5) 0.0271(18) Uani 1 1 d . . . 
C4 C 0.3182(6) -0.0677(6) 0.6791(4) 0.0238(18) Uani 1 1 d . . . 
C5 C 0.2943(6) -0.1265(6) 0.5981(4) 0.0248(18) Uani 1 1 d . . . 
H5 H 0.2813 -0.2043 0.5856 0.030 Uiso 1 1 calc R . . 
C6 C 0.2935(6) -0.0475(6) 0.5395(4) 0.0222(17) Uani 1 1 d . . . 
C7 C 0.6115(7) 0.3681(6) 0.7023(4) 0.0255(18) Uani 1 1 d . . . 
C8 C 0.6527(7) 0.4114(6) 0.6296(4) 0.0269(18) Uani 1 1 d . . . 
H8 H 0.7313 0.4743 0.6265 0.032 Uiso 1 1 calc R . . 
C9 C 0.5560(7) 0.3444(6) 0.5609(5) 0.0280(19) Uani 1 1 d . . . 
C10 C 0.0891(6) 0.2471(7) 0.7392(4) 0.0258(18) Uani 1 1 d . . . 
C11 C 0.0833(7) 0.1780(7) 0.8053(4) 0.0284(19) Uani 1 1 d . . . 
H11 H 0.1106 0.1205 0.8023 0.034 Uiso 1 1 calc R . . 
C12 C 0.0383(7) 0.1909(6) 0.8758(5) 0.0300(19) Uani 1 1 d . . . 
H12 H 0.0357 0.1432 0.9214 0.036 Uiso 1 1 calc R . . 
C13 C -0.0033(7) 0.2736(7) 0.8802(5) 0.040(2) Uani 1 1 d . . . 
H13 H -0.0358 0.2817 0.9283 0.048 Uiso 1 1 calc R . . 
C14 C 0.0026(7) 0.3444(7) 0.8144(5) 0.039(2) Uani 1 1 d . . . 
H14 H -0.0253 0.4015 0.8173 0.047 Uiso 1 1 calc R . . 
C15 C 0.0492(7) 0.3315(7) 0.7444(5) 0.037(2) Uani 1 1 d . . . 
H15 H 0.0542 0.3807 0.6996 0.044 Uiso 1 1 calc R . . 
C16 C 0.1224(6) 0.2027(6) 0.4300(4) 0.0231(17) Uani 1 1 d . . . 
C17 C 0.2178(7) 0.2589(6) 0.3858(4) 0.0254(18) Uani 1 1 d . . . 
H17 H 0.2996 0.3088 0.4167 0.031 Uiso 1 1 calc R . . 
C18 C 0.1928(7) 0.2418(6) 0.2972(5) 0.0290(19) Uani 1 1 d . . . 
H18 H 0.2591 0.2788 0.2679 0.035 Uiso 1 1 calc R . . 
C19 C 0.0757(7) 0.1732(6) 0.2498(5) 0.0308(19) Uani 1 1 d . . . 
H19 H 0.0604 0.1621 0.1888 0.037 Uiso 1 1 calc R . . 
C20 C -0.0190(7) 0.1210(6) 0.2935(4) 0.0268(18) Uani 1 1 d . . . 
H20 H -0.1013 0.0743 0.2622 0.032 Uiso 1 1 calc R . . 
C21 C 0.0042(6) 0.1357(6) 0.3826(4) 0.0244(18) Uani 1 1 d . . . 
H21 H -0.0625 0.0990 0.4115 0.029 Uiso 1 1 calc R . . 
C22 C 0.3396(7) -0.1128(7) 0.7609(5) 0.0269(18) Uani 1 1 d . . . 
C23 C 0.4392(7) -0.0418(7) 0.8261(5) 0.0295(19) Uani 1 1 d . . . 
H23 H 0.4843 0.0402 0.8219 0.035 Uiso 1 1 calc R . . 
C24 C 0.4740(8) -0.0891(8) 0.8972(5) 0.038(2) Uani 1 1 d . . . 
H24 H 0.5436 -0.0400 0.9409 0.046 Uiso 1 1 calc R . . 
C25 C 0.4073(8) -0.2070(8) 0.9044(5) 0.037(2) Uani 1 1 d . . . 
H25 H 0.4323 -0.2398 0.9524 0.045 Uiso 1 1 calc R . . 
C26 C 0.3035(8) -0.2788(7) 0.8418(5) 0.040(2) Uani 1 1 d . . . 
H26 H 0.2550 -0.3599 0.8474 0.049 Uiso 1 1 calc R . . 
C27 C 0.2732(7) -0.2285(7) 0.7715(5) 0.031(2) Uani 1 1 d . . . 
H27 H 0.2026 -0.2771 0.7283 0.038 Uiso 1 1 calc R . . 
C28 C 0.2858(6) -0.0595(6) 0.4463(4) 0.0223(17) Uani 1 1 d . . . 
C29 C 0.3605(7) -0.0990(6) 0.4159(4) 0.0275(19) Uani 1 1 d . . . 
H29 H 0.4110 -0.1214 0.4552 0.033 Uiso 1 1 calc R . . 
C30 C 0.3619(7) -0.1062(6) 0.3280(5) 0.0292(19) Uani 1 1 d . . . 
H30 H 0.4134 -0.1330 0.3081 0.035 Uiso 1 1 calc R . . 
C31 C 0.2879(7) -0.0742(7) 0.2700(5) 0.034(2) Uani 1 1 d . . . 
H31 H 0.2887 -0.0776 0.2104 0.041 Uiso 1 1 calc R . . 
C32 C 0.2128(7) -0.0369(6) 0.3016(5) 0.0299(19) Uani 1 1 d . . . 
H32 H 0.1624 -0.0140 0.2626 0.036 Uiso 1 1 calc R . . 
C33 C 0.2090(6) -0.0321(6) 0.3873(4) 0.0247(18) Uani 1 1 d . . . 
H33 H 0.1535 -0.0099 0.4063 0.030 Uiso 1 1 calc R . . 
C34 C 0.6847(7) 0.4002(7) 0.7917(4) 0.0282(19) Uani 1 1 d . . . 
C35 C 0.6709(7) 0.3177(7) 0.8494(4) 0.033(2) Uani 1 1 d . . . 
H35 H 0.6094 0.2382 0.8324 0.040 Uiso 1 1 calc R . . 
C36 C 0.7435(7) 0.3472(7) 0.9303(5) 0.032(2) Uani 1 1 d . . . 
H36 H 0.7319 0.2887 0.9686 0.038 Uiso 1 1 calc R . . 
C37 C 0.8338(8) 0.4623(7) 0.9563(5) 0.039(2) Uani 1 1 d . . . 
H37 H 0.8829 0.4836 1.0129 0.046 Uiso 1 1 calc R . . 
C38 C 0.8516(8) 0.5445(7) 0.9002(5) 0.051(3) Uani 1 1 d . . . 
H38 H 0.9135 0.6236 0.9178 0.061 Uiso 1 1 calc R . . 
C39 C 0.7806(8) 0.5143(7) 0.8175(5) 0.046(2) Uani 1 1 d . . . 
H39 H 0.7974 0.5719 0.7780 0.055 Uiso 1 1 calc R . . 
C40 C 0.5540(6) 0.3533(6) 0.4684(5) 0.0235(18) Uani 1 1 d . . . 
C41 C 0.5967(7) 0.4653(6) 0.4398(5) 0.032(2) Uani 1 1 d . . . 
H41 H 0.6258 0.5325 0.4801 0.038 Uiso 1 1 calc R . . 
C42 C 0.5970(7) 0.4791(7) 0.3539(5) 0.0312(19) Uani 1 1 d . . . 
H42 H 0.6260 0.5556 0.3355 0.037 Uiso 1 1 calc R . . 
C43 C 0.5559(7) 0.3837(7) 0.2947(5) 0.031(2) Uani 1 1 d . . . 
H43 H 0.5574 0.3937 0.2357 0.037 Uiso 1 1 calc R . . 
C44 C 0.5118(7) 0.2717(7) 0.3224(4) 0.0308(19) Uani 1 1 d . . . 
H44 H 0.4823 0.2049 0.2816 0.037 Uiso 1 1 calc R . . 
C45 C 0.5105(6) 0.2566(6) 0.4075(4) 0.0230(17) Uani 1 1 d . . . 
H45 H 0.4796 0.1796 0.4251 0.028 Uiso 1 1 calc R . . 
C46 C 0.3067(7) 0.1518(7) 0.9149(4) 0.0261(18) Uani 1 1 d . . . 
C47 C 0.3525(7) 0.2733(7) 0.9378(5) 0.032(2) Uani 1 1 d . . . 
C48 C 0.3456(7) 0.3221(7) 1.0141(5) 0.036(2) Uani 1 1 d . . . 
H48 H 0.3752 0.4045 1.0250 0.043 Uiso 1 1 calc R . . 
C49 C 0.2946(7) 0.2469(8) 1.0729(5) 0.040(2) Uani 1 1 d . . . 
H49 H 0.2905 0.2777 1.1262 0.048 Uiso 1 1 calc R . . 
C50 C 0.2492(8) 0.1270(9) 1.0557(5) 0.046(2) Uani 1 1 d . . . 
H50 H 0.2153 0.0761 1.0975 0.055 Uiso 1 1 calc R . . 
C51 C 0.2529(7) 0.0816(6) 0.9788(4) 0.0272(18) Uani 1 1 d . . . 
  
loop_ 
 _atom_site_aniso_label 
 _atom_site_aniso_U_11 
 _atom_site_aniso_U_22 
 _atom_site_aniso_U_33 
 _atom_site_aniso_U_23 
 _atom_site_aniso_U_13 
 _atom_site_aniso_U_12 
Ni1 0.0278(6) 0.0290(6) 0.0173(5) 0.0045(4) 0.0078(5) 0.0128(5) 
Br1 0.0363(5) 0.0325(5) 0.0263(5) 0.0008(4) 0.0097(4) 0.0132(4) 
Br2 0.0385(5) 0.0444(6) 0.0310(5) 0.0151(4) 0.0129(4) 0.0194(5) 
O1 0.026(3) 0.042(3) 0.021(3) 0.007(2) 0.007(2) 0.021(3) 
N1 0.025(4) 0.022(4) 0.013(3) 0.003(2) 0.007(3) 0.004(3) 
N2 0.029(4) 0.021(3) 0.015(3) 0.002(3) 0.006(3) 0.010(3) 
N3 0.026(4) 0.024(4) 0.024(4) 0.006(3) 0.009(3) 0.011(3) 
N4 0.020(3) 0.027(4) 0.010(3) 0.003(3) 0.009(3) 0.008(3) 
N5 0.016(3) 0.022(4) 0.018(3) 0.003(3) 0.002(3) 0.005(3) 
N6 0.025(4) 0.029(4) 0.015(3) 0.004(3) 0.006(3) 0.016(3) 
B1 0.037(6) 0.028(5) 0.025(5) 0.005(4) 0.007(4) 0.023(5) 
C1 0.024(5) 0.018(4) 0.035(5) 0.004(3) 0.011(4) 0.009(4) 
C2 0.031(5) 0.024(4) 0.023(4) 0.002(3) 0.007(4) 0.013(4) 
C3 0.028(5) 0.025(5) 0.026(5) 0.007(3) 0.008(4) 0.009(4) 
C4 0.022(4) 0.016(4) 0.025(4) 0.009(3) 0.008(3) 0.002(4) 
C5 0.024(5) 0.024(4) 0.023(4) -0.001(3) 0.001(4) 0.010(4) 
C6 0.015(4) 0.026(4) 0.028(4) 0.002(3) 0.005(3) 0.011(4) 
C7 0.031(5) 0.029(5) 0.018(4) 0.004(3) 0.002(4) 0.015(4) 
C8 0.025(5) 0.024(5) 0.028(5) 0.002(3) 0.003(4) 0.009(4) 
C9 0.034(5) 0.025(5) 0.030(5) 0.006(4) 0.009(4) 0.017(4) 
C10 0.017(4) 0.036(5) 0.018(4) -0.004(3) 0.006(3) 0.007(4) 
C11 0.025(5) 0.040(5) 0.015(4) -0.010(4) -0.005(4) 0.014(4) 
C12 0.029(5) 0.029(5) 0.030(5) 0.002(3) 0.007(4) 0.012(4) 
C13 0.030(5) 0.052(6) 0.032(5) -0.005(4) 0.007(4) 0.014(5) 
C14 0.030(5) 0.032(5) 0.049(6) -0.010(4) 0.012(4) 0.008(4) 
C15 0.051(6) 0.036(5) 0.034(5) 0.003(4) 0.021(4) 0.025(5) 
C16 0.020(4) 0.022(4) 0.026(4) 0.002(3) 0.006(4) 0.008(4) 
C17 0.030(5) 0.022(4) 0.027(5) 0.000(3) 0.001(4) 0.016(4) 
C18 0.035(5) 0.033(5) 0.022(5) 0.006(4) 0.009(4) 0.017(4) 
C19 0.031(5) 0.035(5) 0.026(5) 0.006(4) 0.003(4) 0.017(4) 
C20 0.027(5) 0.028(5) 0.023(4) -0.003(3) 0.000(4) 0.012(4) 
C21 0.018(4) 0.038(5) 0.018(4) -0.001(3) 0.001(3) 0.015(4) 
C22 0.028(5) 0.037(5) 0.026(5) 0.008(4) 0.012(4) 0.022(4) 
C23 0.039(5) 0.041(5) 0.027(5) 0.010(4) 0.015(4) 0.032(5) 
C24 0.036(5) 0.051(6) 0.035(5) 0.001(4) 0.002(4) 0.028(5) 
C25 0.045(6) 0.058(6) 0.025(5) 0.014(4) 0.010(4) 0.035(5) 
C26 0.069(7) 0.037(5) 0.032(5) 0.021(4) 0.020(5) 0.034(5) 
C27 0.037(5) 0.031(5) 0.026(5) 0.012(4) 0.015(4) 0.013(4) 
C28 0.024(4) 0.028(5) 0.020(4) 0.005(3) 0.010(3) 0.016(4) 
C29 0.031(5) 0.037(5) 0.020(4) 0.007(3) 0.009(4) 0.020(4) 
C30 0.031(5) 0.030(5) 0.029(5) -0.001(4) 0.008(4) 0.016(4) 
C31 0.036(5) 0.042(5) 0.025(5) 0.009(4) 0.014(4) 0.018(4) 
C32 0.029(5) 0.038(5) 0.024(5) 0.005(4) 0.005(4) 0.016(4) 
C33 0.023(4) 0.024(4) 0.026(4) 0.001(3) 0.011(4) 0.008(4) 
C34 0.025(5) 0.039(5) 0.019(4) 0.003(4) 0.003(4) 0.014(4) 
C35 0.040(5) 0.035(5) 0.016(4) -0.001(4) -0.001(4) 0.013(4) 
C36 0.030(5) 0.044(6) 0.022(5) 0.002(4) 0.002(4) 0.019(4) 
C37 0.043(6) 0.048(6) 0.024(5) -0.004(4) -0.009(4) 0.027(5) 
C38 0.052(6) 0.027(5) 0.036(5) -0.010(4) -0.023(5) -0.003(5) 
C39 0.052(6) 0.032(5) 0.040(6) 0.000(4) -0.011(5) 0.016(5) 
C40 0.013(4) 0.028(5) 0.028(5) 0.005(4) 0.006(3) 0.007(4) 
C41 0.037(5) 0.021(5) 0.037(5) 0.003(4) 0.012(4) 0.011(4) 
C42 0.031(5) 0.029(5) 0.031(5) 0.009(4) 0.012(4) 0.010(4) 
C43 0.033(5) 0.036(5) 0.014(4) 0.000(4) 0.001(4) 0.009(4) 
C44 0.036(5) 0.042(5) 0.016(4) 0.001(4) 0.001(4) 0.020(4) 
C45 0.021(4) 0.028(5) 0.024(4) 0.010(3) 0.008(3) 0.012(4) 
C46 0.023(4) 0.041(5) 0.014(4) 0.002(3) 0.000(3) 0.016(4) 
C47 0.033(5) 0.052(6) 0.018(4) 0.003(4) 0.007(4) 0.026(5) 
C48 0.044(6) 0.045(6) 0.023(5) -0.005(4) 0.000(4) 0.028(5) 
C49 0.039(6) 0.049(6) 0.024(5) -0.015(4) 0.001(4) 0.016(5) 
C50 0.049(6) 0.073(7) 0.026(5) 0.007(5) 0.001(4) 0.039(6) 
C51 0.033(5) 0.030(5) 0.017(4) 0.003(3) 0.005(4) 0.013(4) 
  
_geom_special_details 
; 
 All esds (except the esd in the dihedral angle between two l.s. planes) 
 are estimated using the full covariance matrix.  The cell esds are taken 
 into account individually in the estimation of esds in distances, angles 
 and torsion angles; correlations between esds in cell parameters are only 
 used when they are defined by crystal symmetry.  An approximate (isotropic) 
 treatment of cell esds is used for estimating esds involving l.s. planes. 
; 
  
loop_ 
 _geom_bond_atom_site_label_1 
 _geom_bond_atom_site_label_2 
 _geom_bond_distance 
 _geom_bond_site_symmetry_2 
 _geom_bond_publ_flag 
Ni1 O1 1.905(5) . ? 
Ni1 N1 2.024(6) . ? 
Ni1 N5 2.027(6) . ? 
Ni1 N3 2.043(6) . ? 
Ni1 Br1 2.6846(12) . ? 
Br1 C47 1.895(8) . ? 
Br2 C51 1.901(7) . ? 
O1 C46 1.282(8) . ? 
N1 C1 1.362(8) . ? 
N1 N2 1.379(7) . ? 
N2 C3 1.357(9) . ? 
N2 B1 1.544(10) . ? 
N3 C4 1.356(8) . ? 
N3 N4 1.377(7) . ? 
N4 C6 1.355(8) . ? 
N4 B1 1.526(10) . ? 
N5 C7 1.337(9) . ? 
N5 N6 1.363(7) . ? 
N6 C9 1.363(9) . ? 
N6 B1 1.538(10) . ? 
B1 H1 1.0000 . ? 
C1 C2 1.400(9) . ? 
C1 C10 1.463(9) . ? 
C2 C3 1.368(9) . ? 
C2 H2 0.9500 . ? 
C3 C16 1.458(9) . ? 
C4 C5 1.396(9) . ? 
C4 C22 1.462(9) . ? 
C5 C6 1.390(9) . ? 
C5 H5 0.9500 . ? 
C6 C28 1.468(9) . ? 
C7 C8 1.367(9) . ? 
C7 C34 1.483(10) . ? 
C8 C9 1.391(10) . ? 
C8 H8 0.9500 . ? 
C9 C40 1.473(9) . ? 
C10 C11 1.375(10) . ? 
C10 C15 1.394(10) . ? 
C11 C12 1.378(9) . ? 
C11 H11 0.9500 . ? 
C12 C13 1.388(10) . ? 
C12 H12 0.9500 . ? 
C13 C14 1.384(11) . ? 
C13 H13 0.9500 . ? 
C14 C15 1.383(10) . ? 
C14 H14 0.9500 . ? 
C15 H15 0.9500 . ? 
C16 C21 1.377(9) . ? 
C16 C17 1.393(9) . ? 
C17 C18 1.380(9) . ? 
C17 H17 0.9500 . ? 
C18 C19 1.371(10) . ? 
C18 H18 0.9500 . ? 
C19 C20 1.376(10) . ? 
C19 H19 0.9500 . ? 
C20 C21 1.386(9) . ? 
C20 H20 0.9500 . ? 
C21 H21 0.9500 . ? 
C22 C27 1.361(10) . ? 
C22 C23 1.386(10) . ? 
C23 C24 1.386(10) . ? 
C23 H23 0.9500 . ? 
C24 C25 1.372(11) . ? 
C24 H24 0.9500 . ? 
C25 C26 1.390(11) . ? 
C25 H25 0.9500 . ? 
C26 C27 1.380(10) . ? 
C26 H26 0.9500 . ? 
C27 H27 0.9500 . ? 
C28 C33 1.385(9) . ? 
C28 C29 1.395(9) . ? 
C29 C30 1.402(9) . ? 
C29 H29 0.9500 . ? 
C30 C31 1.387(10) . ? 
C30 H30 0.9500 . ? 
C31 C32 1.389(10) . ? 
C31 H31 0.9500 . ? 
C32 C33 1.372(9) . ? 
C32 H32 0.9500 . ? 
C33 H33 0.9500 . ? 
C34 C35 1.383(10) . ? 
C34 C39 1.395(10) . ? 
C35 C36 1.368(10) . ? 
C35 H35 0.9500 . ? 
C36 C37 1.383(10) . ? 
C36 H36 0.9500 . ? 
C37 C38 1.356(11) . ? 
C37 H37 0.9500 . ? 
C38 C39 1.384(10) . ? 
C38 H38 0.9500 . ? 
C39 H39 0.9500 . ? 
C40 C45 1.393(9) . ? 
C40 C41 1.401(9) . ? 
C41 C42 1.379(9) . ? 
C41 H41 0.9500 . ? 
C42 C43 1.368(9) . ? 
C42 H42 0.9500 . ? 
C43 C44 1.395(10) . ? 
C43 H43 0.9500 . ? 
C44 C45 1.370(9) . ? 
C44 H44 0.9500 . ? 
C45 H45 0.9500 . ? 
C46 C47 1.412(10) . ? 
C46 C51 1.414(10) . ? 
C47 C48 1.391(10) . ? 
C48 C49 1.371(11) . ? 
C48 H48 0.9500 . ? 
C49 C50 1.381(11) . ? 
C49 H49 0.9500 . ? 
C50 C51 1.365(10) . ? 
C50 H50 0.9500 . ? 
  
loop_ 
 _geom_angle_atom_site_label_1 
 _geom_angle_atom_site_label_2 
 _geom_angle_atom_site_label_3 
 _geom_angle 
 _geom_angle_site_symmetry_1 
 _geom_angle_site_symmetry_3 
 _geom_angle_publ_flag 
O1 Ni1 N1 118.5(2) . . ? 
O1 Ni1 N5 146.7(2) . . ? 
N1 Ni1 N5 94.3(2) . . ? 
O1 Ni1 N3 95.9(2) . . ? 
N1 Ni1 N3 93.4(2) . . ? 
N5 Ni1 N3 87.2(2) . . ? 
O1 Ni1 Br1 80.67(15) . . ? 
N1 Ni1 Br1 94.06(16) . . ? 
N5 Ni1 Br1 92.02(16) . . ? 
N3 Ni1 Br1 172.58(17) . . ? 
C47 Br1 Ni1 89.9(2) . . ? 
C46 O1 Ni1 129.1(5) . . ? 
C1 N1 N2 106.1(5) . . ? 
C1 N1 Ni1 139.2(5) . . ? 
N2 N1 Ni1 114.6(4) . . ? 
C3 N2 N1 110.6(6) . . ? 
C3 N2 B1 130.4(6) . . ? 
N1 N2 B1 118.7(6) . . ? 
C4 N3 N4 106.4(5) . . ? 
C4 N3 Ni1 140.8(5) . . ? 
N4 N3 Ni1 112.8(4) . . ? 
C6 N4 N3 109.8(5) . . ? 
C6 N4 B1 129.2(6) . . ? 
N3 N4 B1 120.6(6) . . ? 
C7 N5 N6 106.7(5) . . ? 
C7 N5 Ni1 138.6(5) . . ? 
N6 N5 Ni1 114.3(4) . . ? 
N5 N6 C9 109.5(6) . . ? 
N5 N6 B1 119.5(6) . . ? 
C9 N6 B1 130.9(6) . . ? 
N4 B1 N6 108.9(6) . . ? 
N4 B1 N2 110.2(6) . . ? 
N6 B1 N2 108.4(6) . . ? 
N4 B1 H1 109.8 . . ? 
N6 B1 H1 109.8 . . ? 
N2 B1 H1 109.8 . . ? 
N1 C1 C2 108.5(6) . . ? 
N1 C1 C10 124.9(6) . . ? 
C2 C1 C10 126.6(7) . . ? 
C3 C2 C1 107.8(7) . . ? 
C3 C2 H2 126.1 . . ? 
C1 C2 H2 126.1 . . ? 
N2 C3 C2 106.9(6) . . ? 
N2 C3 C16 123.1(6) . . ? 
C2 C3 C16 130.0(7) . . ? 
N3 C4 C5 110.0(6) . . ? 
N3 C4 C22 125.0(6) . . ? 
C5 C4 C22 124.9(7) . . ? 
C6 C5 C4 105.6(6) . . ? 
C6 C5 H5 127.2 . . ? 
C4 C5 H5 127.2 . . ? 
N4 C6 C5 108.1(6) . . ? 
N4 C6 C28 123.3(6) . . ? 
C5 C6 C28 128.3(6) . . ? 
N5 C7 C8 110.8(6) . . ? 
N5 C7 C34 121.9(6) . . ? 
C8 C7 C34 127.0(7) . . ? 
C7 C8 C9 106.0(7) . . ? 
C7 C8 H8 127.0 . . ? 
C9 C8 H8 127.0 . . ? 
N6 C9 C8 107.0(6) . . ? 
N6 C9 C40 125.2(7) . . ? 
C8 C9 C40 127.8(7) . . ? 
C11 C10 C15 119.1(7) . . ? 
C11 C10 C1 122.2(7) . . ? 
C15 C10 C1 118.6(7) . . ? 
C10 C11 C12 120.9(7) . . ? 
C10 C11 H11 119.5 . . ? 
C12 C11 H11 119.5 . . ? 
C11 C12 C13 119.9(7) . . ? 
C11 C12 H12 120.1 . . ? 
C13 C12 H12 120.1 . . ? 
C14 C13 C12 119.9(8) . . ? 
C14 C13 H13 120.1 . . ? 
C12 C13 H13 120.1 . . ? 
C15 C14 C13 119.7(8) . . ? 
C15 C14 H14 120.1 . . ? 
C13 C14 H14 120.1 . . ? 
C14 C15 C10 120.5(7) . . ? 
C14 C15 H15 119.7 . . ? 
C10 C15 H15 119.7 . . ? 
C21 C16 C17 118.2(7) . . ? 
C21 C16 C3 119.1(6) . . ? 
C17 C16 C3 122.6(7) . . ? 
C18 C17 C16 119.7(7) . . ? 
C18 C17 H17 120.2 . . ? 
C16 C17 H17 120.2 . . ? 
C19 C18 C17 122.3(7) . . ? 
C19 C18 H18 118.9 . . ? 
C17 C18 H18 118.9 . . ? 
C18 C19 C20 117.9(7) . . ? 
C18 C19 H19 121.1 . . ? 
C20 C19 H19 121.1 . . ? 
C19 C20 C21 120.8(7) . . ? 
C19 C20 H20 119.6 . . ? 
C21 C20 H20 119.6 . . ? 
C16 C21 C20 121.1(7) . . ? 
C16 C21 H21 119.4 . . ? 
C20 C21 H21 119.4 . . ? 
C27 C22 C23 117.8(7) . . ? 
C27 C22 C4 121.3(7) . . ? 
C23 C22 C4 120.4(7) . . ? 
C22 C23 C24 120.8(8) . . ? 
C22 C23 H23 119.6 . . ? 
C24 C23 H23 119.6 . . ? 
C25 C24 C23 119.7(8) . . ? 
C25 C24 H24 120.1 . . ? 
C23 C24 H24 120.1 . . ? 
C24 C25 C26 120.5(7) . . ? 
C24 C25 H25 119.8 . . ? 
C26 C25 H25 119.8 . . ? 
C27 C26 C25 117.9(8) . . ? 
C27 C26 H26 121.0 . . ? 
C25 C26 H26 121.0 . . ? 
C22 C27 C26 123.1(8) . . ? 
C22 C27 H27 118.4 . . ? 
C26 C27 H27 118.4 . . ? 
C33 C28 C29 118.6(6) . . ? 
C33 C28 C6 123.1(6) . . ? 
C29 C28 C6 118.4(6) . . ? 
C28 C29 C30 120.9(7) . . ? 
C28 C29 H29 119.6 . . ? 
C30 C29 H29 119.6 . . ? 
C31 C30 C29 119.9(7) . . ? 
C31 C30 H30 120.0 . . ? 
C29 C30 H30 120.0 . . ? 
C30 C31 C32 118.2(7) . . ? 
C30 C31 H31 120.9 . . ? 
C32 C31 H31 120.9 . . ? 
C33 C32 C31 122.2(7) . . ? 
C33 C32 H32 118.9 . . ? 
C31 C32 H32 118.9 . . ? 
C32 C33 C28 120.2(7) . . ? 
C32 C33 H33 119.9 . . ? 
C28 C33 H33 119.9 . . ? 
C35 C34 C39 117.2(7) . . ? 
C35 C34 C7 122.3(7) . . ? 
C39 C34 C7 120.1(7) . . ? 
C36 C35 C34 121.8(8) . . ? 
C36 C35 H35 119.1 . . ? 
C34 C35 H35 119.1 . . ? 
C35 C36 C37 120.1(8) . . ? 
C35 C36 H36 120.0 . . ? 
C37 C36 H36 120.0 . . ? 
C38 C37 C36 119.4(8) . . ? 
C38 C37 H37 120.3 . . ? 
C36 C37 H37 120.3 . . ? 
C37 C38 C39 120.7(8) . . ? 
C37 C38 H38 119.6 . . ? 
C39 C38 H38 119.6 . . ? 
C38 C39 C34 120.6(8) . . ? 
C38 C39 H39 119.7 . . ? 
C34 C39 H39 119.7 . . ? 
C45 C40 C41 118.2(7) . . ? 
C45 C40 C9 123.7(6) . . ? 
C41 C40 C9 118.1(7) . . ? 
C42 C41 C40 120.6(7) . . ? 
C42 C41 H41 119.7 . . ? 
C40 C41 H41 119.7 . . ? 
C43 C42 C41 120.7(7) . . ? 
C43 C42 H42 119.6 . . ? 
C41 C42 H42 119.6 . . ? 
C42 C43 C44 119.0(7) . . ? 
C42 C43 H43 120.5 . . ? 
C44 C43 H43 120.5 . . ? 
C45 C44 C43 120.8(7) . . ? 
C45 C44 H44 119.6 . . ? 
C43 C44 H44 119.6 . . ? 
C44 C45 C40 120.5(7) . . ? 
C44 C45 H45 119.7 . . ? 
C40 C45 H45 119.7 . . ? 
O1 C46 C47 123.5(7) . . ? 
O1 C46 C51 123.5(7) . . ? 
C47 C46 C51 113.0(6) . . ? 
C48 C47 C46 125.0(7) . . ? 
C48 C47 Br1 118.3(6) . . ? 
C46 C47 Br1 116.4(5) . . ? 
C49 C48 C47 117.5(8) . . ? 
C49 C48 H48 121.3 . . ? 
C47 C48 H48 121.3 . . ? 
C48 C49 C50 120.9(8) . . ? 
C48 C49 H49 119.5 . . ? 
C50 C49 H49 119.5 . . ? 
C51 C50 C49 120.1(8) . . ? 
C51 C50 H50 120.0 . . ? 
C49 C50 H50 120.0 . . ? 
C50 C51 C46 123.5(8) . . ? 
C50 C51 Br2 120.8(6) . . ? 
C46 C51 Br2 115.8(5) . . ? 
  
loop_ 
 _geom_torsion_atom_site_label_1 
 _geom_torsion_atom_site_label_2 
 _geom_torsion_atom_site_label_3 
 _geom_torsion_atom_site_label_4 
 _geom_torsion 
 _geom_torsion_site_symmetry_1 
 _geom_torsion_site_symmetry_2 
 _geom_torsion_site_symmetry_3 
 _geom_torsion_site_symmetry_4 
 _geom_torsion_publ_flag 
O1 Ni1 Br1 C47 -3.4(3) . . . . ? 
N1 Ni1 Br1 C47 114.8(3) . . . . ? 
N5 Ni1 Br1 C47 -150.7(3) . . . . ? 
N3 Ni1 Br1 C47 -66.7(13) . . . . ? 
N1 Ni1 O1 C46 -82.8(6) . . . . ? 
N5 Ni1 O1 C46 86.2(7) . . . . ? 
N3 Ni1 O1 C46 -179.8(6) . . . . ? 
Br1 Ni1 O1 C46 6.8(6) . . . . ? 
O1 Ni1 N1 C1 35.2(8) . . . . ? 
N5 Ni1 N1 C1 -138.7(7) . . . . ? 
N3 Ni1 N1 C1 133.8(7) . . . . ? 
Br1 Ni1 N1 C1 -46.4(7) . . . . ? 
O1 Ni1 N1 N2 -145.3(4) . . . . ? 
N5 Ni1 N1 N2 40.8(4) . . . . ? 
N3 Ni1 N1 N2 -46.7(4) . . . . ? 
Br1 Ni1 N1 N2 133.1(4) . . . . ? 
C1 N1 N2 C3 -2.3(7) . . . . ? 
Ni1 N1 N2 C3 178.0(4) . . . . ? 
C1 N1 N2 B1 -176.3(6) . . . . ? 
Ni1 N1 N2 B1 4.1(7) . . . . ? 
O1 Ni1 N3 C4 -19.4(8) . . . . ? 
N1 Ni1 N3 C4 -138.5(8) . . . . ? 
N5 Ni1 N3 C4 127.3(8) . . . . ? 
Br1 Ni1 N3 C4 43.0(18) . . . . ? 
O1 Ni1 N3 N4 159.7(4) . . . . ? 
N1 Ni1 N3 N4 40.7(4) . . . . ? 
N5 Ni1 N3 N4 -53.5(4) . . . . ? 
Br1 Ni1 N3 N4 -137.8(11) . . . . ? 
C4 N3 N4 C6 -0.2(7) . . . . ? 
Ni1 N3 N4 C6 -179.6(4) . . . . ? 
C4 N3 N4 B1 -173.4(6) . . . . ? 
Ni1 N3 N4 B1 7.2(7) . . . . ? 
O1 Ni1 N5 C7 -38.3(9) . . . . ? 
N1 Ni1 N5 C7 132.0(7) . . . . ? 
N3 Ni1 N5 C7 -134.8(7) . . . . ? 
Br1 Ni1 N5 C7 37.8(7) . . . . ? 
O1 Ni1 N5 N6 151.0(4) . . . . ? 
N1 Ni1 N5 N6 -38.7(4) . . . . ? 
N3 Ni1 N5 N6 54.5(4) . . . . ? 
Br1 Ni1 N5 N6 -132.9(4) . . . . ? 
C7 N5 N6 C9 -1.3(7) . . . . ? 
Ni1 N5 N6 C9 172.3(4) . . . . ? 
C7 N5 N6 B1 178.2(6) . . . . ? 
Ni1 N5 N6 B1 -8.2(7) . . . . ? 
C6 N4 B1 N6 -117.1(7) . . . . ? 
N3 N4 B1 N6 54.7(8) . . . . ? 
C6 N4 B1 N2 124.1(7) . . . . ? 
N3 N4 B1 N2 -64.1(8) . . . . ? 
N5 N6 B1 N4 -54.2(8) . . . . ? 
C9 N6 B1 N4 125.2(7) . . . . ? 
N5 N6 B1 N2 65.7(7) . . . . ? 
C9 N6 B1 N2 -114.9(8) . . . . ? 
C3 N2 B1 N4 -116.1(8) . . . . ? 
N1 N2 B1 N4 56.5(8) . . . . ? 
C3 N2 B1 N6 124.8(7) . . . . ? 
N1 N2 B1 N6 -62.6(7) . . . . ? 
N2 N1 C1 C2 1.2(7) . . . . ? 
Ni1 N1 C1 C2 -179.3(5) . . . . ? 
N2 N1 C1 C10 -179.6(6) . . . . ? 
Ni1 N1 C1 C10 -0.1(11) . . . . ? 
N1 C1 C2 C3 0.4(8) . . . . ? 
C10 C1 C2 C3 -178.9(7) . . . . ? 
N1 N2 C3 C2 2.6(8) . . . . ? 
B1 N2 C3 C2 175.6(7) . . . . ? 
N1 N2 C3 C16 -176.1(6) . . . . ? 
B1 N2 C3 C16 -3.0(11) . . . . ? 
C1 C2 C3 N2 -1.8(8) . . . . ? 
C1 C2 C3 C16 176.8(7) . . . . ? 
N4 N3 C4 C5 -1.0(8) . . . . ? 
Ni1 N3 C4 C5 178.2(6) . . . . ? 
N4 N3 C4 C22 174.4(6) . . . . ? 
Ni1 N3 C4 C22 -6.5(12) . . . . ? 
N3 C4 C5 C6 1.7(8) . . . . ? 
C22 C4 C5 C6 -173.6(7) . . . . ? 
N3 N4 C6 C5 1.3(8) . . . . ? 
B1 N4 C6 C5 173.7(7) . . . . ? 
N3 N4 C6 C28 -173.8(6) . . . . ? 
B1 N4 C6 C28 -1.3(11) . . . . ? 
C4 C5 C6 N4 -1.8(8) . . . . ? 
C4 C5 C6 C28 172.9(7) . . . . ? 
N6 N5 C7 C8 2.1(8) . . . . ? 
Ni1 N5 C7 C8 -169.1(5) . . . . ? 
N6 N5 C7 C34 -172.6(6) . . . . ? 
Ni1 N5 C7 C34 16.2(11) . . . . ? 
N5 C7 C8 C9 -2.0(8) . . . . ? 
C34 C7 C8 C9 172.4(7) . . . . ? 
N5 N6 C9 C8 0.1(8) . . . . ? 
B1 N6 C9 C8 -179.3(6) . . . . ? 
N5 N6 C9 C40 179.6(6) . . . . ? 
B1 N6 C9 C40 0.1(12) . . . . ? 
C7 C8 C9 N6 1.1(8) . . . . ? 
C7 C8 C9 C40 -178.3(7) . . . . ? 
N1 C1 C10 C11 -41.0(11) . . . . ? 
C2 C1 C10 C11 138.1(8) . . . . ? 
N1 C1 C10 C15 141.9(7) . . . . ? 
C2 C1 C10 C15 -39.0(11) . . . . ? 
C15 C10 C11 C12 0.3(11) . . . . ? 
C1 C10 C11 C12 -176.7(7) . . . . ? 
C10 C11 C12 C13 0.8(11) . . . . ? 
C11 C12 C13 C14 -1.1(12) . . . . ? 
C12 C13 C14 C15 0.4(12) . . . . ? 
C13 C14 C15 C10 0.7(12) . . . . ? 
C11 C10 C15 C14 -1.1(12) . . . . ? 
C1 C10 C15 C14 176.1(7) . . . . ? 
N2 C3 C16 C21 133.6(7) . . . . ? 
C2 C3 C16 C21 -44.7(11) . . . . ? 
N2 C3 C16 C17 -47.6(10) . . . . ? 
C2 C3 C16 C17 134.1(8) . . . . ? 
C21 C16 C17 C18 -3.1(10) . . . . ? 
C3 C16 C17 C18 178.2(7) . . . . ? 
C16 C17 C18 C19 1.8(11) . . . . ? 
C17 C18 C19 C20 0.4(11) . . . . ? 
C18 C19 C20 C21 -1.2(11) . . . . ? 
C17 C16 C21 C20 2.3(10) . . . . ? 
C3 C16 C21 C20 -179.0(6) . . . . ? 
C19 C20 C21 C16 -0.1(11) . . . . ? 
N3 C4 C22 C27 145.7(7) . . . . ? 
C5 C4 C22 C27 -39.6(11) . . . . ? 
N3 C4 C22 C23 -42.9(10) . . . . ? 
C5 C4 C22 C23 131.7(8) . . . . ? 
C27 C22 C23 C24 3.6(11) . . . . ? 
C4 C22 C23 C24 -168.0(7) . . . . ? 
C22 C23 C24 C25 -1.5(11) . . . . ? 
C23 C24 C25 C26 -1.6(12) . . . . ? 
C24 C25 C26 C27 2.4(12) . . . . ? 
C23 C22 C27 C26 -2.7(11) . . . . ? 
C4 C22 C27 C26 168.8(7) . . . . ? 
C25 C26 C27 C22 -0.3(12) . . . . ? 
N4 C6 C28 C33 -51.0(10) . . . . ? 
C5 C6 C28 C33 135.1(8) . . . . ? 
N4 C6 C28 C29 128.3(7) . . . . ? 
C5 C6 C28 C29 -45.7(11) . . . . ? 
C33 C28 C29 C30 2.7(11) . . . . ? 
C6 C28 C29 C30 -176.6(7) . . . . ? 
C28 C29 C30 C31 -0.3(11) . . . . ? 
C29 C30 C31 C32 -0.8(11) . . . . ? 
C30 C31 C32 C33 -0.6(11) . . . . ? 
C31 C32 C33 C28 3.1(11) . . . . ? 
C29 C28 C33 C32 -4.1(10) . . . . ? 
C6 C28 C33 C32 175.2(7) . . . . ? 
N5 C7 C34 C35 34.0(11) . . . . ? 
C8 C7 C34 C35 -139.9(8) . . . . ? 
N5 C7 C34 C39 -153.2(7) . . . . ? 
C8 C7 C34 C39 33.0(12) . . . . ? 
C39 C34 C35 C36 3.5(12) . . . . ? 
C7 C34 C35 C36 176.5(7) . . . . ? 
C34 C35 C36 C37 -0.1(12) . . . . ? 
C35 C36 C37 C38 -1.7(12) . . . . ? 
C36 C37 C38 C39 0.0(14) . . . . ? 
C37 C38 C39 C34 3.5(14) . . . . ? 
C35 C34 C39 C38 -5.2(12) . . . . ? 
C7 C34 C39 C38 -178.3(8) . . . . ? 
N6 C9 C40 C45 -45.9(11) . . . . ? 
C8 C9 C40 C45 133.5(8) . . . . ? 
N6 C9 C40 C41 133.1(7) . . . . ? 
C8 C9 C40 C41 -47.5(11) . . . . ? 
C45 C40 C41 C42 -0.9(11) . . . . ? 
C9 C40 C41 C42 -180.0(7) . . . . ? 
C40 C41 C42 C43 -0.2(12) . . . . ? 
C41 C42 C43 C44 1.0(12) . . . . ? 
C42 C43 C44 C45 -0.7(11) . . . . ? 
C43 C44 C45 C40 -0.4(11) . . . . ? 
C41 C40 C45 C44 1.2(10) . . . . ? 
C9 C40 C45 C44 -179.8(7) . . . . ? 
Ni1 O1 C46 C47 -8.1(10) . . . . ? 
Ni1 O1 C46 C51 169.6(5) . . . . ? 
O1 C46 C47 C48 177.2(7) . . . . ? 
C51 C46 C47 C48 -0.7(11) . . . . ? 
O1 C46 C47 Br1 2.9(10) . . . . ? 
C51 C46 C47 Br1 -175.1(5) . . . . ? 
Ni1 Br1 C47 C48 -173.4(6) . . . . ? 
Ni1 Br1 C47 C46 1.4(6) . . . . ? 
C46 C47 C48 C49 2.5(12) . . . . ? 
Br1 C47 C48 C49 176.8(6) . . . . ? 
C47 C48 C49 C50 -1.6(12) . . . . ? 
C48 C49 C50 C51 -1.0(13) . . . . ? 
C49 C50 C51 C46 3.0(12) . . . . ? 
C49 C50 C51 Br2 -178.7(6) . . . . ? 
O1 C46 C51 C50 -180.0(7) . . . . ? 
C47 C46 C51 C50 -2.0(11) . . . . ? 
O1 C46 C51 Br2 1.6(10) . . . . ? 
C47 C46 C51 Br2 179.5(5) . . . . ? 
  
_diffrn_measured_fraction_theta_max    1.000 
_diffrn_reflns_theta_full              25.03 
_diffrn_measured_fraction_theta_full   1.000 
_refine_diff_density_max    0.465 
_refine_diff_density_min   -0.495 
_refine_diff_density_rms    0.111 

#===END
